# Supplementary material
Source: Royal Society of Chemistry journal article supplement (doi:10.1039/d6gc01518b)

# Ultrasound-Generated Cyclodextrin–Amino Acid Inclusion Complex with NH<sub>3</sub><sup>+</sup>-Mediated Chalcone Activation: Metal-Free Catalysis Surpassing Nanoparticles

Divya Tagra, Mamta Guleria, Jyoti Agarwal\*

\*Department of Chemistry and Centre of Advanced Studies in Chemistry, Panjab University,  
Sector-14, Chandigarh, INDIA-160014

Email: [jyotiagarwa@gmail.com](mailto:jyotiagarwa@gmail.com), [jagarwal@pu.ac.in](mailto:jagarwal@pu.ac.in)

## Table of Contents

---

| S. No. | Contents                                                                                                             | Page No. |
|--------|----------------------------------------------------------------------------------------------------------------------|----------|
| 1.     | Experimental Section                                                                                                 |          |
|        | 1.1 Materials & Methods                                                                                              | 2        |
| 2.     | Characterisation Data of DA adducts                                                                                  | 3        |
| 3.     | <sup>1</sup> H-NMR of Inclusion Complexes and copies of <sup>1</sup> H and <sup>13</sup> C NMR Spectra of DA adducts | 10       |

---

## 1. EXPERIMENTAL SECTION

### 1.1 Materials & Methods

All reagents were used as purchased from commercial suppliers without further purification. Chalcones were synthesized as per the procedure reported in literature.<sup>1,2</sup> FT-IR spectra were recorded using Bruker alpha Eco-ATR spectrometer in the spectral region of 4000-650 cm<sup>-1</sup>. <sup>1</sup>H-NMR spectra were recorded on Bruker Avance Neo 500 MHz spectrometer in CDCl<sub>3</sub> and/or D<sub>2</sub>O solvents. Spectroscopic data are represented as follows: chemical shift (ppm), multiplicity (s = singlet, d = doublet, t = triplet, dd = doublet of doublets m = multiplet, br = broad singlet, ddd = doublet of doublet of doublet, dddd = doublet of doublet of doublet of doublet, td = triplet of doublet, dt = doublet of triplet, qd = quartet of doublet), integration, coupling constants in Hertz (Hz). <sup>13</sup>C NMR spectra were recorded at 125 MHz in CDCl<sub>3</sub> and/or D<sub>2</sub>O relative to trimethylsilane as internal standard. Reference peak for solvents were set as follows: in <sup>1</sup>H-NMR: CDCl<sub>3</sub> = 7.26 ppm, D<sub>2</sub>O = 4.79 ppm; in <sup>13</sup>C-NMR: CDCl<sub>3</sub> = 77.0 ppm. Chiral HPLC analysis was carried out on Shimadzu L202260 instrument by using chiral columns. Pure products were isolated and purified by column chromatography over 60-120 mesh size silica gel using hexane: EtOAc as eluent. The progress of the reaction was monitored by thin layer chromatography (TLC) on silica coated aluminum plates F<sub>254</sub> and visualized under UV chamber.

---

<sup>1</sup> J. Li, J. Zhang, M. Li, C. Zhang, Y. Yuanb and R. Liu, *Chem. Commun.*, 2019, **55**, 2348. DOI: 10.1039/c8cc09369e

<sup>2</sup> Y. Zhang, J. Su, W. Niu and Y. Li, *Chem. Asian J.*, 2019, **14**, 1477. DOI: 10.1002/asia.201900170

## 2. CHARACTERISATION DATA OF DA ADDUCTS

### Phenyl(3-phenylbicyclo[2.2.1]hept-5-en-2-yl)methanone (3a)

**Results:** 97% yield, pale-yellow oily liquid, dr = 72:28 (*endo:exo*); **IR (ATR):**  $\nu_{\max}$  3054, 3026, 2998, 2974, 1665, 1598, 1445, 1331, 1213, 1018, 746, 696, 664  $\text{cm}^{-1}$ ;  **$^1\text{H-NMR}$  (500 MHz,  $\text{CDCl}_3$ ):**  $\delta$  7.93-7.89 (m, 1.46H (*endo*)), 7.88-7.86 (m, 0.56H (*exo*)), 7.53-7.47 (m, 1H), 7.44-7.27 (m, 4H), 7.25-7.12 (m, 3H), 6.47-6.43 (m, 1H), 6.14 (dd,  $J = 3.0$  Hz, 8.5 Hz, 0.28H (*exo*)), 5.85 (dd,  $J = 2.5$  Hz, 5.5 Hz, 0.72H (*endo*)), 3.88 (dd,  $J = 3.5$  Hz, 5.0 Hz, 1H), 3.45 (dd,  $J = 1.5$  Hz, 4.5 Hz, 0.72H (*endo*)), 3.41 (dd,  $J = 1.5$  Hz, 5.5 Hz, 0.28H (*exo*)), 3.32 (s, 0.72H (*endo*)), 3.15 (s, 0.28H (*exo*)), 3.12-3.08 (m, 1H), 2.01 (dd,  $J = 1.5$  Hz, 6 Hz, 0.72H (*endo*)), 1.87 (dd,  $J = 1.0$  Hz, 6 Hz, 0.28H (*exo*)), 1.62 (dq,  $J = 2.0$ , 8.5 Hz, 0.72H (*endo*)), 1.51 (dq,  $J = 1.5$  Hz, 8.5 Hz, 0.28H (*exo*)) ppm;  **$^{13}\text{C NMR}$  (125 MHz,  $\text{CDCl}_3$ ):**  $\delta$  201.7, 200.1, 144.8, 143.6, 139.3, 137.4, 137.1, 137.0, 136.6, 133.1, 133.0, 132.9, 128.7, 128.6, 128.5, 128.3, 128.2, 127.6, 126.3, 126.1, 56.3, 54.6, 49.0, 48.9, 48.7, 48.6, 48.1, 48.0, 47.8, 46.0 ppm.

### 4-Fluorophenyl-(3-phenylbicyclo[2.2.1]hept-5-en-2-yl)methanone (3b)

**Results:** 95% yield, colorless oily liquid, dr = 74:26 (*endo:exo*); **IR (ATR):**  $\nu_{\max}$  3057, 3029, 2988, 1678, 1499, 1451, 1331, 1216, 1014, 833, 742, 669  $\text{cm}^{-1}$ ;  **$^1\text{H-NMR}$  (500 MHz,  $\text{CDCl}_3$ ):**  $\delta$  7.90-7.86 (m, 1.57H (*endo*)), 7.83-7.78 (m, 0.53H (*exo*)), 7.24-7.09 (m, 5H), 7.04-6.93 (m, 2H), 6.41-6.37 (m, 1H), 6.09 (dd,  $J = 3.0$  Hz, 5.0 Hz, 0.26H (*exo*)), 5.80 (dd,  $J = 3.0$  Hz, 5.5 Hz, 0.74H (*endo*)), 3.78 (dd,  $J = 2.5$  Hz, 5.5 Hz, 0.74H (*endo*)), 3.75 (dd,  $J = 3.5$  Hz, 5.0 Hz, 0.26H (*exo*)), 3.36 (dd,  $J = 5.0$  Hz, 8.5 Hz, 0.74H (*endo*)), 3.29 (dd,  $J = 4.0$  Hz, 8.5 Hz, 0.26H (*exo*)), 3.24 (s, 0.74H (*endo*)), 3.09 (s, 0.26H (*exo*)), 3.06-3.02 (m, 1H), 1.95 (d,  $J = 8.5$  Hz, 0.74H (*endo*)), 1.85 (d,  $J = 9.0$  Hz, 0.26H (*exo*)), 1.58 (dd,  $J = 1.5$  Hz, 8.5 Hz, 0.76H (*endo*)), 1.47 (dd,  $J = 1.0$  Hz, 8.5 Hz, 0.24H (*exo*)) ppm;  **$^{13}\text{C NMR}$  (125 MHz,  $\text{CDCl}_3$ ):**  $\delta$  199.8, 198.6, 165.8 (d,  $J = 253.7$  Hz), 165.7 (d,  $J = 252.5$  Hz), 144.6, 143.4, 139.4, 137.0, 136.6, 133.7 (d,  $J = 3.7$  Hz), 133.5 (d,  $J = 3.7$  Hz), 133.0, 131.2 (d,  $J = 6.2$  Hz), 131.1 (d,  $J = 6.2$  Hz), 128.7, 128.3, 128.1, 127.6, 126.5, 126.2, 115.8 (d,  $J = 12.5$  Hz), 115.6 (d,  $J = 15.0$  Hz), 56.2, 54.6, 49.1, 48.8, 48.7, 48.7, 48.2, 48.1, 46.2 ppm.  $\delta$  -105.69 (*exo*), -105.80 (*endo*) ppm

### 4-Chlorophenyl-(3-phenylbicyclo[2.2.1]hept-5-en-2-yl)methanone (3c)

**Results:** 92% yield, colorless oily liquid, dr = 71:29 (*endo:exo*); **IR (ATR):**  $\nu_{\max}$  3054, 3027, 2994, 2973, 1665, 1594, 1443, 1215, 1015, 743, 691, 664  $\text{cm}^{-1}$ ;  **$^1\text{H-NMR}$  (500 MHz,  $\text{CDCl}_3$ ):**  $\delta$  7.85 (dt,  $J = 2.5$  Hz, 9.0 Hz, 1.48H (*endo*)), 7.78 (dt,  $J = 2.5$  Hz, 9.0 Hz, 0.60H (*exo*)), 7.39

(dt,  $J = 2.5$  Hz, 9.0 Hz, 1.43H (*endo*)), 7.33 (dt,  $J = 2.5$  Hz, 9.0 Hz 0.63H (*exo*)), 7.31-7.12 (m, 5H), 6.48-6.44 (m, 1H), 6.16 (dd,  $J = 3.0$  Hz, 5.5 Hz, 0.29H (*exo*)), 5.87 (dd,  $J = 3.0$  Hz, 5.5 Hz, 0.71H (*endo*)), 3.84 (dd,  $J = 3.5$  Hz, 5.0 Hz, 0.71H (*endo*)), 3.81 (dd,  $J = 4.0$  Hz, 5.0 Hz, 0.29H (*exo*)), 3.43 (dd,  $J = 1.5$  Hz, 5.0 Hz, 0.71H (*endo*)), 3.35 (dd,  $J = 1.5$  Hz, 5.0 Hz 0.29H (*exo*)), 3.31 (s, 0.71H (*endo*)), 3.16 (s, 0.29H (*exo*)), 3.13-3.10 (m, 1H), 2.02 (d,  $J = 8.5$  Hz, 0.71H (*endo*)), 1.87 (d,  $J = 9.0$  Hz, 0.29H (*exo*)), 1.65 (dd,  $J = 1.5$  Hz, 7.0 Hz 0.71H (*endo*)), 1.54 (d,  $J = 1.5$  Hz, 0.29H (*exo*)) ppm;  $^{13}\text{C}$  NMR (125 MHz,  $\text{CDCl}_3$ ):  $\delta$  200.2, 199.0, 144.6, 143.4, 139.5, 139.4, 139.4, 137.0, 136.6, 136.1, 135.6, 135.3, 133.0, 129.9, 129.0, 128.9, 128.7, 128.3, 128.1, 128.0, 127.6, 126.5, 126.2, 56.3, 54.7, 49.1, 48.7, 48.6, 48.2, 48.1, 46.2 ppm.

#### 4-Bromophenyl(3-phenylbicyclo[2.2.1]hept-5-en-2-yl)methanone (3d)

**Results:** 89% yield, colorless oily liquid, dr = 69:31 (*endo:exo*); **IR (ATR):**  $\nu_{\text{max}}$  3058, 3021, 2964, 1742, 1678, 1459, 1362, 1223, 1015, 793, 715, 694  $\text{cm}^{-1}$ ;  **$^1\text{H}$ -NMR (500 MHz,  $\text{CDCl}_3$ ):**  $\delta$  7.78 (dd,  $J = 2.0$  Hz, 5.0 Hz, 1.44H (*endo*)), 7.71 (dd,  $J = 2.0$  Hz, 5.0 Hz, 0.64H (*exo*)), 7.56 (dd,  $J = 2.0$  Hz, 6.5 Hz, 1.36H (*endo*)) 7.51 (dd,  $J = 1.5$  Hz, 6.5 Hz, 0.68H (*exo*)), 7.32-7.27 (m, 3H), 7.25-7.12 (m, 2H), 6.48-6.44 (m, 1H), 6.16 (dd,  $J = 2.5$  Hz, 5.5 Hz, 0.31H (*exo*)), 5.87 (dd,  $J = 2.5$  Hz, 5.5 Hz, 0.69H (*endo*)), 3.84 (dd,  $J = 3.0$  Hz, 5.0 Hz, 0.69H (*endo*)), 3.81 (dd,  $J = 3.0$  Hz, 5.0 Hz, 0.31H (*exo*)), 3.43 (dd,  $J = 1.0$  Hz, 4.5 Hz, 0.69H (*endo*)), 3.35 (dd,  $J = 1.0$  Hz, 4.5 Hz, 0.31H (*exo*)), 3.31 (s, 0.69H (*endo*)), 3.16 (s, 0.31H (*exo*)), 3.14-3.10 (m, 1H), 2.02 (d,  $J = 8.5$  Hz, 0.69H (*endo*)), 1.87 (d,  $J = 8.5$  Hz, 0.31H (*exo*)), 1.65 (dd,  $J = 1.5$  Hz, 8.5 Hz, 0.69H (*endo*)), 1.55 (d,  $J = 1.5$  Hz, 0.31H (*exo*)) ppm;  $^{13}\text{C}$  NMR (125 MHz,  $\text{CDCl}_3$ ):  $\delta$  200.4 199.2, 144.5, 143.3, 139.4, 137.0, 136.6, 136.0, 135.8, 133.0, 132.0, 130.2, 130.1, 128.7, 128.4, 128.2, 128.1, 128.1, 127.6, 126.5, 126.2, 56.3, 54.7, 49.1, 48.7, 48.7, 48.6, 48.2, 48.2, 46.2 ppm.

#### 4-Methoxyphenyl(3-phenylbicyclo[2.2.1]hept-5-en-2-yl)methanone (3e)

**Results:** 91% yield, yellow oily liquid, dr = 40:60 (*endo:exo*); **IR (ATR):**  $\nu_{\text{max}}$  3021, 2956, 2922, 1741, 1667, 1607, 1443, 1362, 1225, 1012, 813, 742, 692  $\text{cm}^{-1}$ ;  **$^1\text{H}$ -NMR (500 MHz,  $\text{CDCl}_3$ ):**  $\delta$  7.91 (dt,  $J = 5.0$  Hz, 9.5 Hz, 0.86H (*endo*)) 7.86 (dd,  $J = 5.0$  Hz, 9.5 Hz, 1.21H (*exo*)), 7.31-7.25 (m, 2H), 7.23-7.13 (m, 3H), 6.90 (dd,  $J = 2.0$  Hz, 7.0 Hz, 0.84H (*endo*)), 6.85 (dd,  $J = 2.0$  Hz, 7.0 Hz, 1.23H (*exo*)), 6.47-6.44 (m, 1H), 6.16 (dd,  $J = 2.5$  Hz, 5.5 Hz, 0.60H (*exo*)), 5.88 (dd,  $J = 2.5$  Hz, 5.5 Hz, 0.40H (*endo*)), 3.90-3.85 (m, 2.2H {1.2H, -OCH<sub>3</sub> (*endo*) + 1H (*endo* + *exo*)}), 3.83 (s, 1.8H, -OCH<sub>3</sub> (*exo*)), 3.46 (dd,  $J = 1.5$  Hz, 5.0 Hz, 0.40H (*endo*)), 3.38 (dd,  $J = 1.5$  Hz, 5.0 Hz, 0.60H (*exo*)), 3.32 (s, 0.40H (*endo*)), 3.16 (s, 0.60H (*exo*)), 3.11

(s, 1H), 2.01 (d,  $J = 8.5$  Hz, 0.40H(*endo*)), 1.91(d,  $J = 8.5$  Hz, 0.60H(*exo*)), 1.63 (dd,  $J = 1.5$  Hz, 8.5 Hz, 0.40H(*endo*)), 1.53 (dd,  $J = 1.5$  Hz, 8.5 Hz, 0.60H(*exo*)) ppm;  $^{13}\text{C}$  NMR (125 MHz,  $\text{CDCl}_3$ ):  $\delta$  199.8, 198.5, 163.5, 145.0, 143.8, 139.2, 136.9, 136.7, 133.2, 130.9, 130.8, 130.3, 130.1, 128.6, 128.2, 128.2, 127.7, 126.3, 126.1, 113.8 113.8, 55.9, 55.9, 55.6 55.6, 54.2, 49.1, 48.9, 48.6, 48.2, 48.1, 48.0, 46.0 ppm.

**(3-(4-Fluorophenyl)bicyclo[2.2.1]hept-5-en-2-yl)(phenyl)methanone (3f)**

**Results:** 93% yield, colorless oily liquid, dr = 68:32 (*endo:exo*); IR (ATR):  $\nu_{\text{max}}$  3057, 3024, 2984, 1672, 1491, 1452, 1331, 1213, 1014, 832, 743, 701  $\text{cm}^{-1}$ ;  $^1\text{H}$ -NMR (500 MHz,  $\text{CDCl}_3$ ):  $\delta$  7.92 (dd,  $J = 1.5$  Hz, 7.0 Hz, 1.39H (*endo*)), 7.87 (dd,  $J = 1.5$  Hz, 7.0 Hz, 0.64H (*exo*)), 7.57-7.50 (m, 1H), 7.47-7.37 (m, 2H), 7.24-7.20 (m, 1.39H), 7.13-7.09 (m, 0.68H), 7.00-6.89 (m, 2H), 6.48 (dd,  $J = 3.0$  Hz, 5.0 Hz, 0.32H (*exo*)), 6.45 (dd,  $J = 3.0$  Hz, 5.0 Hz, 0.68H (*endo*)), 6.14 (dd,  $J = 3.0$  Hz, 5.5 Hz, 0.32H(*exo*)), 5.86(dd,  $J = 3.0$  Hz, 5.0 Hz, 0.68H (*endo*)), 3.87 (dd,  $J = 3.5$  Hz, 5.0 Hz, 0.32H (*exo*)), 3.83 (dd,  $J = 3.5$  Hz, 5.0 Hz, 0.68H (*endo*)), 3.44 (d,  $J = 4.5$  Hz, 0.68H (*endo*)), 3.36 (dd,  $J = 1.5$  Hz, 5.5 Hz, 0.32H (*exo*)), 3.35 (s, 0.68H (*endo*)), 3.15-3.13 (m, 0.64H), 3.07 (s, 0.68H (*endo*)), 1.98 (d,  $J = 8.5$  Hz, 0.55H (*endo*)), 1.87 (d,  $J = 9.0$  Hz, 0.45H (*exo*)), 1.65 (dd,  $J = 1.5$  Hz, 6.5 Hz, 0.68H (*endo*)), 1.53 (dd,  $J = 1.5$  Hz, 8.5 Hz, 0.32H (*exo*)) ppm;  $^{13}\text{C}$  NMR (125 MHz,  $\text{CDCl}_3$ ):  $\delta$  200.8, 200.0, 161.5 (d,  $J = 248.7$  Hz), 161.4 (d,  $J = 248.7$  Hz), 140.4 (d,  $J = 3.7$  Hz), 139.3, 137.3, 137.0, 136.8, 136.7, 133.1, 133.0 (d,  $J = 3.7$  Hz), 129.4 (d,  $J = 7.5$  Hz), 128.9 (d,  $J = 7.5$  Hz), 128.7, 128.7, 128.6, 128.5, 115.4 (d,  $J = 20.0$  Hz), 114.9 (d,  $J = 20.0$  Hz), 56.6, 54.9, 49.0, 48.7, 48.7 48.1, 48.0, 47.1, 45.2 ppm.  $^{19}\text{F}$  NMR (470 MHz,  $\text{CDCl}_3$ ):  $\delta$  -117.76 (*exo*), -117.48 (*endo*) ppm

**(3-(4-Chlorophenyl)bicyclo[2.2.1]hept-5-en-2-yl)(phenyl)methanone (3g)**

**Results:** 92% yield, yellow oily liquid, dr = 63:37 (*endo:exo*); IR (ATR):  $\nu_{\text{max}}$  2953, 2927, 1731, 1672, 1453, 1254, 1014, 795, 734, 692  $\text{cm}^{-1}$ ;  $^1\text{H}$ -NMR (500 MHz,  $\text{CDCl}_3$ ):  $\delta$  7.92 (dd,  $J = 1.5$  Hz, 8.5 Hz, 1.29H (*endo*)), 7.88 (dd,  $J = 1.5$  Hz, 8.5 Hz, 0.71H (*exo*)), 7.57- 7.50 (m, 1H), 7.46- 7.38 (m, 2H), 7.27-7.23 (m, 1.41H), 7.21-7.17 (m, 2H), 7.07(dd,  $J = 1.5$  Hz, 7.0 Hz, 0.75H), 6.48 (dd,  $J = 2.0$  Hz, 7.0 Hz, 0.37H(*exo*)), 6.45 (dd,  $J = 2.0$  Hz, 7.0 Hz, 0.63H(*endo*)), 6.14-6.12 (m, 0.37H (*exo*)), 5.86 (dd,  $J = 2.5$  Hz, 5.5 Hz, 0.63H (*endo*)), 3.88 (dd,  $J = 3.5$  Hz, 8.5 Hz, 0.37H), 3.83 (dd,  $J = 3.5$  Hz, 8.5 Hz, 0.63H (*endo*)), 3.44 (dd,  $J = 1.5$  Hz, 5.0 Hz, 0.63H (*endo*)), 3.37 (dd,  $J = 1.5$  Hz, 5.0 Hz, 0.37H (*exo*)), 3.34 (s, 0.67H), 3.15-3.12 (m, 0.74H), 3.10-3.05 (m, 0.63H), 1.96 (d,  $J = 8.5$  Hz, 0.63H (*endo*)), 1.87 (d,  $J = 9.0$  Hz, 0.37H (*exo*)), 1.65 (dd,  $J = 3.5$  Hz, 8.5 Hz 0.63H (*endo*)), 1.54 (dd,  $J = 1.5$  Hz, 8.5 Hz, 0.37H (*exo*)) ppm;  $^{13}\text{C}$

**NMR (125 MHz, CDCl<sub>3</sub>):**  $\delta$  200.9, 199.8, 143.3, 142.1, 139.2, 137.2, 136.9, 136.7, 133.1, 133.1, 133.0, 132.1, 131.8, 129.4, 128.9, 128.8, 128.7, 128.6, 128.5, 128.3, 56.5, 54.7, 49.0, 48.9, 48.8, 48.5, 48.1, 48.0, 47.2, 45.3 ppm.

**(3-(4-Bromophenyl)bicyclo[2.2.1]hept-5-en-2-yl)(phenyl)methanone (3h)**

**Results:** 89% yield, yellow oily liquid, dr = 55:45 (*endo:exo*); **IR (ATR):**  $\nu_{\max}$  3062, 2964, 2923, 1672, 1592, 1442, 1333, 1257, 1213, 1015, 814, 752, 723, 691 cm<sup>-1</sup>; **<sup>1</sup>H-NMR (500 MHz, CDCl<sub>3</sub>):**  $\delta$  7.92 (dd, *J* = 2.0 Hz, 7.0 Hz, 1.17H (*endo*)), 7.89 (dd, *J* = 2.0 Hz, 7.0 Hz, 0.88H (*exo*)), 7.57-7.51 (m, 1H), 7.47-7.33 (m, 4H), 7.14 (dd, *J* = 2.5 Hz, 10.5 Hz 1.13H), 7.03 (dd, *J* = 1.0 Hz, 7.0 Hz, 0.91H), 6.48 (dd, *J* = 3.5 Hz, 5.5 Hz, 0.45H (*exo*)), 6.45 (dd, *J* = 3.5 Hz, 6.0 Hz, 0.55H (*endo*)), 6.13 (dd, *J* = 3.0 Hz, 5.5 Hz, 0.45H (*exo*)), 5.86 (dd, *J* = 3.0 Hz, 5.5 Hz, 0.55H (*endo*)), 3.87 (dd, *J* = 3.5 Hz, 5.0 Hz, 0.45H (*exo*)), 3.83 (dd, *J* = 3.5 Hz, 5.0 Hz, 0.55H (*endo*)), 3.43 (d, *J* = 4.0 Hz, 0.55H (*endo*)), 3.37 (dd, *J* = 1.5 Hz, 5.5 Hz, 0.45H (*exo*)), 3.35 (s, 0.55H), 3.15-3.12 (m, 0.85H), 3.08 (d, *J* = 1.5 Hz, 0.55H (*endo*)), 1.96 (d, *J* = 8.5 Hz, 0.55H (*endo*)), 1.87 (d, *J* = 8.5 Hz, 0.45H (*exo*)), 1.66 (dq, *J* = 1.5 Hz, 8.5 Hz, 0.65H (*endo*)), 1.53 (d, *J* = 1.5 Hz, 0.45H (*exo*)) ppm; **<sup>13</sup>C NMR (125 MHz, CDCl<sub>3</sub>):**  $\delta$  200.9, 199.8, 139.2, 137.2, 136.9, 136.7, 133.2, 133.1, 133.1, 131.7, 131.3, 130.3, 129.8, 128.7, 128.6, 128.5, 56.5, 54.7, 49.1, 48.9, 48.8, 48.5, 48.1, 48.0, 47.2, 45.4 ppm.

**Phenyl-(3-(*p*-tolyl)bicyclo[2.2.1]hept-5-en-2-yl)methanone (3i)**

**Results:** 91% yield, yellow oily liquid dr = 68:32 (*endo:exo*); **IR (ATR):**  $\nu_{\max}$  3051, 2973, 1672, 1592, 1444, 1325, 1204, 1013, 805, 766, 789, 662 cm<sup>-1</sup>; **<sup>1</sup>H-NMR (500 MHz, CDCl<sub>3</sub>):**  $\delta$  7.95- 7.92 (m, 1.40H (*endo*)), 7.91-7.88 (m, 0.64H (*exo*)), 7.56-7.49 (m, 1H), 7.46-7.37 (m, 2H), 7.18-7.09(m, 3H), 7.05 (s, 1H), 6.50 - 6.45 (m, 1H), 6.18 (dd, *J* = 3.0 Hz, 6.0 Hz, 0.32H (*exo*)), 5.87 (dd, *J* = 3.0 Hz, 6.0 Hz, 0.68H (*endo*)), 3.90 (dd, *J* = 3.5 Hz, 5.0 Hz, 0.68H (*endo*)), 3.87 (dd, *J* = 3.0 Hz, 5.0 Hz, 0.32H(*exo*)) 3.44 (d, *J* = 4.0 Hz, 0.68H (*endo*)), 3.42 (dd, *J* = 1.0 Hz, 5.0 Hz, 0.32H (*exo*)), 3.33 (s, 0.68H (*endo*)), 3.16 (s, 0.32H (*exo*)), 3.13 (s, 0.32H (*exo*)), 3.09 (d, *J* = 1.5 Hz, 0.68H (*endo*)), 2.32 (s, 2H, CH<sub>3</sub> (*endo*)), 2.30 (s, 1H, CH<sub>3</sub> (*exo*)), 2.03 (d, *J* = 10.0 Hz, 0.68H (*endo*)), 1.90 (d, *J* = 10.0 Hz, 0.32H (*exo*)), 1.64 (dq, *J* = 1.5 Hz, 8.5 Hz, 0.68H (*endo*)), 1.54 (dq, *J* = 1.5 Hz, 8.5 Hz, 0.32H (*exo*)) ppm; **<sup>13</sup>C NMR (125 MHz, CDCl<sub>3</sub>):**  $\delta$  201.4, 200.2, 141.7, 140.6, 139.3, 137.4, 137.1, 137.0, 136.6, 135.8, 135.6, 133.0, 133.0, 132.9, 129.3, 128.9, 128.6, 128.6, 128.5, 128.0, 127.5, 56.3, 54.7, 49.0, 48.9, 48.8, 48.7, 48.1, 47.9, 47.5, 45.6, 46.0, 30.5, 29.8, 21.1, 21.1 ppm.

**(3-(4-Nitrophenyl)bicyclo[2.2.1]hept-5-en-2-yl)(phenyl)methanone (3j)**

**Results:** 95% yield, yellow oily liquid, dr = 67:33 (*endo:exo*); **IR (ATR):**  $\nu_{\max}$  3052, 2983, 2854, 1678, 1593, 1509, 1448, 1422, 1346, 1271, 1226, 1015, 822, 747, 672  $\text{cm}^{-1}$ ;  **$^1\text{H-NMR}$  (500 MHz,  $\text{CDCl}_3$ ):**  $\delta$  8.13 (dt,  $J = 2.5$  Hz, 4.0 Hz, 1.32H), 8.09 (dt,  $J = 0.5$  Hz, 8.0 Hz, 0.64H), 7.96- 7.90 (m, 2H), 7.59-7.53 (m, 1H), 7.48- 7.40 (m, 3.38H), 7.30 (dt,  $J = 2.0$  Hz, 3.5 Hz, 0.68H), 6.54 (dd,  $J = 3.0$  Hz, 5.5 Hz, 0.33H), 6.47 (dd,  $J = 3.0$  Hz, 5.5 Hz, 0.67H) 6.13 (dd,  $J = 3.0$  Hz, 6.0 Hz, 0.33H), 5.87(dd,  $J = 3.0$  Hz, 6.0 Hz, 0.67H), 4.10 (dd,  $J = 3.5$  Hz, 5.0 Hz, 0.33H), 3.85 (dd,  $J = 1.0$  Hz, 5.0 Hz, 0.67H), 3.62 (d,  $J = 4$  Hz, 0.67H), 3.45(dd,  $J = 1.5$  Hz, 9.0 Hz, 0.33H), 3.41(s, 0.68H), 3.22(s, 0.33H), 3.19- 3.16(m, 1H), 1.97 (d,  $J = 8.5$  Hz, 0.68H), 1.89 (d,  $J = 8.5$  Hz, 0.33H), 1.71(dq,  $J = 1.5$  Hz, 9.0 Hz, 0.67H), 1.57 (dq,  $J = 1.5$  Hz, 9.0 Hz, 0.33H) ppm;  **$^{13}\text{C NMR}$  (125 MHz,  $\text{CDCl}_3$ ):**  $\delta$  200.0, 199.2, 152.9, 151.7, 146.6, 146.4, 139.1, 137.3, 136.9, 136.6, 136.4, 133.4, 133.2, 133.2, 128.8, 128.8, 128.6, 128.4, 128.3, 123.9, 123.5, 56.7, 54.7, 49.3, 49.0, 48.9,, 48.2, 48.1, 47.9, 47.5, 45.8 ppm.

#### **4-(3-Benzoylbicyclo[2.2.1]hept-5-en-2-yl)benzotrile (3k)**

**Results:** 94% yield, yellow oily liquid, dr = 45:55 (*endo:exo*); **IR (ATR):**  $\nu_{\max}$  2971, 2980, 2227, 1675, 1607, 1597, 1505, 1448, 1330, 1211, 1017, 833, 761, 695, 563  $\text{cm}^{-1}$ ;  **$^1\text{H-NMR}$  (500 MHz,  $\text{CDCl}_3$ ):**  $\delta$  7.95- 7.89 (m, 2H), 7.59-7.51 (m, 3H), 7.50-7.42 (m, 2H) 7.40- 7.35 (m, 1H), 7.26-7.24 (m, 1H), 6.52 (dd,  $J = 3.0$  Hz, 5.5 Hz, 0.54H (*exo*)), 6.46 (dd,  $J = 3.0$  Hz, 5.5 Hz, 0.46H (*endo*)), 6.12 (dd,  $J = 3.0$  Hz, 5.5 Hz, 0.54H(*exo*)), 5.86 (dd,  $J = 3.0$  Hz, 5.5 Hz, 0.46H (*endo*)), 4.04 (dd,  $J = 3.5$  Hz, 5.0 Hz, 0.54H), 3.83 (dd,  $J = 3.5$  Hz, 5.0 Hz, 0.46H) 3.56 (d,  $J = 4.0$  Hz, 0.46H), 3.42 (dd,  $J = 1.5$  Hz, 5.5 Hz, 0.54H(*exo*)), 3.39 (s, 0.46H (*endo*)), 3.20 (s, 0.56H), 3.17 (s, 0.55H), 3.14 (s, 0.45H), 1.95 (d,  $J = 8.5$  Hz, 0.46H (*endo*)), 1.88 (d,  $J = 8.5$  Hz, 0.54H (*exo*)), 1.70(dd,  $J = 2.0$  Hz, 9.0 Hz, 0.46H), 1.56 (dd,  $J = 2.0$  Hz, 9.0 Hz, 0.54H), ppm;  **$^{13}\text{C NMR}$  (125 MHz,  $\text{CDCl}_3$ ):**  $\delta$  200.2, 199.3, 150.6, 149.4, 139.1, 137.2, 137.0, 136.7, 136.4, 133.3, 133.2, 132.5, 132.1, 128.9, 128.8, 128.6, 128.5, 128.4, 127.3, 119.1, 110.2, 110.0,, 56.6, 54.6, 49.3, 48.9, 48.8, 48.2, 48.0, 47.9, 47.6, 45.9 ppm.

#### **(4-Fluorophenyl)(3-(*p*-tolyl)bicyclo[2.2.1]hept-5-en-2-yl)methanone (3l)**

**Results:** 88% yield, yellow oily liquid, dr = 63:37 (*endo:exo*); **IR (ATR):**  $\nu_{\max}$  3061, 2963, 2924, 1742, 1672, 1455, 1362, 1223, 1013, 805, 713, 674  $\text{cm}^{-1}$ ;  **$^1\text{H-NMR}$  (500 MHz,  $\text{CDCl}_3$ ):**  $\delta$  7.97-7.93 (m, 1.30H (*endo*)), 7.90-7.86 (m, 0.74H (*exo*)), 7.18-7.02 (m, 6H), 6.48-6.43 (m, 1H), 6.17 (dd,  $J = 2.5$  Hz, 5.5 Hz, 0.37H (*exo*)), 5.88 (dd,  $J = 3.0$  Hz, 6.0 Hz, 0.63H (*endo*)), 3.84 (dd,  $J = 3.5$  Hz, 5.0 Hz, 0.63H (*endo*)), 3.78 (dd,  $J = 3.5$  Hz, 5.5 Hz, 0.37H (*exo*)), 3.38 (d,  $J = 4.0$  Hz, 0.63H (*endo*)), 3.34 (dd,  $J = 1.0$  Hz, 5.0 Hz, 0.37H (*exo*)), 3.31 (s, 0.63H (*endo*)),

3.15-3.10 (m, 0.75H (*exo*)), 3.09- 3.06 (m, 0.63H (*endo*)), 2.32 (s, 2H CH<sub>3</sub> (*endo*)), 2.30 (s, 1H CH<sub>3</sub> (*exo*)), 2.02 (d, *J* = 8.5 Hz, 0.63H (*endo*)), 1.88 (d, *J* = 8.5 Hz, 0.37H (*exo*)), 1.63 (dq, *J* = 1.5 Hz, 3.5 Hz, 0.63H (*endo*)), 1.54 (m, 0.37H (*exo*)) ppm; <sup>13</sup>C NMR (125 MHz, CDCl<sub>3</sub>): δ 200.0, 198.7, 165.7 (d, *J* = 253.7 Hz), 165.6 (d, *J* = 253.7 Hz), 141.6, 139.3, 137.0, 135.7, 133.7 (d, *J* = 2.5 Hz), 133.5 (d, *J* = 2.5 Hz), 133.0, 131.2 (d, *J* = 8.7 Hz), 131.1 (d, *J* = 8.7 Hz), 129.4, 129.0, 128.0, 127.5, 115.8 (d, *J* = 21.2 Hz), 115.6 (d, *J* = 21.2 Hz), 56.3, 54.7, 49.1, 48.9, 48.8, 48.6, 48.2, 48.1, 47.8, 45.9, 21.1 ppm; <sup>19</sup>F NMR (470 MHz, CDCl<sub>3</sub>): δ -105.79 (*exo*), -105.89 (*endo*) ppm.

#### (4-Chlorophenyl)(3-(*p*-tolyl)bicyclo[2.2.1]hept-5-en-2-yl)methanone (3m)

**Results:** 87% yield, yellow oily liquid, dr = 73:27 (*endo:exo*); IR (ATR):  $\nu_{\max}$  3052, 2962, 2921, 1731, 1672, 1581, 1362, 1212, 1013, 804, 712, 674 cm<sup>-1</sup>; <sup>1</sup>H-NMR (500 MHz, CDCl<sub>3</sub>): δ 7.85 (dt, *J* = 2.5 Hz, 9.0 Hz, 1.54H (*endo*)), 7.78 (dt, *J* = 2.5 Hz, 9.5 Hz, 0.57H (*exo*)), 7.39 (dt, *J* = 2.5 Hz, 9.5 Hz, 1.55H (*endo*)), 7.34 (dt, *J* = 2.5 Hz, 9.5 Hz 0.62H (*exo*)), 7.19- 7.02 (m, 4H), 6.45 (m, 1H), 6.16 (dd, *J* = 3.0 Hz, 5.5 Hz, 0.27H (*exo*)) 5.86 (dd, *J* = 3.0 Hz, 6.0 Hz, 0.73H (*endo*)), 3.82 (dd, *J* = 3.5 Hz, 5.0 Hz, 0.73H (*endo*)), 3.76 (dd, *J* = 3.0 Hz, 5.5 Hz, 0.27H (*exo*)), 3.37 (d, *J* = 4.0 Hz, 0.72H (*endo*)), 3.33 (dd, *J* = 1.5 Hz, 5.5 Hz, 0.27H (*exo*)), 3.29 (s, 0.73H (*endo*)), 3.14-3.10 (m, 0.59H), 3.08-3.06 (m, 0.73H (*endo*)), 2.32 (s, 2H, CH<sub>3</sub> (*endo*)), 2.30 (s, 1H, CH<sub>3</sub> (*exo*)), 2.01 (d, *J* = 8.5 Hz, 0.73H (*endo*)), 1.87 (d, *J* = 9.0 Hz, 0.27H (*exo*)), 1.63 (dd, *J* = 3.5 Hz, 10.5 Hz, 0.72H (*endo*)), 1.42 (s, 0.27H (*exo*)) ppm; <sup>13</sup>C NMR (125 MHz, CDCl<sub>3</sub>): δ 200.5, 199.1, 141.3, 139.4, 139.3, 137.0, 136.5, 135.8, 135.7, 133.0, 130.0, 129.9, 129.4, 129.0, 129.0, 128.9, 128.0, 127.5, 56.4, 54.7, 49.2, 49.0, 48.7, 48.6, 48.2, 48.1, 45.9, 21.1 ppm.

#### 4-Bromophenyl-(3-(*p*-tolyl)bicyclo[2.2.1]hept-5-en-2-yl)methanone (3n)

**Results:** 86% yield, yellow oily liquid, dr = 66:34 (*endo:exo*); IR (ATR):  $\nu_{\max}$  2951, 2923, 2851, 1741, 1585, 1457, 1371, 1212, 1025, 803, 721, 682 cm<sup>-1</sup>; <sup>1</sup>H-NMR (500 MHz, CDCl<sub>3</sub>): δ 7.77 (dt, *J* = 2.0 Hz, 9.0 Hz, 1.37H (*endo*)), 7.70 (dt, *J* = 2.0 Hz, 9.0 Hz, 0.69H (*exo*)), 7.56 (dt, *J* = 2.5 Hz, 9.5 Hz, 1.34H (*endo*)), 7.50 (dt, *J* = 2.0 Hz, 9.0 Hz, 0.68H (*exo*)), 7.17-7.01 (m, 4H), 6.47-6.42 (m, 1H), 6.16 (dd, *J* = 2.8 Hz, 5.6 Hz, 0.34H (*exo*)), 5.86 (dd, *J* = 2.8 Hz, 5.6 Hz, 0.66H (*endo*)), 3.81 (dd, *J* = 3.4 Hz, 5.0 Hz, 0.66H), 3.75 (dd, *J* = 3.5 Hz, 5.5 Hz, 0.34H), 3.37 (d, *J* = 4.0 Hz, 0.66H (*endo*)), 3.31 (dd, *J* = 1.5 Hz, 5.4 Hz, 0.34H (*exo*)), 3.29 (s, 0.66H (*endo*)), 3.11 (d, *J* = 8.0 Hz, 0.90H (*exo*)), 3.06 (s, 0.55H (*endo*)), 2.32 (s, 2H, CH<sub>3</sub> (*endo*)), 2.30 (s, 1H, CH<sub>3</sub> (*exo*)), 2.01 (d, *J* = 8.5 Hz, 0.66H (*endo*)), 1.86 (d, *J* = 8.6 Hz, 0.34H (*exo*)),

1.63(dd,  $J = 3.4$  Hz, 10.5 Hz, 1H) ppm;  $^{13}\text{C}$  NMR (125 MHz,  $\text{CDCl}_3$ ):  $\delta$  200.5, 198.7, 141.6, 138.6, 137.1, 136.0, 135.8, 133.0, 132.0, 131.9, 131.9, 130.2, 130.1, 129.4, 129.0, 128.0, 127.5, 56.3, 49.2, 49.0, 48.7, 48.6, 48.6, 48.2, 48.1, 47.9, 45.9, 29.8, 21.1 ppm.

#### 4-Methoxyphenyl(3-(*p*-tolyl)bicyclo[2.2.1]hept-5-en-2-yl)methanone (3o)

**Results:** 84% yield, yellow oily liquid, dr = 59:41 (*endo:exo*); **IR (ATR):**  $\nu_{\text{max}}$  3012, 2963, 2934, 1732, 1669, 1592, 1457, 1367, 1225, 1027, 837, 719, 689  $\text{cm}^{-1}$ ;  **$^1\text{H}$ -NMR (500 MHz,  $\text{CDCl}_3$ ):**  $\delta$  7.92 (dt,  $J = 2.0, 10.0$  Hz, 1.23H (*endo*)), 7.86 (dt,  $J = 2.5$  Hz, 9.5 Hz, 0.84H (*exo*)), 7.19-7.08 (m, 2.5H (*endo*)), 7.04 (s, 1.6H (*exo*)), 6.90 (dd,  $J = 2.0$  Hz, 7.0 Hz, 1.25H (*endo*)), 6.86 (dd,  $J = 2.5$  Hz, 7.0 Hz, 0.80H (*exo*)), 6.47-6.43 (m, 1H), 6.16 (dd,  $J = 3.0$  Hz, 5.5 Hz, 0.41H (*exo*)), 5.88 (dd,  $J = 2.5$  Hz, 5.6 Hz, 0.59H (*endo*)), 3.86 (s, 1.8H  $-\text{OCH}_3$  (*endo*)), 3.85-3.82 (m, 2.2H {1.2H,  $-\text{OCH}_3$ , (*exo*) + 1H (*endo* + *exo*)}), 3.42 (d,  $J = 4.3$  Hz, 0.59H (*endo*)), 3.35 (dd,  $J = 1.4$  Hz, 5.0 Hz, 0.41H (*exo*)), 3.31 (s, 0.59H (*endo*)), 3.13 (s, 0.41H (*exo*)), 3.07 (d,  $J = 1.5$  Hz, 0.59H), 2.31 (s, 1.8H,  $\text{CH}_3$  (*endo*)), 2.29 (s, 1.2H,  $\text{CH}_3$  (*exo*)), 2.01 (d,  $J = 8.4$  Hz, 0.59H (*endo*)), 1.90 (d,  $J = 8.6$  Hz, 0.41H (*exo*)), 1.62 (dd,  $J = 1.6$  Hz, 8.5 Hz, 0.59H), 1.52 (dd,  $J = 1.6$  Hz, 8.5 Hz, 0.41H) ppm;  $^{13}\text{C}$  NMR (125 MHz,  $\text{CDCl}_3$ ):  $\delta$  200.0, 198.6, 163.4, 163.4, 141.9, 140.7, 139.2, 136.9, 136.7, 135.8, 135.6, 133.1, 130.9, 130.8, 130.3, 130.2, 129.3, 128.9, 128.0, 127.5, 113.8, 113.8, 55.9, 55.6, 55.6, 54.3, 49.1, 48.9, 48.8, 48.8, 48.1, 48.1, 47.6, 45.7, 29.8, 21.1, 21.1 ppm.

**Copies of  $^1\text{H}$ -NMR spectra of CDs,  
Amino acids and Inclusion Complexes  
&  
Copies of  $^1\text{H}$  and  $^{13}\text{C}$  NMR Spectra of  
DA adducts**

cat D2O nmr  
B-CD  
1H\_8scan D2O {D:\Spectra} nmr 42

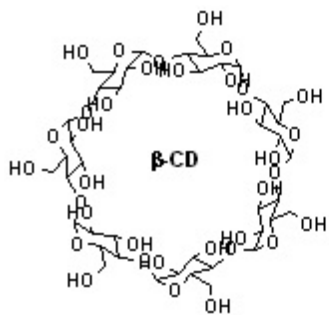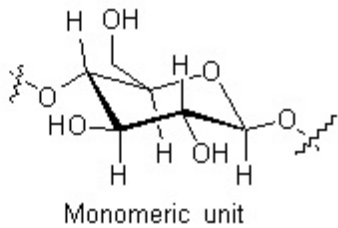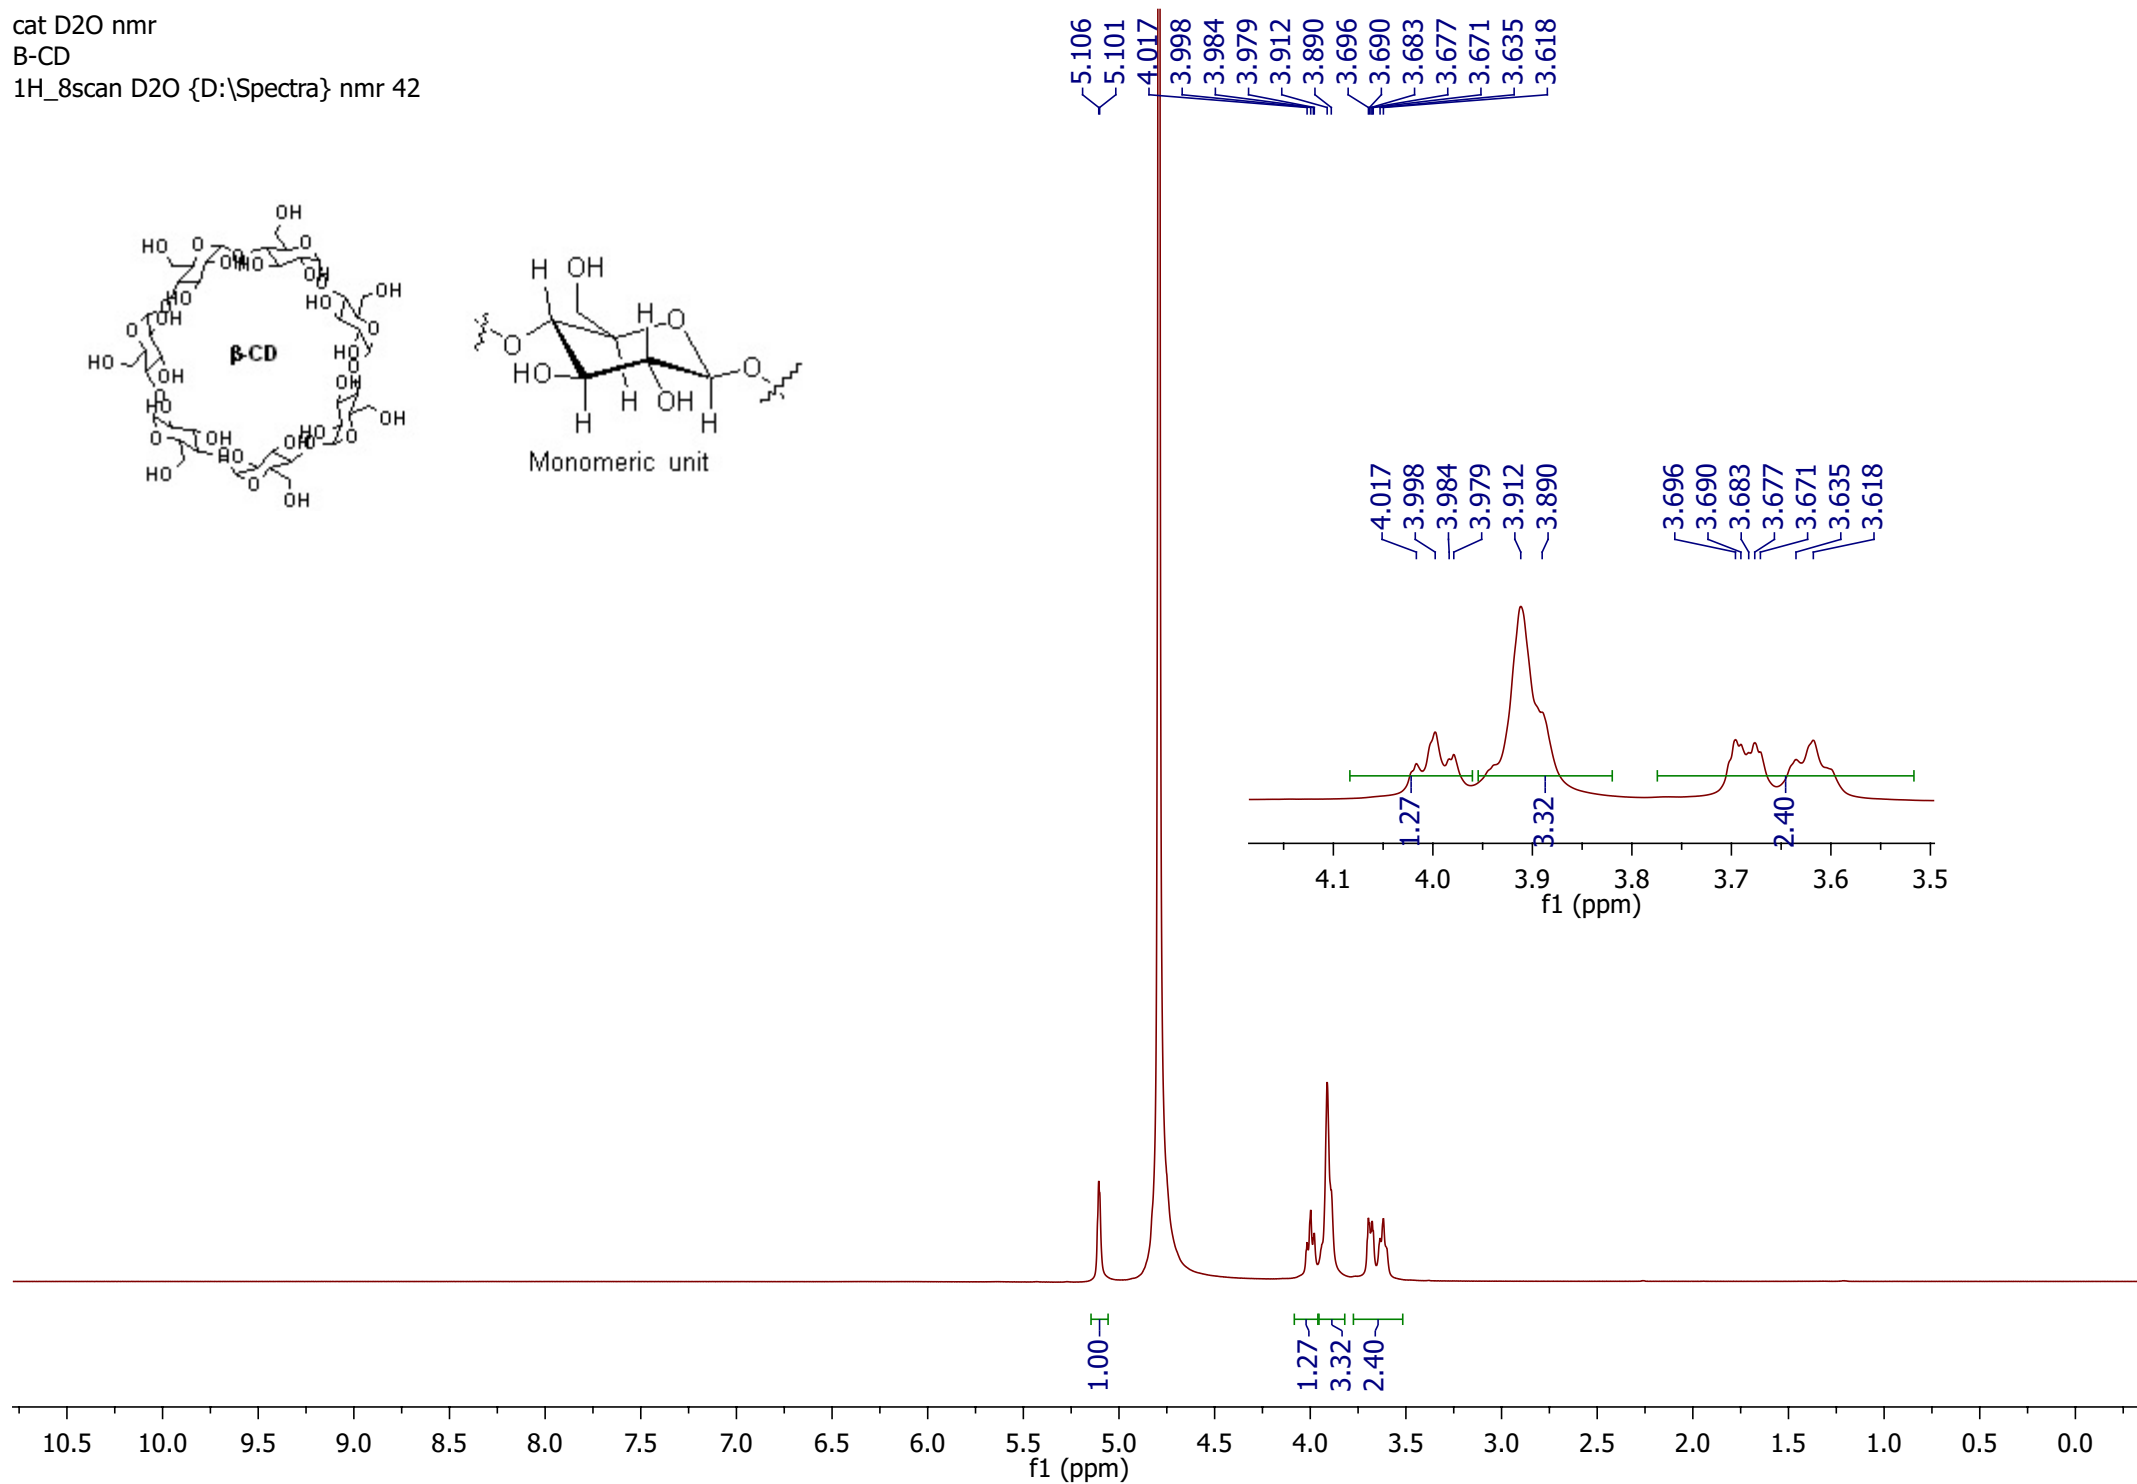

cat D2O nmr  
A-CD  
1H\_8scan D2O {D:\Spectra} nmr 8

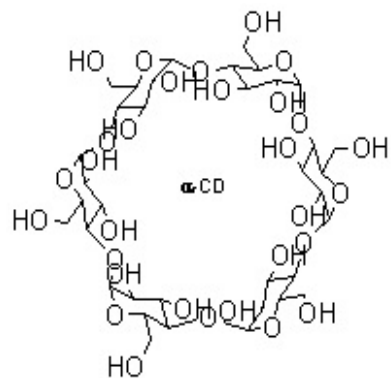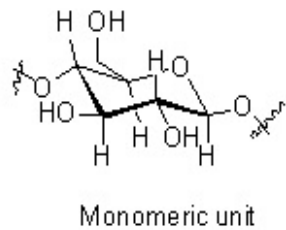

5.094  
5.088  
4.036  
4.018  
3.999  
3.962  
3.941  
3.915  
3.906  
3.887  
3.871  
3.685  
3.678  
3.664  
3.658  
3.639  
3.621  
3.602

4.036  
4.018  
3.999  
3.962  
3.941  
3.915  
3.906  
3.887  
3.871  
3.685  
3.678  
3.664  
3.658  
3.639  
3.621  
3.602

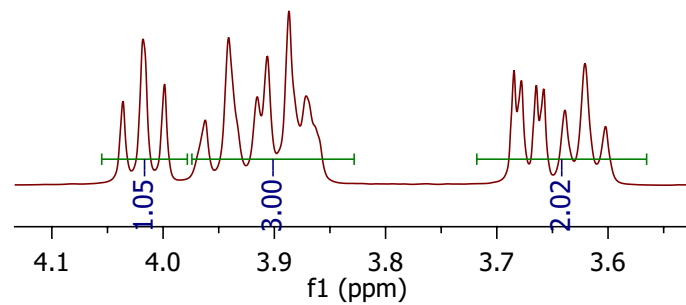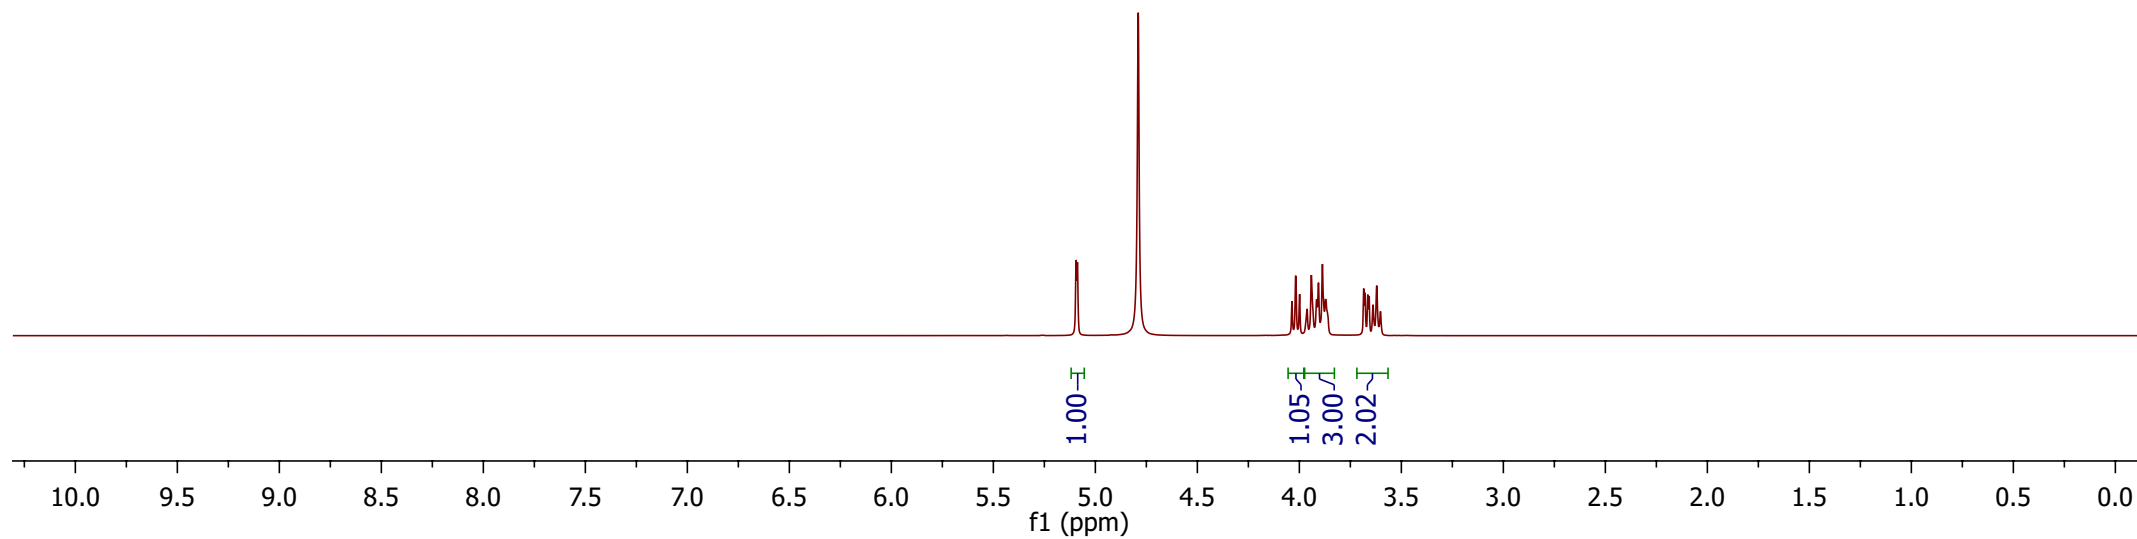

cat D2O nmr  
L-HIS  
1H\_8scan D2O {D:\Spectra} nmr 41

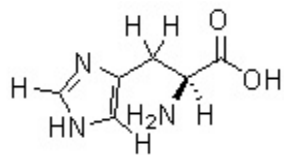

7.720  
7.717

7.020

4.790

3.968  
3.959  
3.952  
3.943  
3.216  
3.215  
3.207  
3.206  
3.185  
3.185  
3.176  
3.175  
3.112  
3.096  
3.081  
3.065

3.968  
3.959  
3.952  
3.943

3.216  
3.207  
3.206  
3.185  
3.185  
3.176  
3.175  
3.112  
3.096  
3.081  
3.065

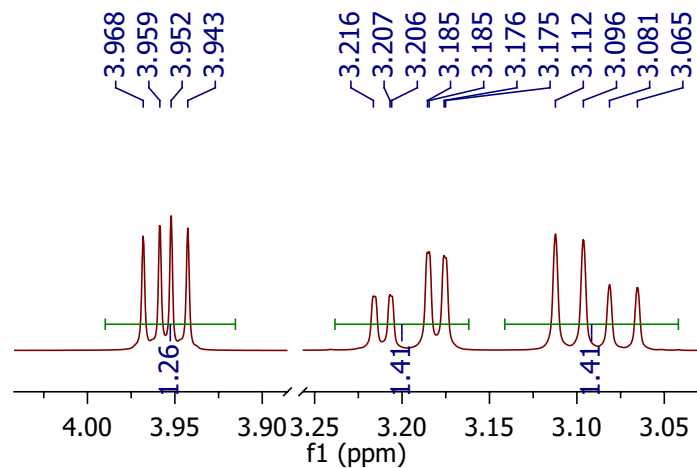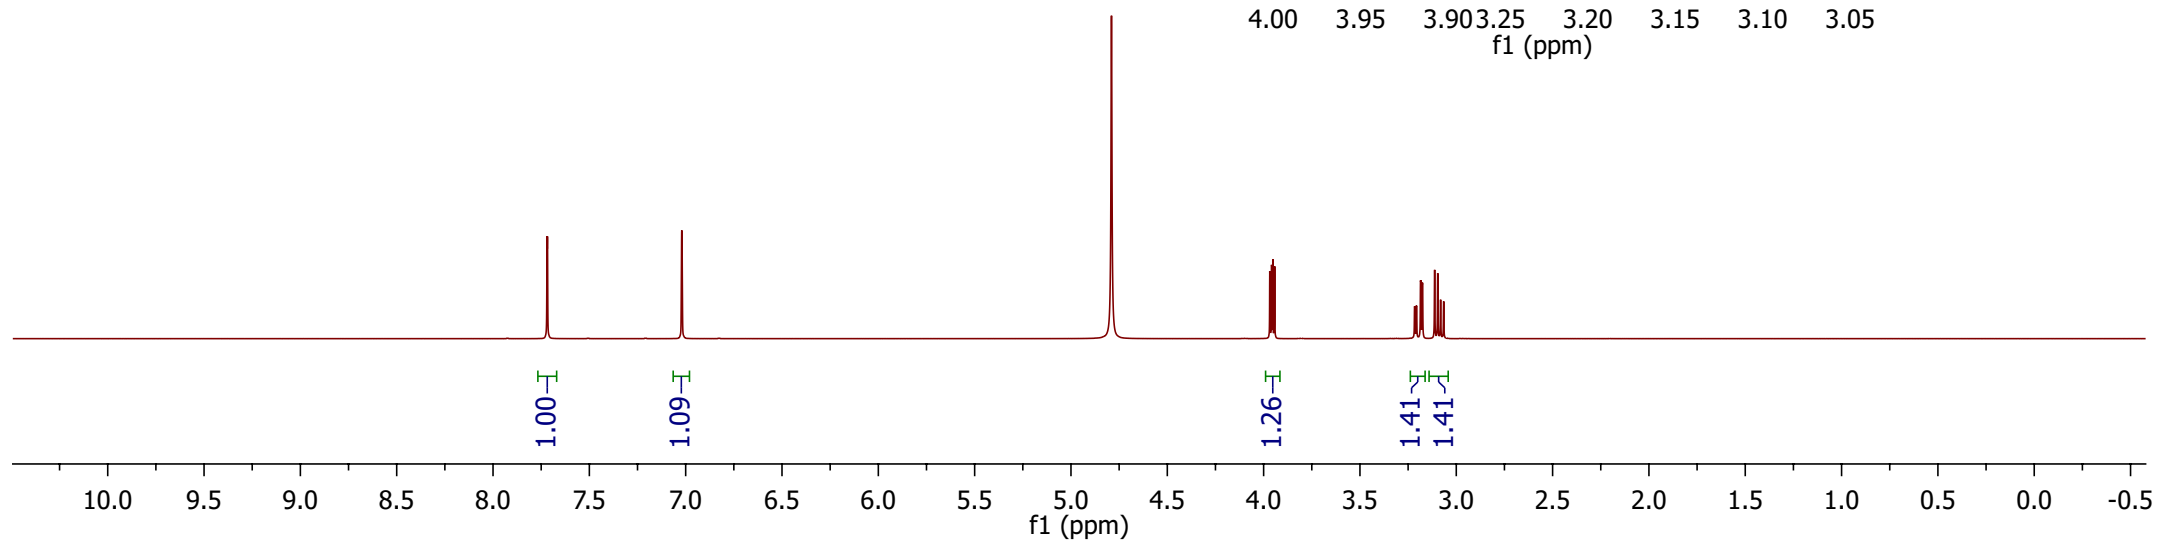

cat D2O nmr  
AJ-1  
1H\_8scan D2O {D:\Spectra} nmr 43

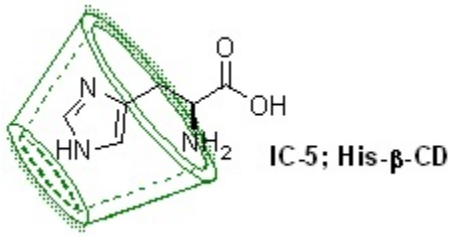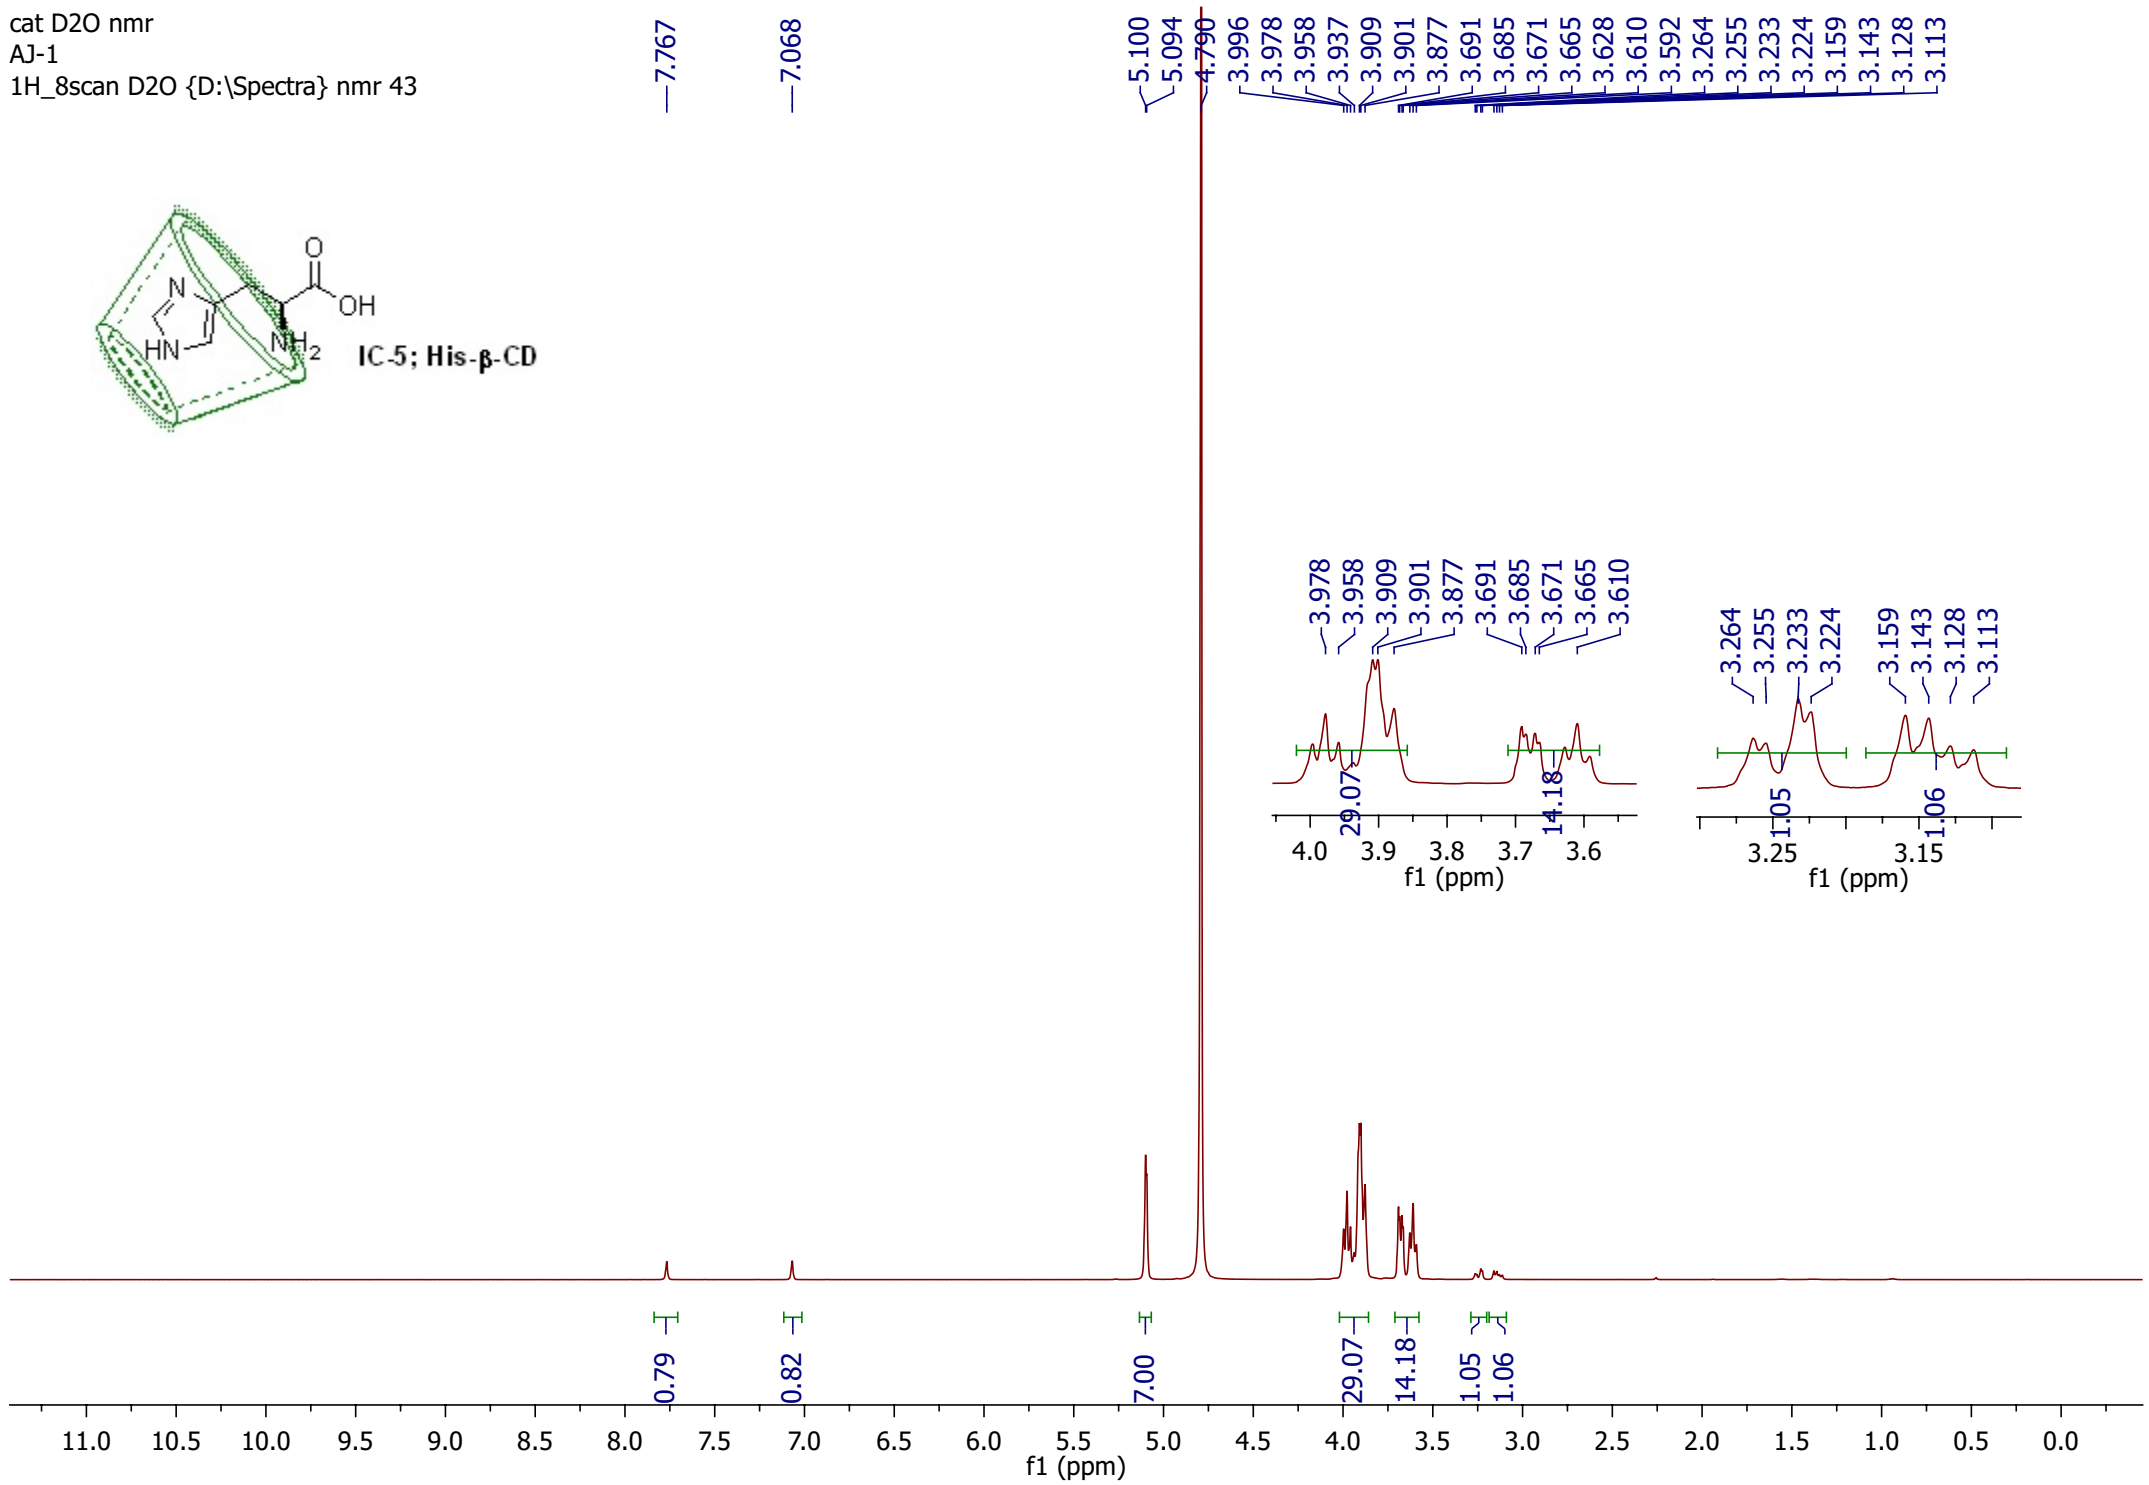

cat D2O nmr  
AJ-2  
1H\_8scan D2O {D:\Spectra} nmr 4

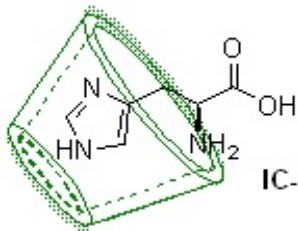

IC-6; His- $\alpha$ -CD

7.765  
7.763

7.068

5.087  
5.080

4.008  
4.006  
3.989  
3.934  
3.901  
3.880  
3.675  
3.669  
3.649  
3.640  
3.260  
3.251  
3.250  
3.229  
3.229  
3.220  
3.219  
3.157  
3.141  
3.126  
3.110

4.026  
4.008  
4.006  
3.989  
3.934  
3.910  
3.901  
3.880  
3.675  
3.669  
3.655  
3.649  
3.615  
3.260  
3.260  
3.251  
3.250  
3.229  
3.229  
3.220  
3.219  
3.157  
3.141  
3.126  
3.110

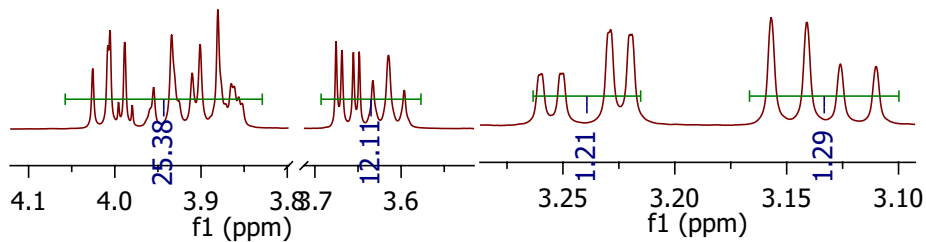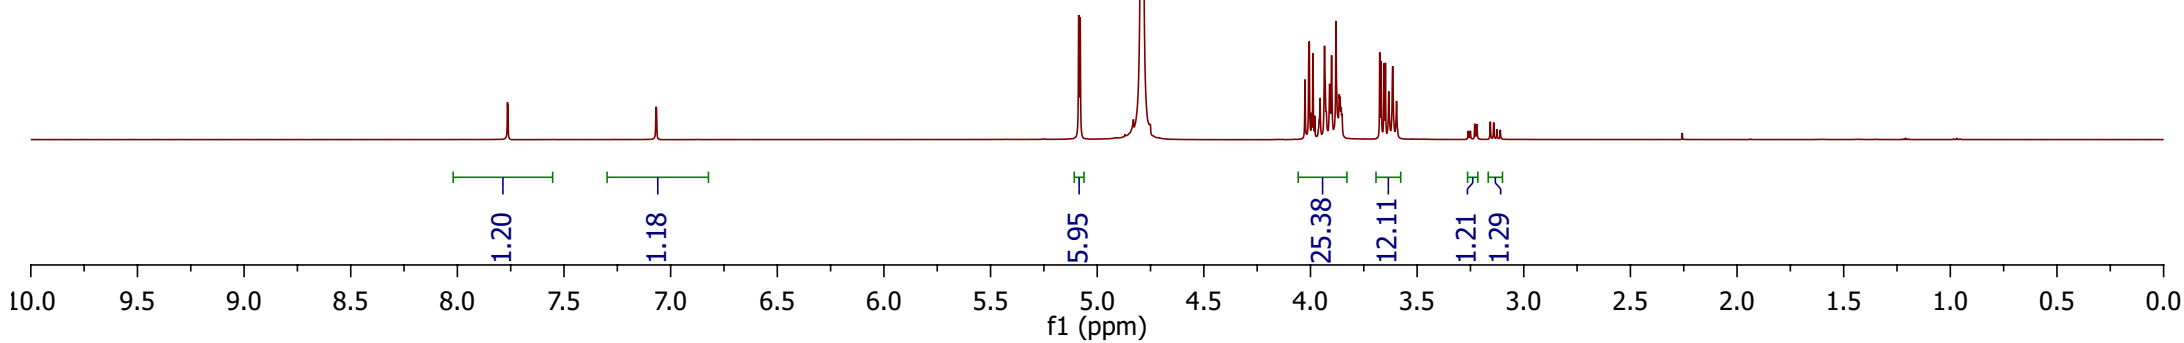

cat D2O nmr  
Phe  
1H\_8scan D2O {D:\Spectra} nmr 7

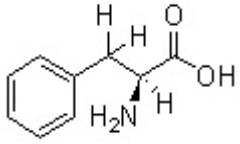

7.447  
7.434  
7.407  
7.394  
7.353  
7.340

4.790

4.006

3.315  
3.295  
3.159  
3.144

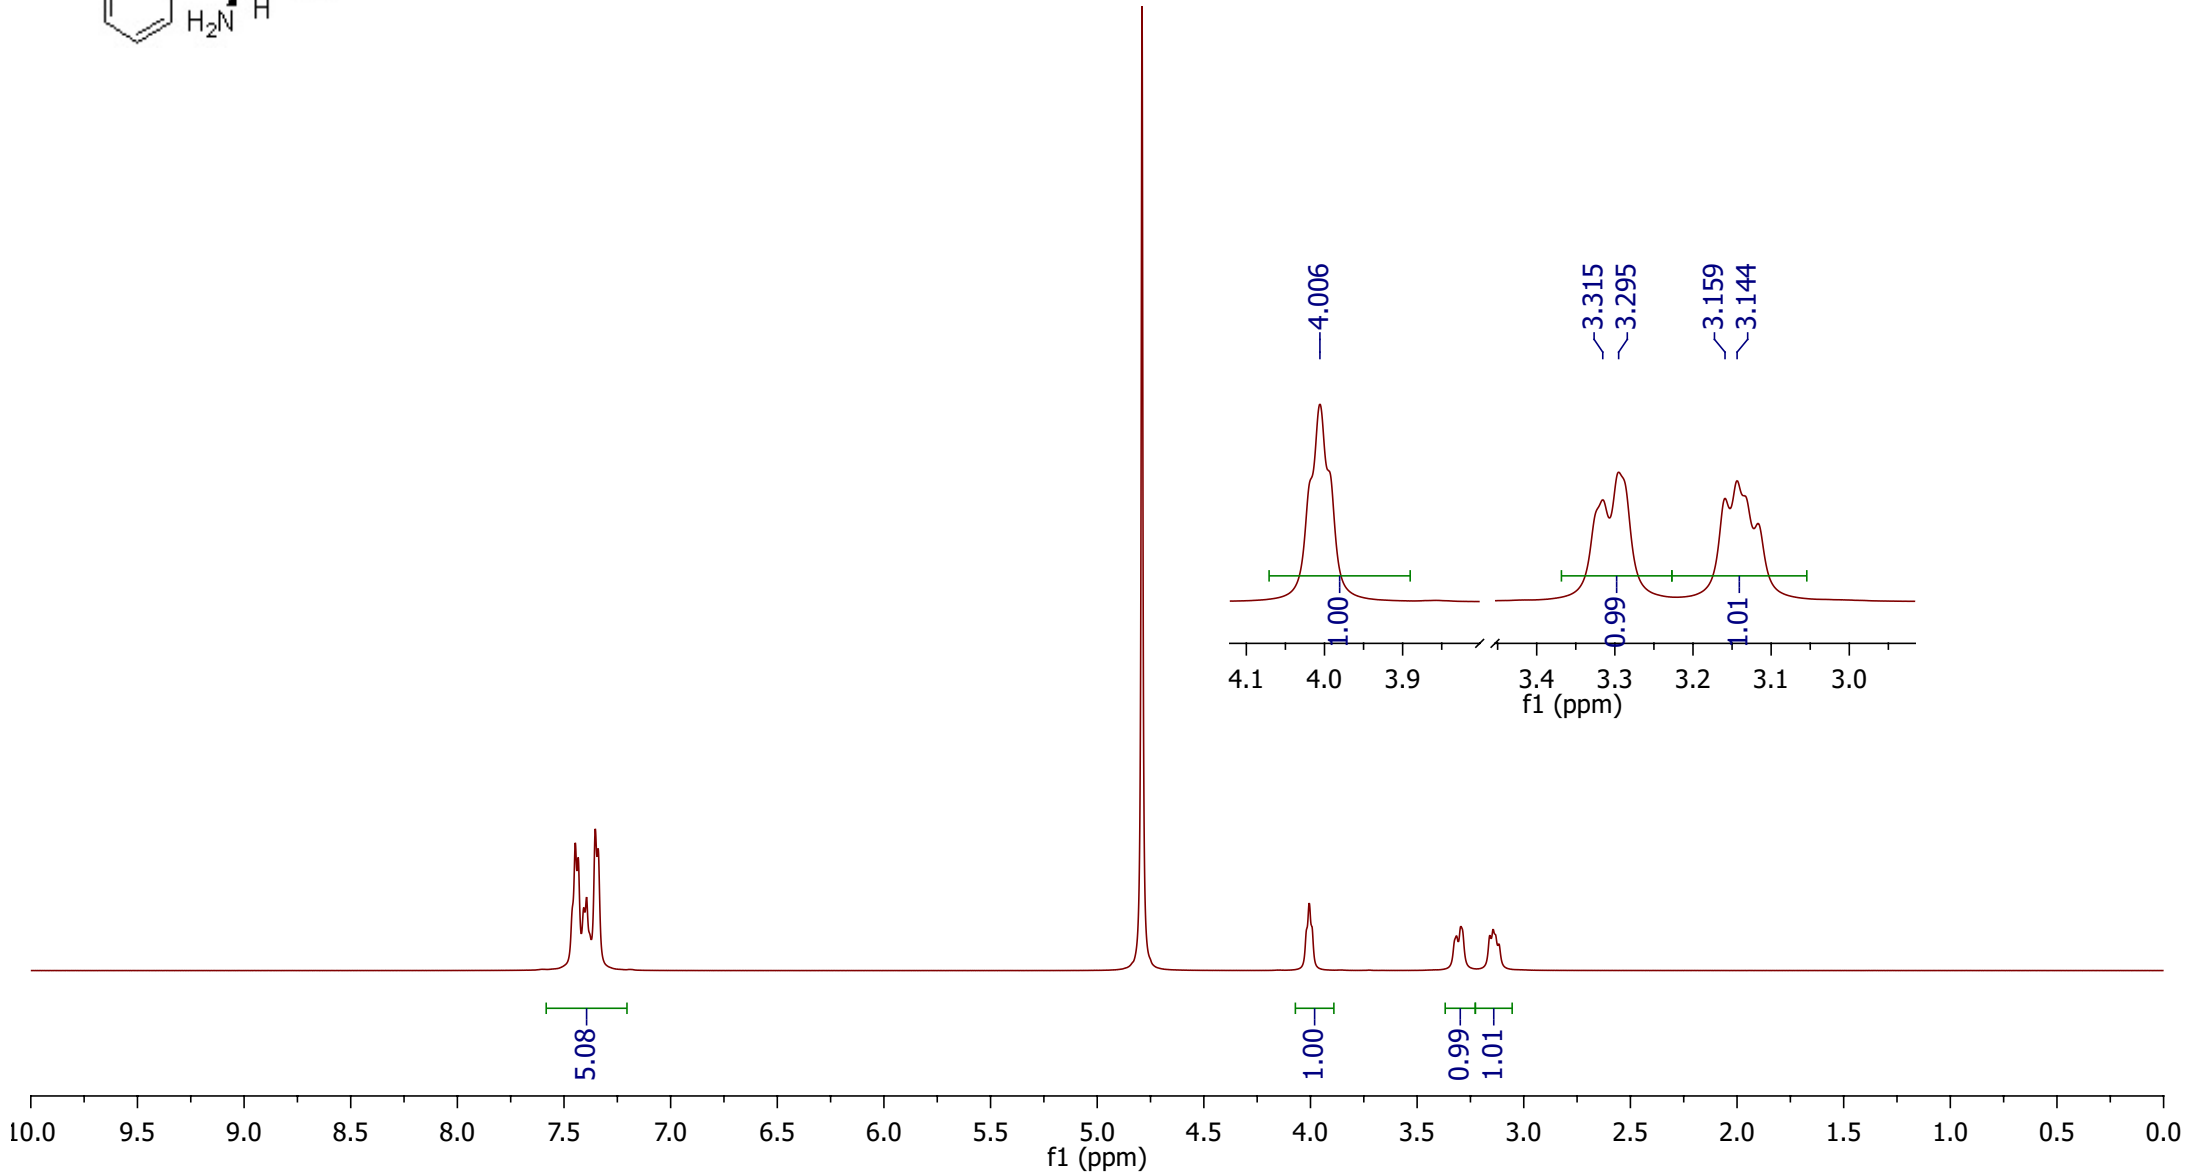

divya  
AJ-3  
1H\_8scan D2O {D:\Spectra} nmr 13

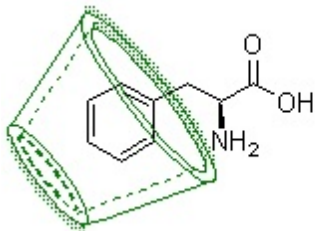

IC-8; Phe- $\beta$ -CD

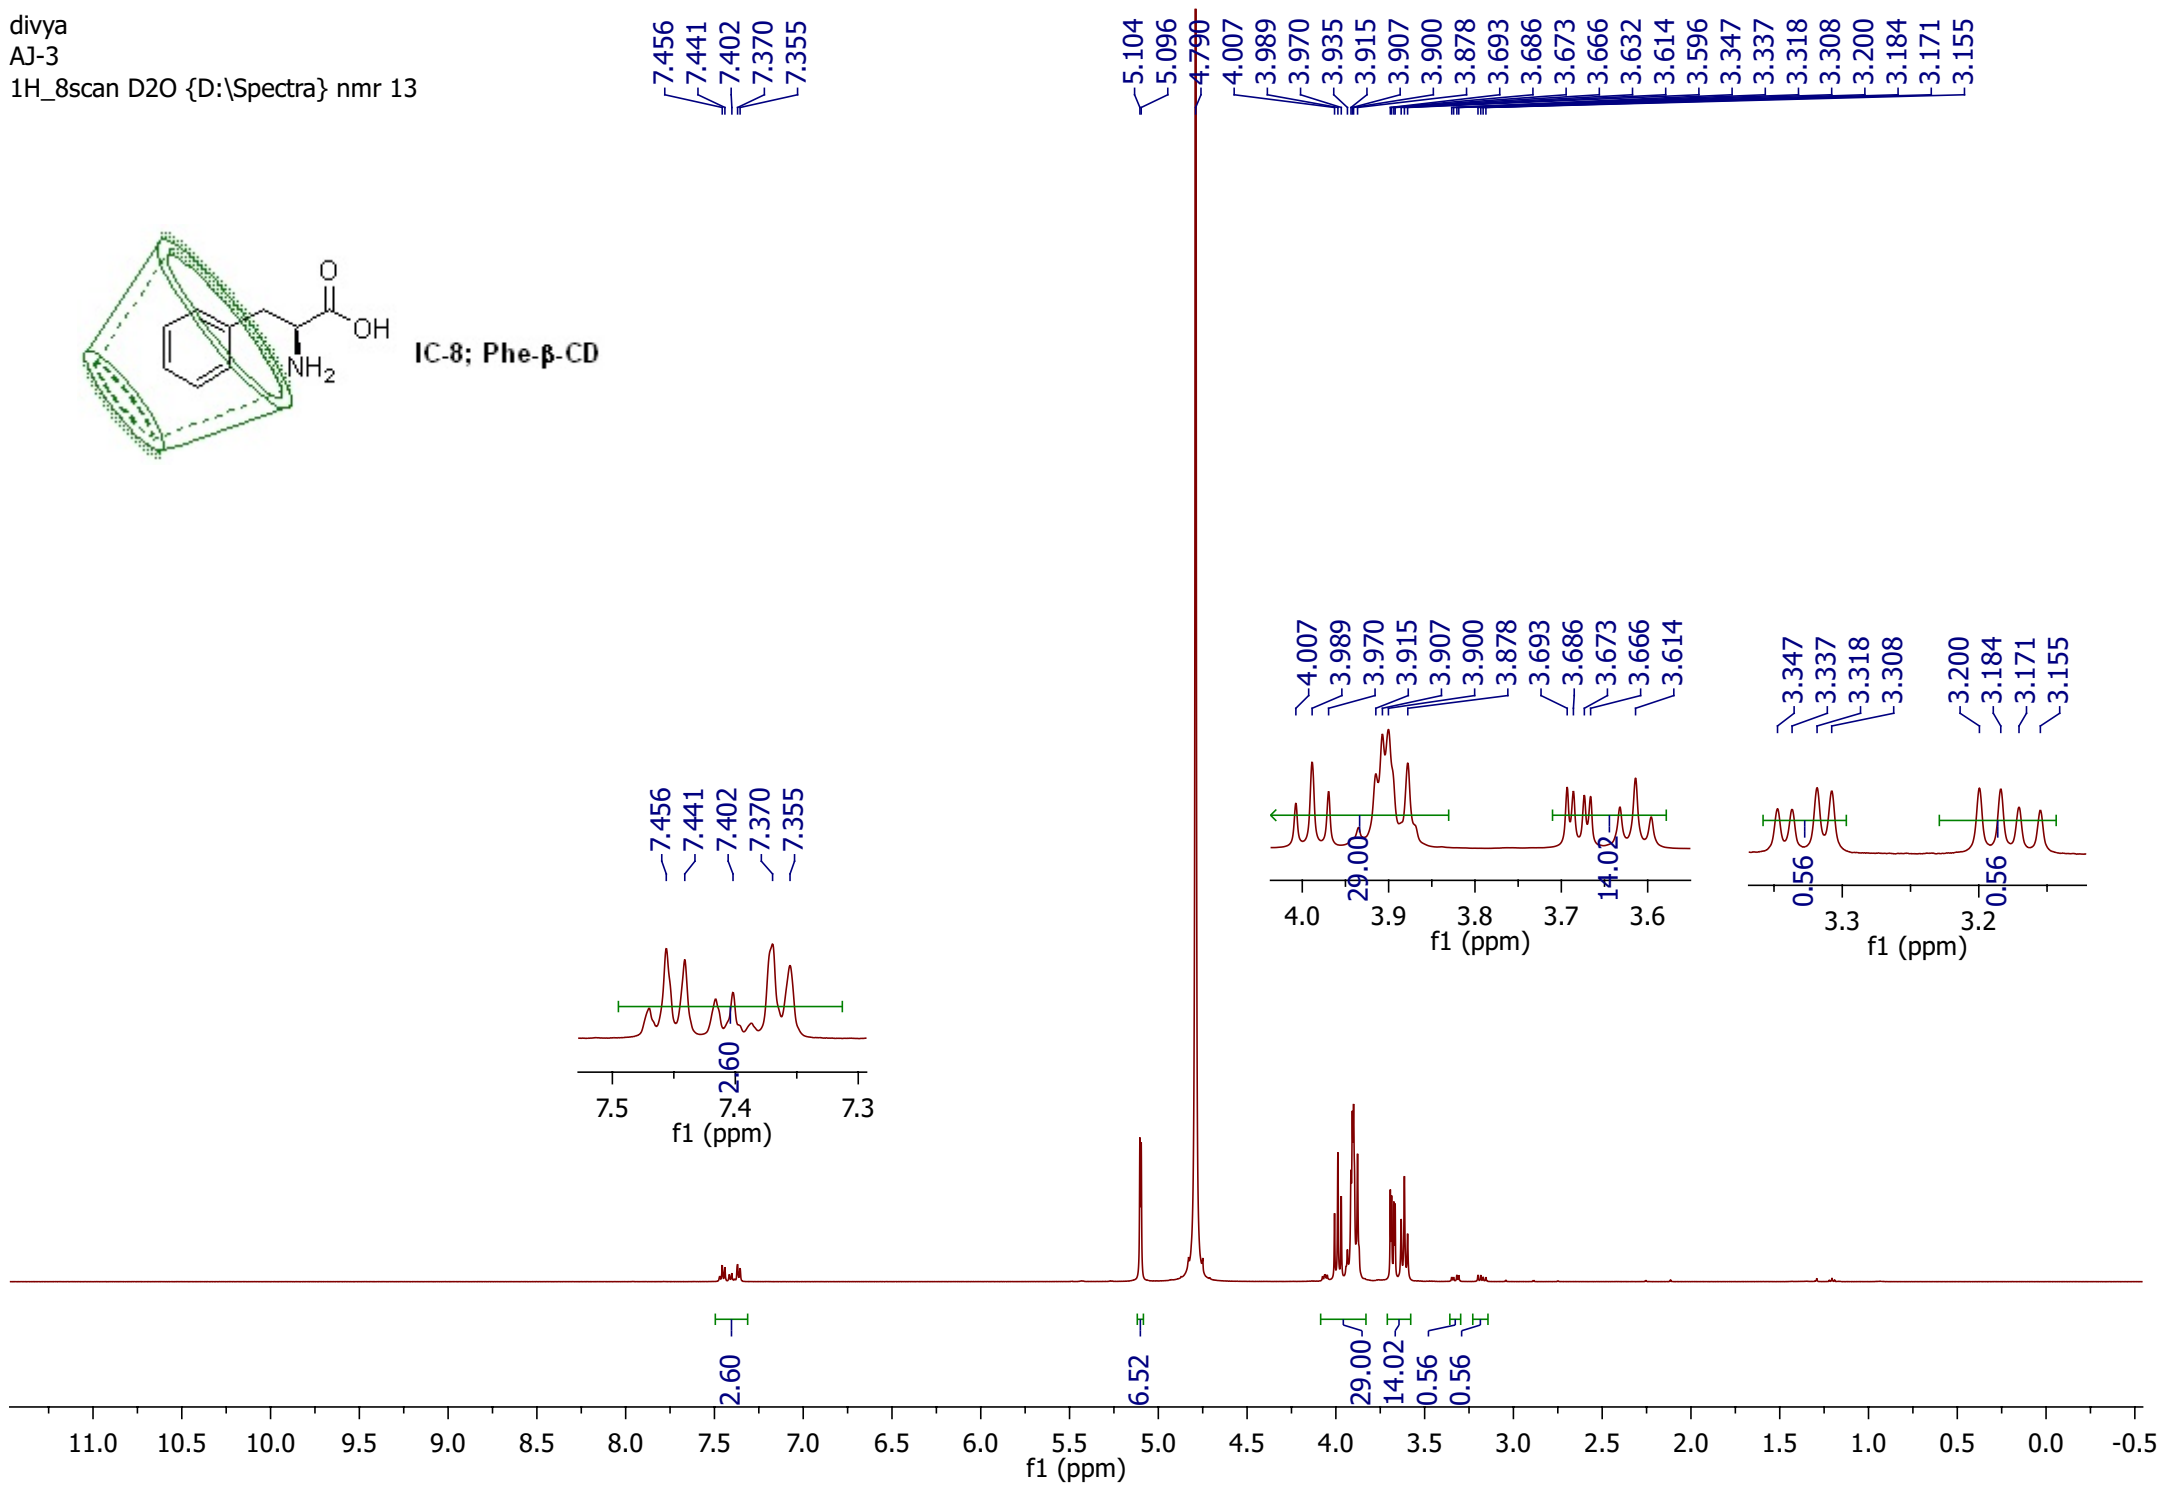

cat D2O nmr  
AJ-4  
1H\_8scan D2O {D:\Spectra\ nmr.6

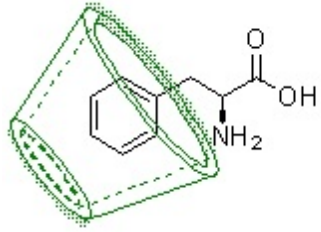

IC-9; Phe- $\alpha$ -CD

7.478  
7.464  
7.449  
7.419  
7.405  
7.372  
7.357

7.478  
7.464  
7.449  
7.419  
7.405  
7.372  
7.357

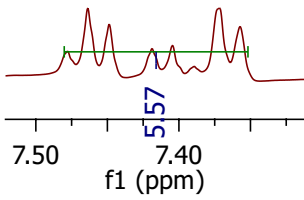

5.085  
5.079

4.014  
3.995  
3.976  
3.936  
3.912  
3.903  
3.882  
3.865  
3.674  
3.667  
3.654  
3.647  
3.613  
3.324  
3.306  
3.295  
3.181  
3.165  
3.152  
3.136

4.014  
3.995  
3.976  
3.936  
3.912  
3.903  
3.882  
3.674  
3.667  
3.654  
3.647  
3.613  
3.324  
3.306  
3.295  
3.181  
3.165  
3.152  
3.136

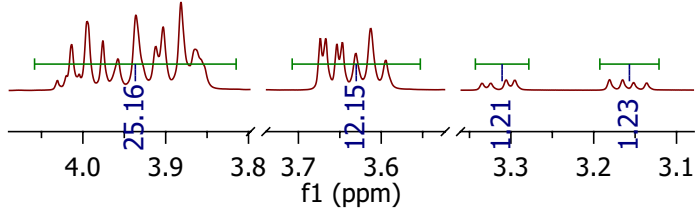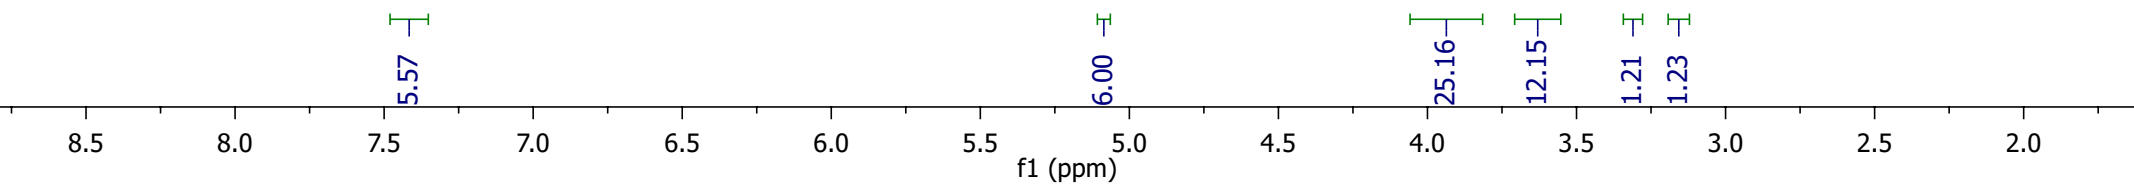

Mar 05 2024  
D:\198-91103  
1H Scan C:\3-D\Spectra\hmr\_23

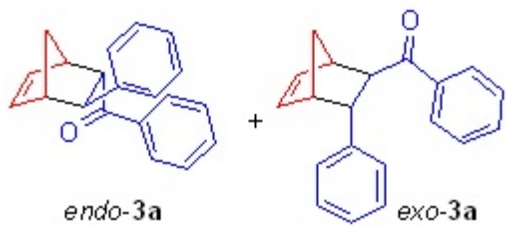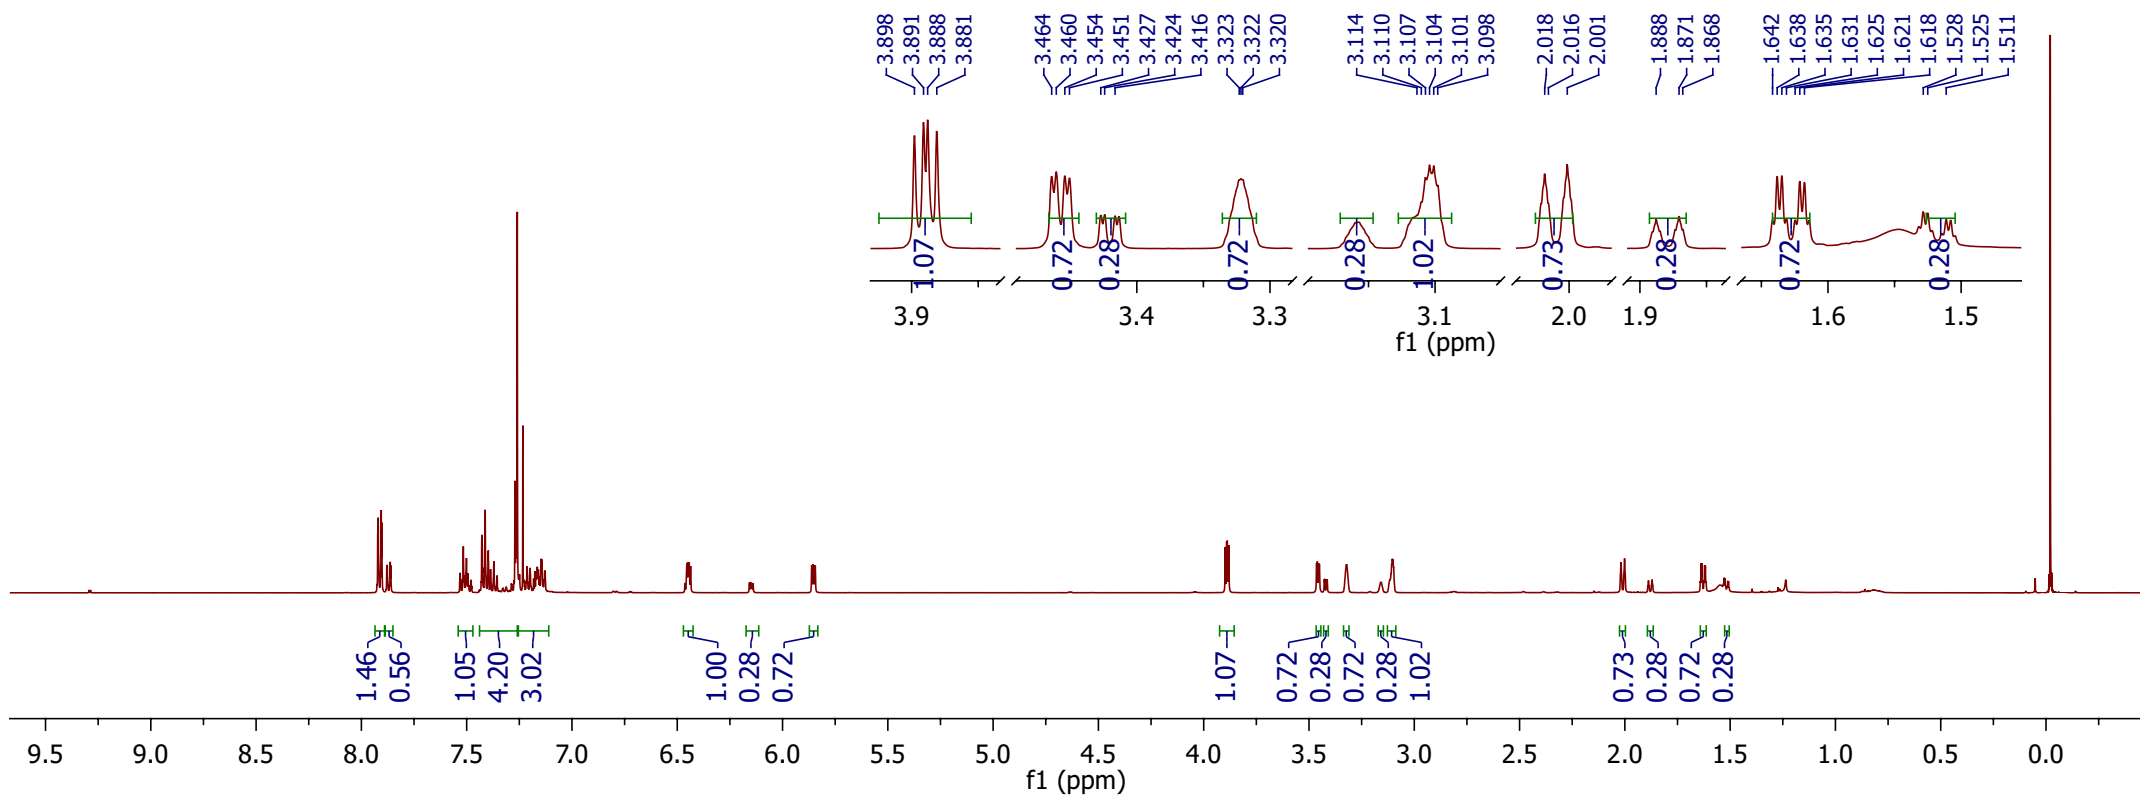

Mar05-2024  
DT-198  
C13CPD CDCl3 {D:\Spectra} nmr 23

144.8  
143.6  
139.3  
137.4  
137.1  
137.0  
136.6  
133.1  
133.0  
132.9  
128.7  
128.6  
128.5  
128.3  
128.2  
127.6  
126.3  
126.1

77.4  
77.2  
76.9

56.3  
54.6  
49.0  
48.9  
48.7  
48.6  
48.1  
48.0  
47.8  
46.0

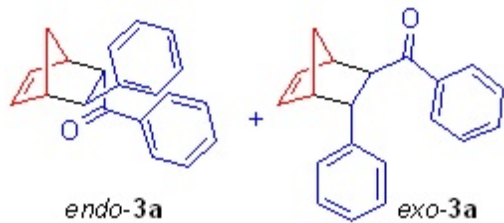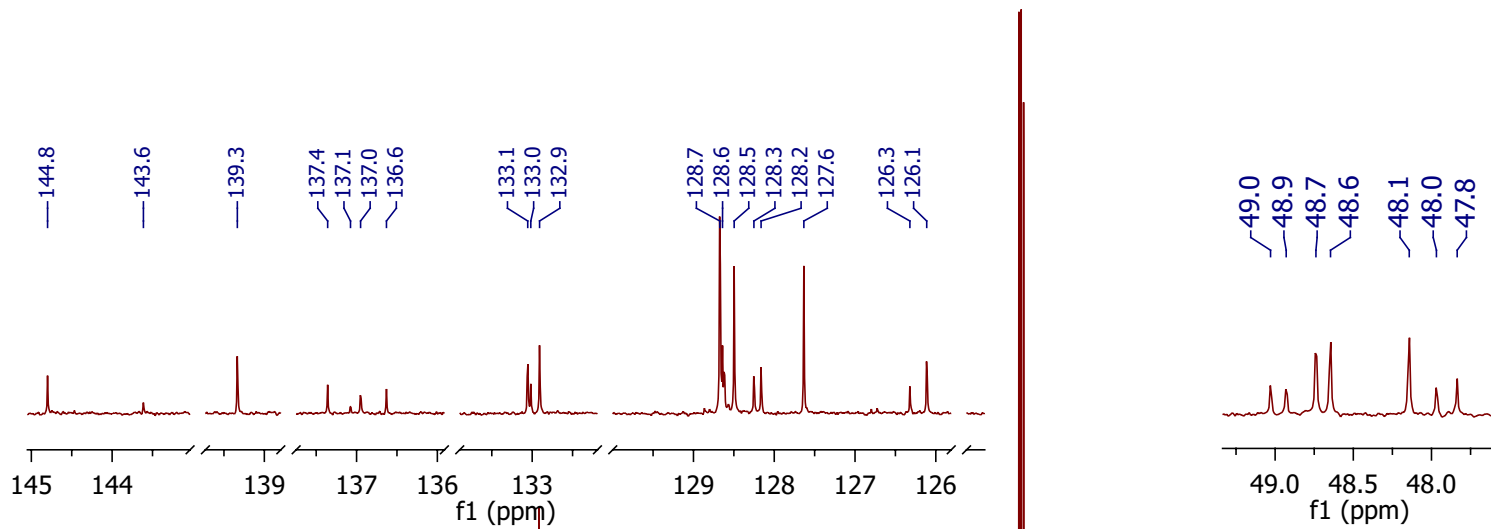

210 200 190 180 170 160 150 140 130 120 110 100 90 80 70 60 50 40 30 20 10 0 -10

f1 (ppm)



DA SUBSTRATES  
 DT-273  
 C13CPD CDCI3 (DMSO-d6) Spectra nmr 6

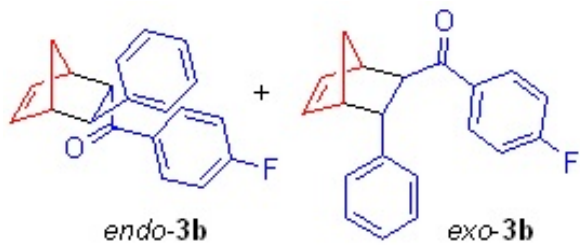

199.99  
 198.99  
 166.7  
 164.7  
 139.4  
 137.0  
 133.0  
 131.3  
 131.1  
 131.1  
 128.7  
 128.3  
 128.1  
 127.6  
 126.5  
 118.8  
 115.8  
 115.6

77.4  
 77.2  
 76.9

56.2  
 54.6  
 49.1  
 48.8  
 48.7  
 48.7  
 48.2  
 48.1  
 46.2

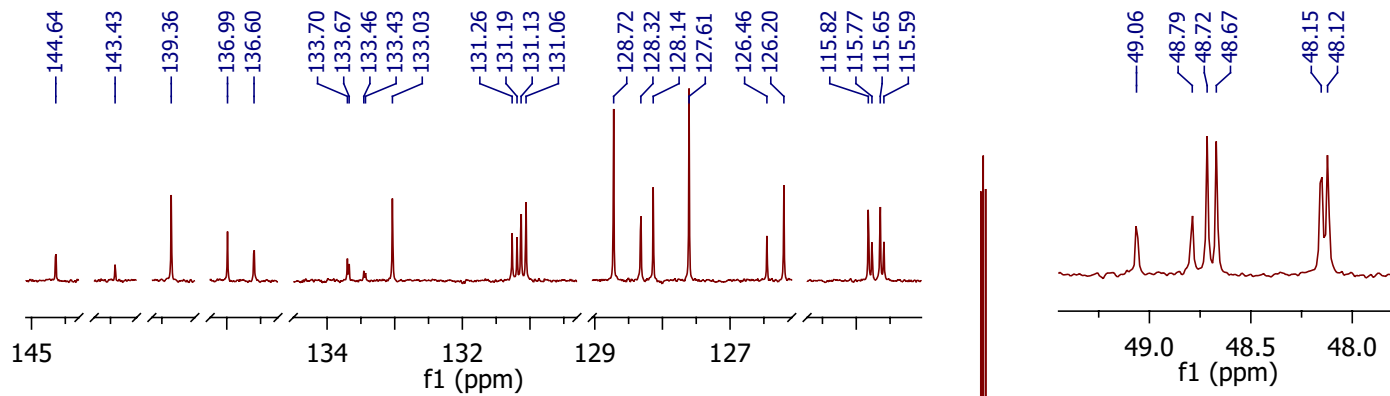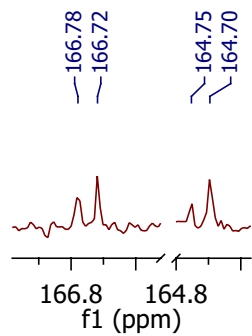

220  
 210  
 200  
 190  
 180  
 170  
 160  
 150  
 140  
 130  
 120  
 110  
 100  
 90  
 80  
 70  
 60  
 50  
 40  
 30  
 20  
 10  
 0  
 f1 (ppm)

DA SUBSTRATES  
D7-26  
1H scan CDCl3 (D:\Spectra\hmr 7

7.856  
7.854  
7.852  
7.848  
7.799  
7.797  
7.783  
7.781  
7.412  
7.407  
7.403  
7.394  
7.390  
7.350  
7.346  
7.337  
7.333  
7.310  
7.295  
7.285  
7.281  
7.273  
7.270  
7.265  
7.256  
7.242  
7.239  
7.227  
7.211  
7.208  
7.194  
7.181  
7.153  
7.150  
7.136  
7.136  
6.470  
6.463  
6.459  
6.452  
5.881  
5.876  
5.870  
5.864  
3.856  
3.849  
3.846  
3.839  
3.822  
3.815  
3.812  
3.805  
3.437  
3.435  
3.428  
3.425  
3.366  
3.363  
3.355  
3.352  
3.311  
3.162  
3.126  
3.113  
3.110  
2.035  
2.018  
1.886  
1.868  
1.664  
1.661  
1.647  
1.644

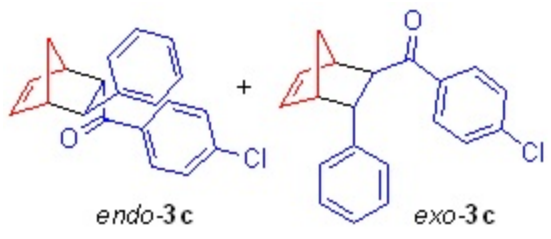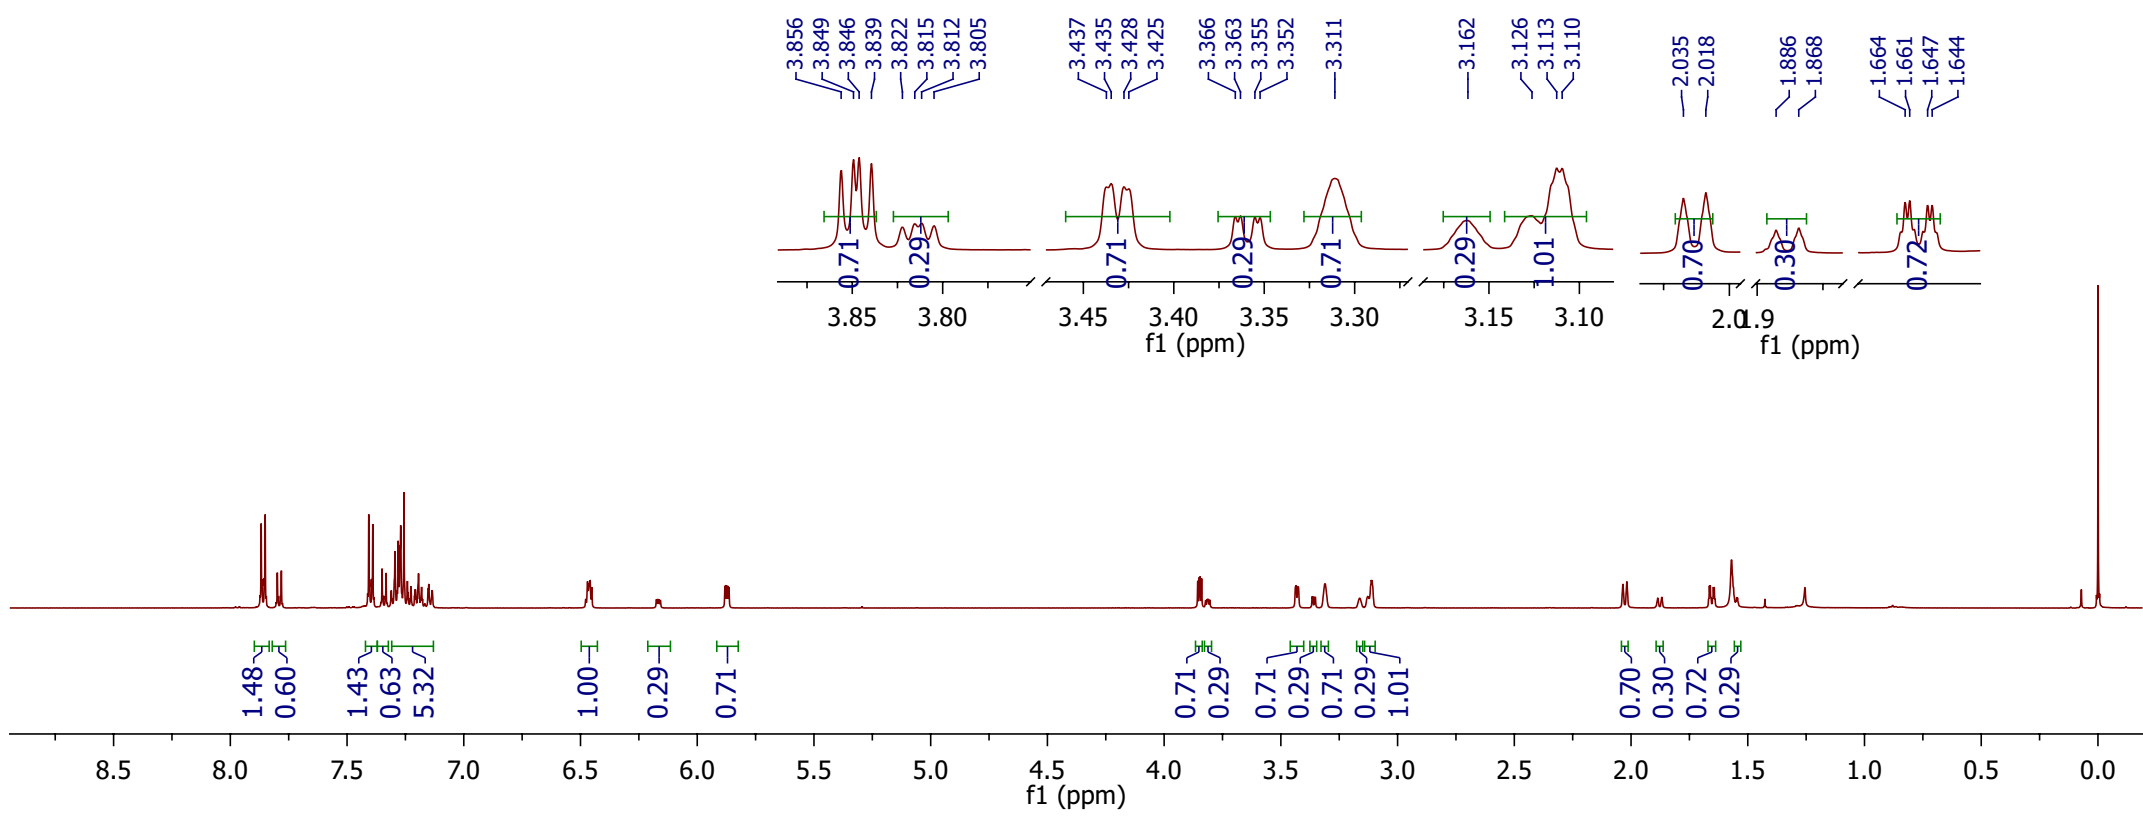

DA SUBSTRATES asymm Nmrs  
DT-274  
C13CPD CDCI3 (D) Spectra nmr 7

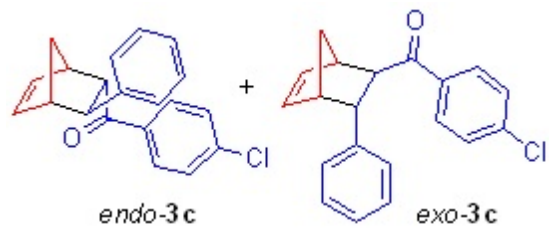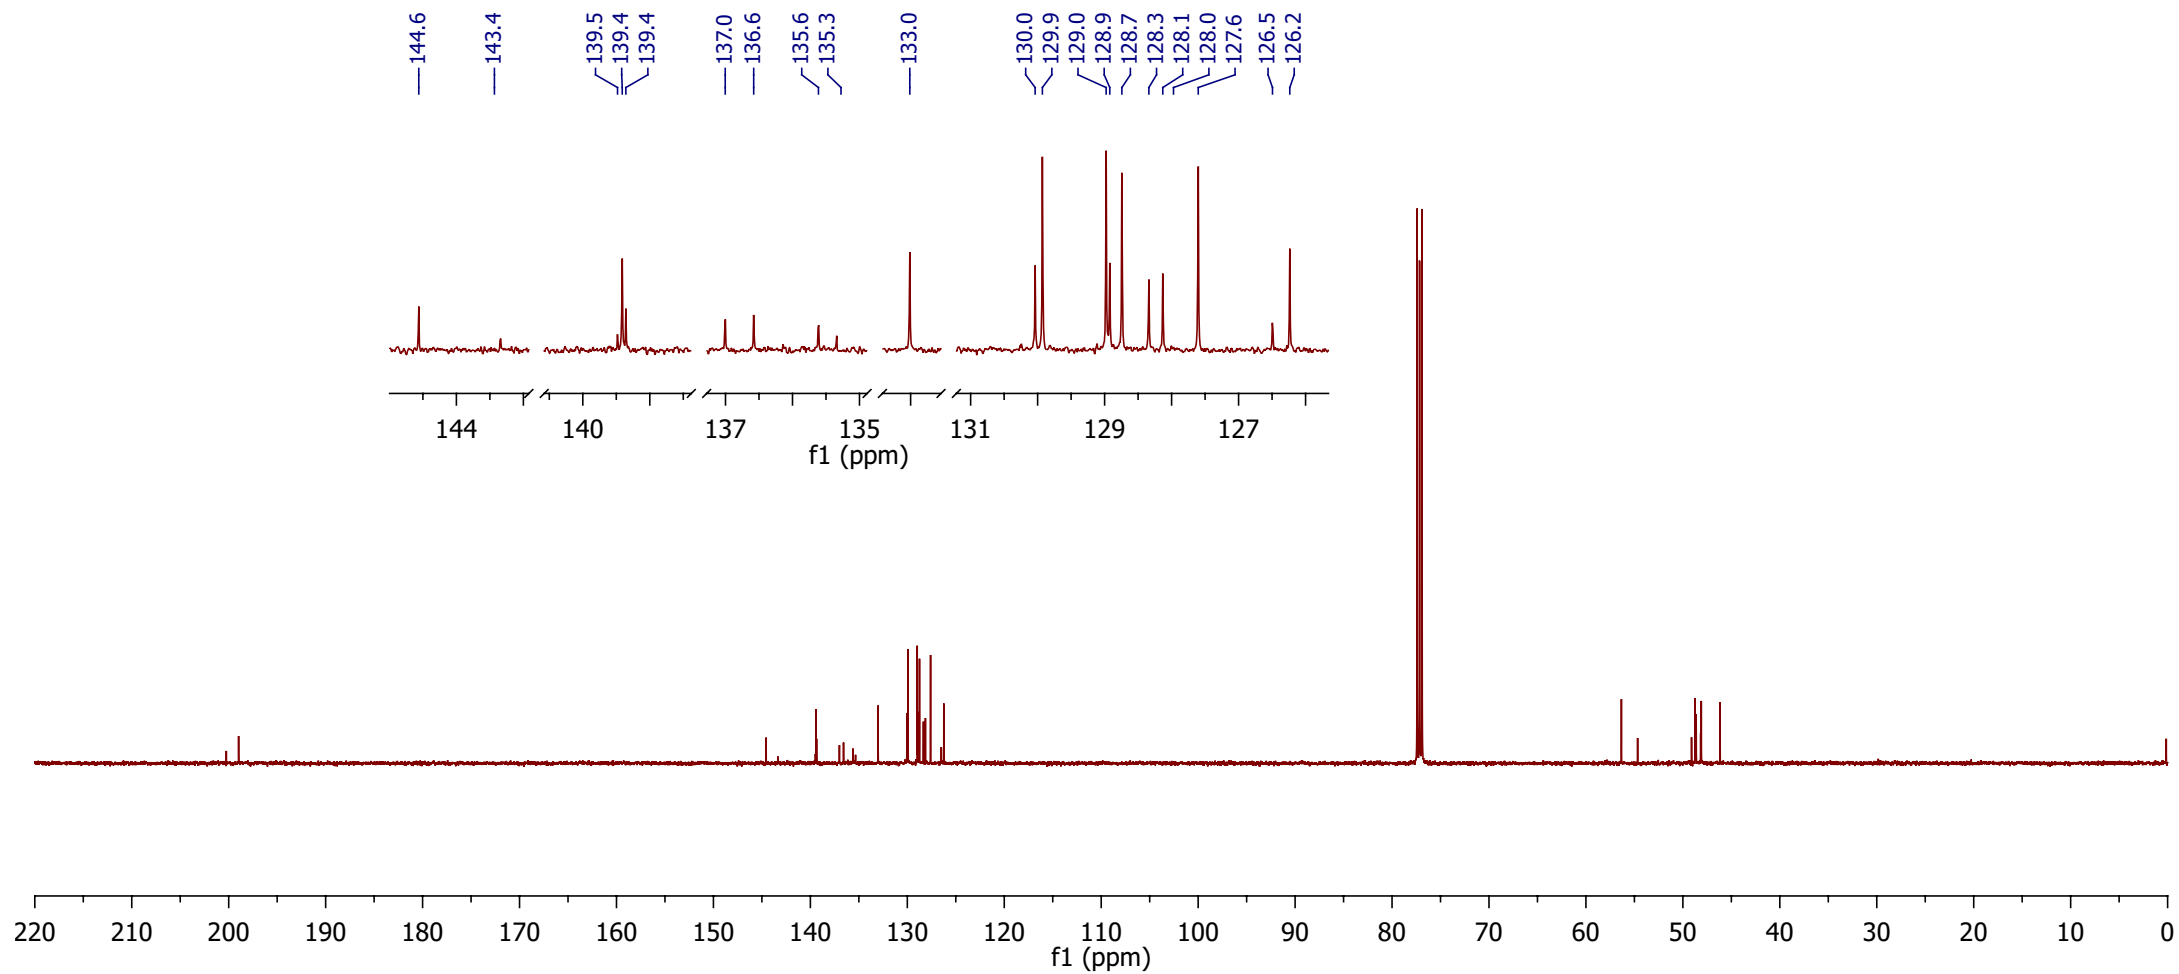

DA SUBSTRATES  
DMSO-d<sub>6</sub>  
1H NMR Spectrum  
Scan CDCl<sub>3</sub> (DMSO-d<sub>6</sub>)  
7.794  
7.790  
7.780  
7.776  
7.776  
7.724  
7.706  
7.578  
7.574  
7.565  
7.561  
7.521  
7.517  
7.507  
7.503  
7.314  
7.298  
7.289  
7.285  
7.275  
7.272  
7.267  
7.260  
7.245  
7.242  
7.230  
7.212  
7.200  
7.198  
7.185  
7.154  
7.151  
7.137  
6.472  
6.465  
6.461  
6.454  
5.882  
5.876  
5.871  
5.865  
3.851  
3.845  
3.841  
3.835  
3.814  
3.810  
3.803  
3.438  
3.435  
3.428  
3.426  
3.361  
3.358  
3.350  
3.347  
3.311  
3.165  
3.129  
3.115  
3.112  
2.036  
2.019  
1.886  
1.869  
1.666  
1.663  
1.649  
1.646

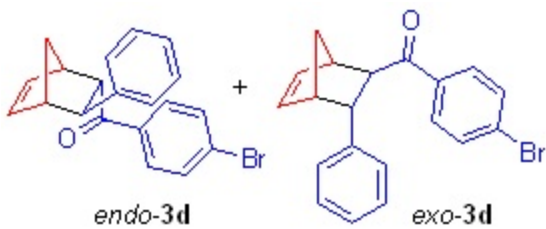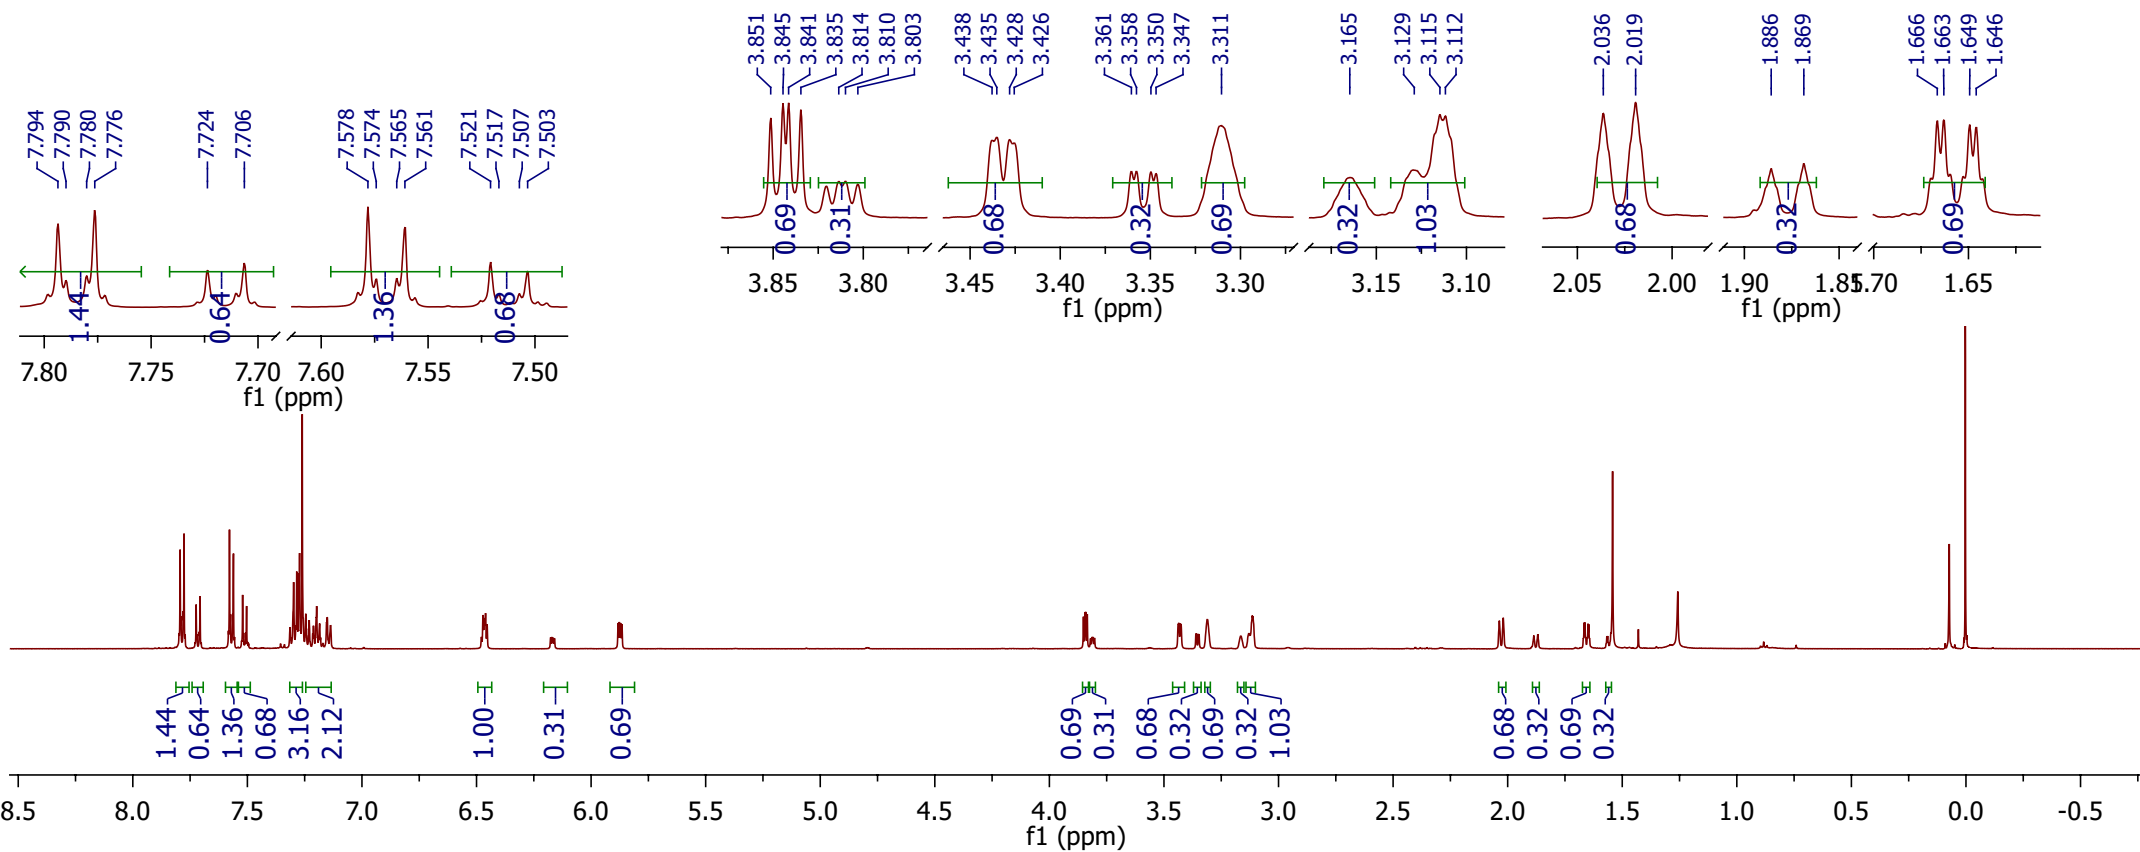

DA SUBSTRATES asymm Nmr  
DT-277  
C13CPD CDCl3 {D:\Spectra} nmr 3

144.5  
143.3  
139.4  
137.0  
136.6  
136.0  
135.8  
133.0  
132.0  
131.9  
130.2  
130.1  
128.7  
128.4  
128.2  
128.2  
128.1  
128.1  
127.6  
126.5  
126.2

77.4  
77.2  
76.9  
56.3  
54.7  
49.1  
48.7  
48.7  
48.6  
48.2  
48.2  
48.1  
46.2

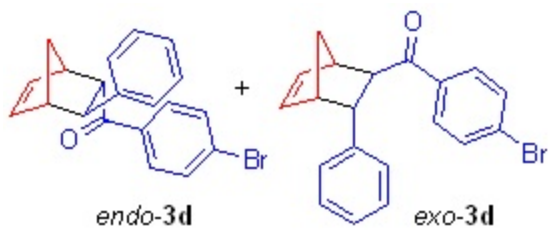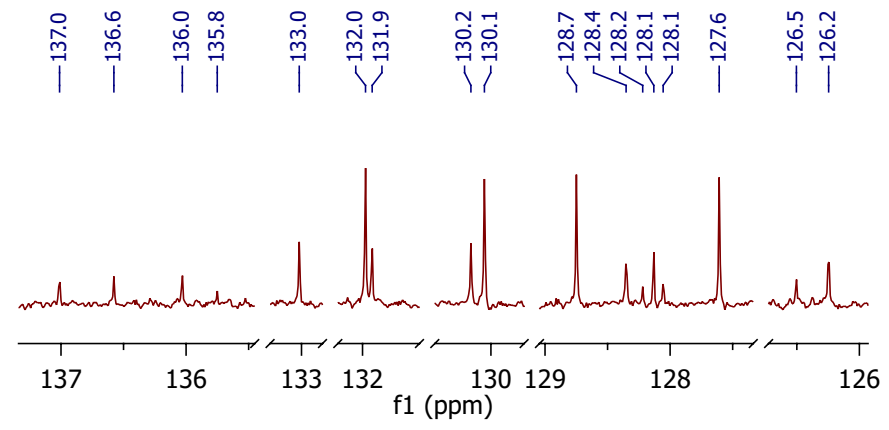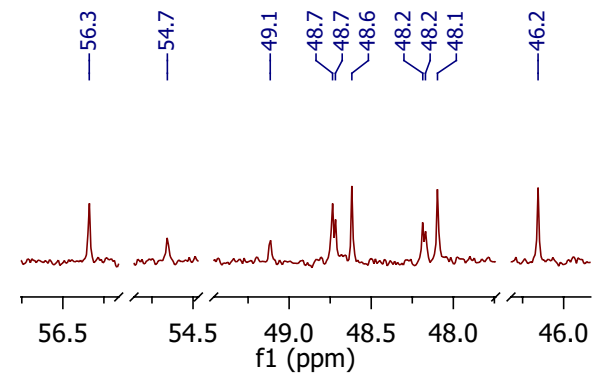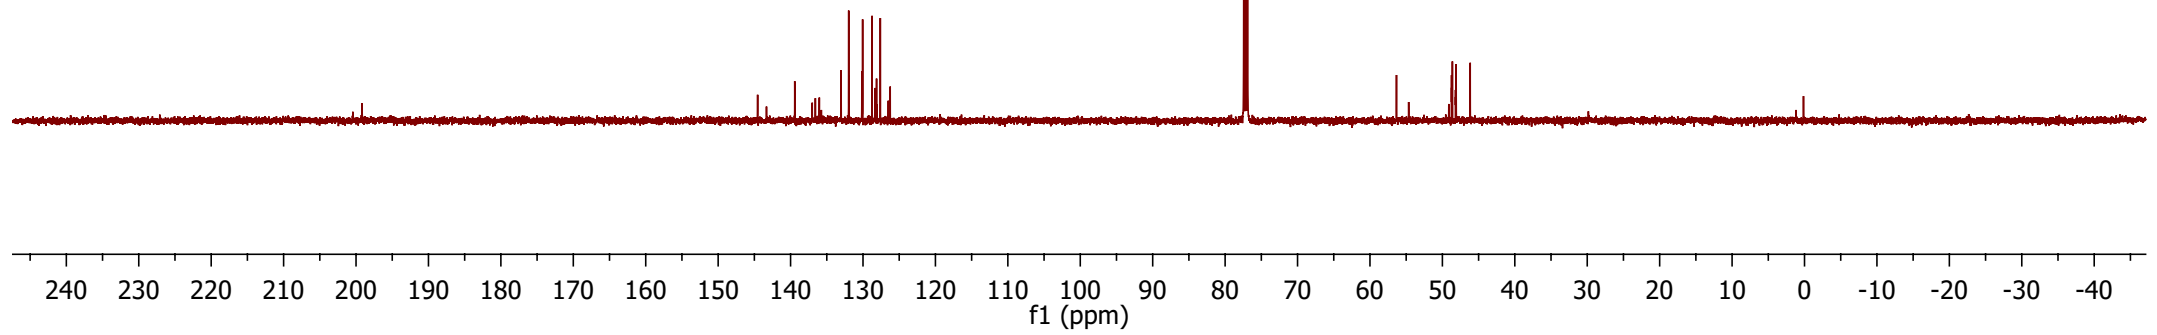

DA SUBSTRATES asymm Nmr  
 1H scan CDCl3 (D:\Spectra\hmr1  
 7.925  
 7.922  
 7.875  
 7.871  
 7.866  
 7.855  
 7.288  
 7.285  
 7.274  
 7.257  
 7.232  
 7.218  
 7.165  
 7.162  
 7.151  
 7.148  
 6.916  
 6.912  
 6.902  
 6.898  
 6.869  
 6.865  
 6.855  
 6.851  
 6.474  
 6.468  
 6.463  
 6.457  
 6.450  
 6.170  
 6.165  
 6.159  
 6.154  
 5.889  
 5.883  
 3.890  
 3.883  
 3.879  
 3.870  
 3.858  
 3.838  
 3.472  
 3.469  
 3.462  
 3.459  
 3.462  
 3.459  
 3.390  
 3.387  
 3.379  
 3.376  
 3.327  
 3.164  
 3.111  
 2.029  
 2.012  
 1.920  
 1.903  
 1.650  
 1.647  
 1.633  
 1.630  
 1.920  
 1.903  
 1.650  
 1.647  
 1.633  
 1.630  
 1.542  
 1.539  
 1.525  
 1.521

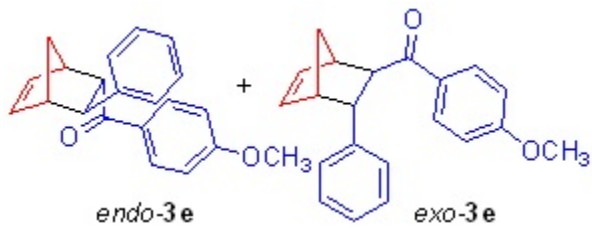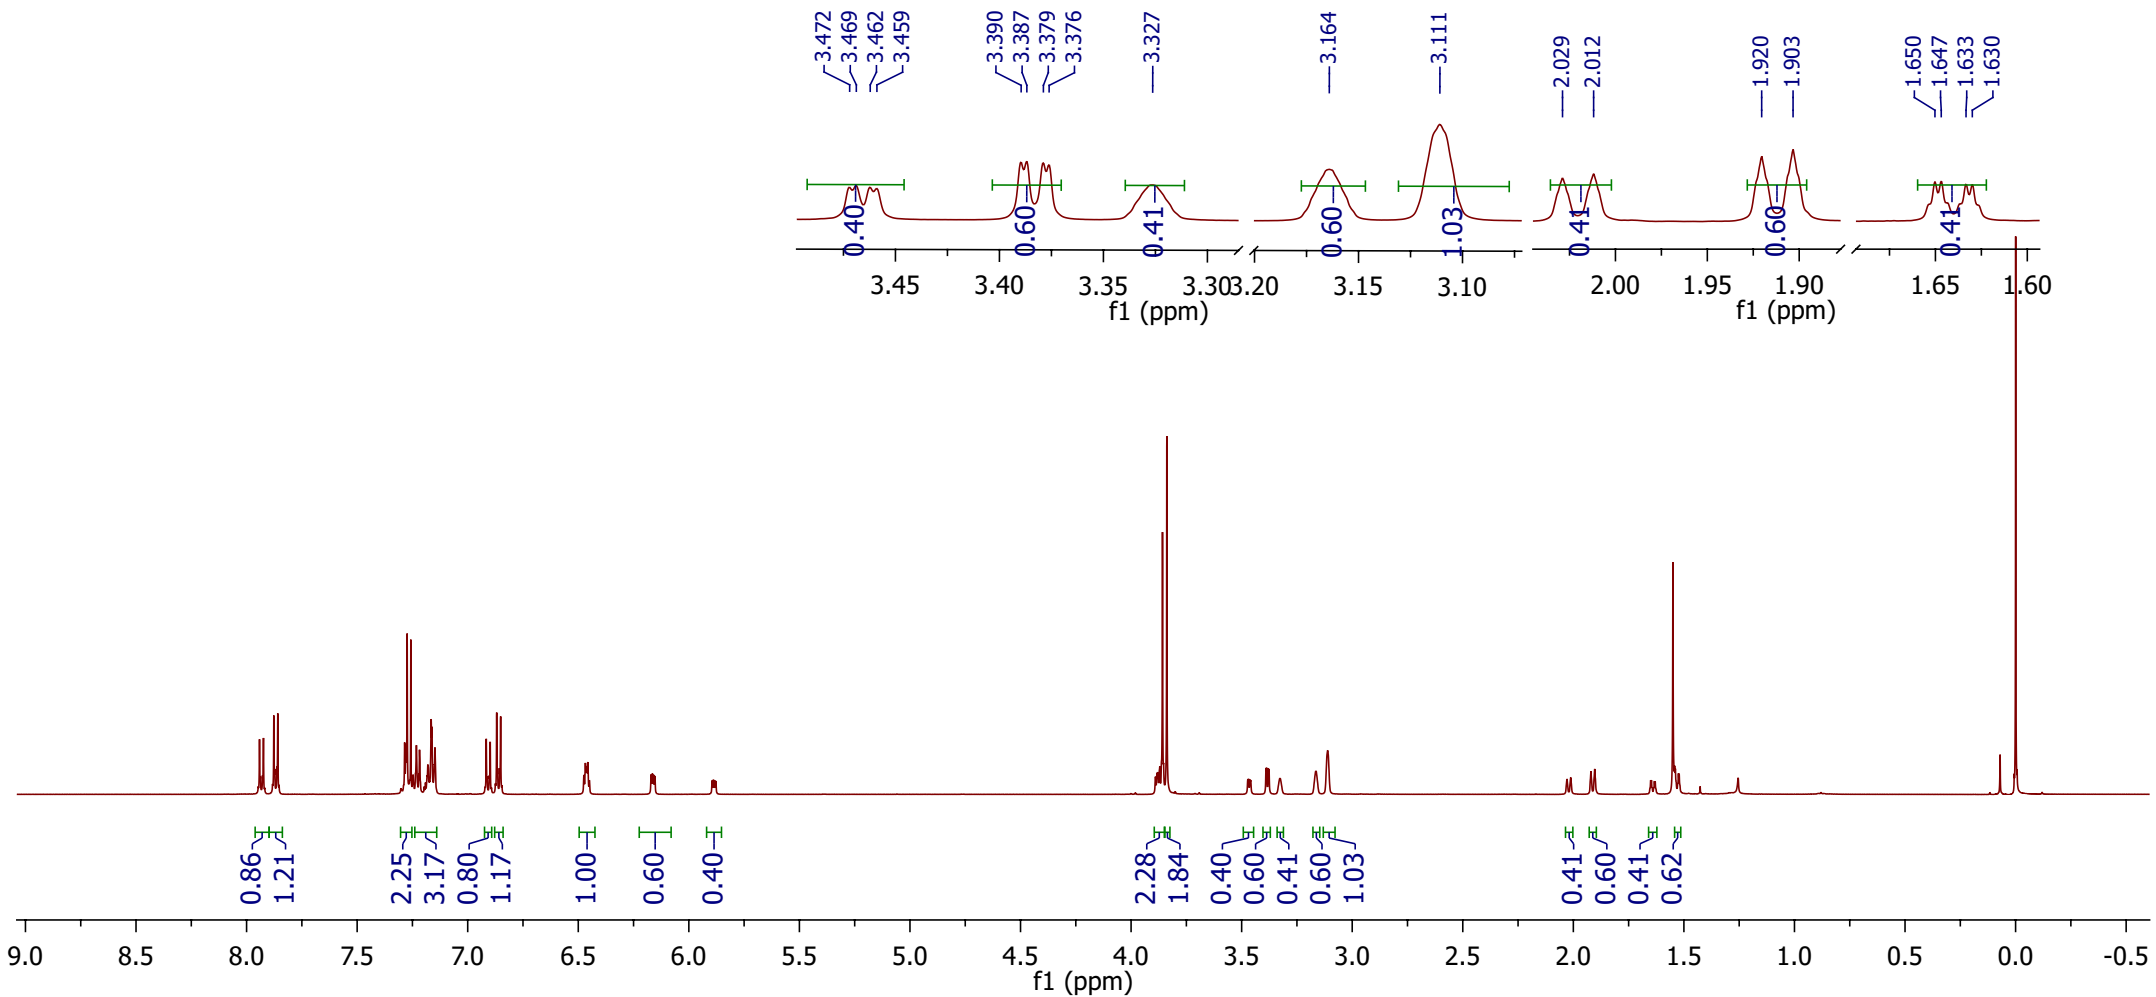

DA SUBSTRATES asymm Nmrs  
DT-275  
C13CPD, CDCl3 {D:\Spectra} nmr 1

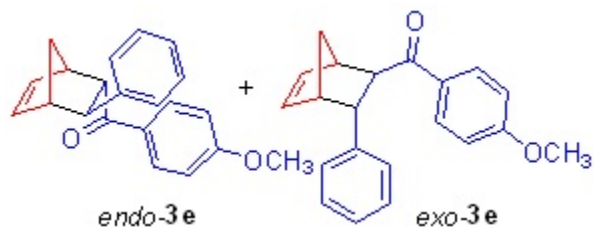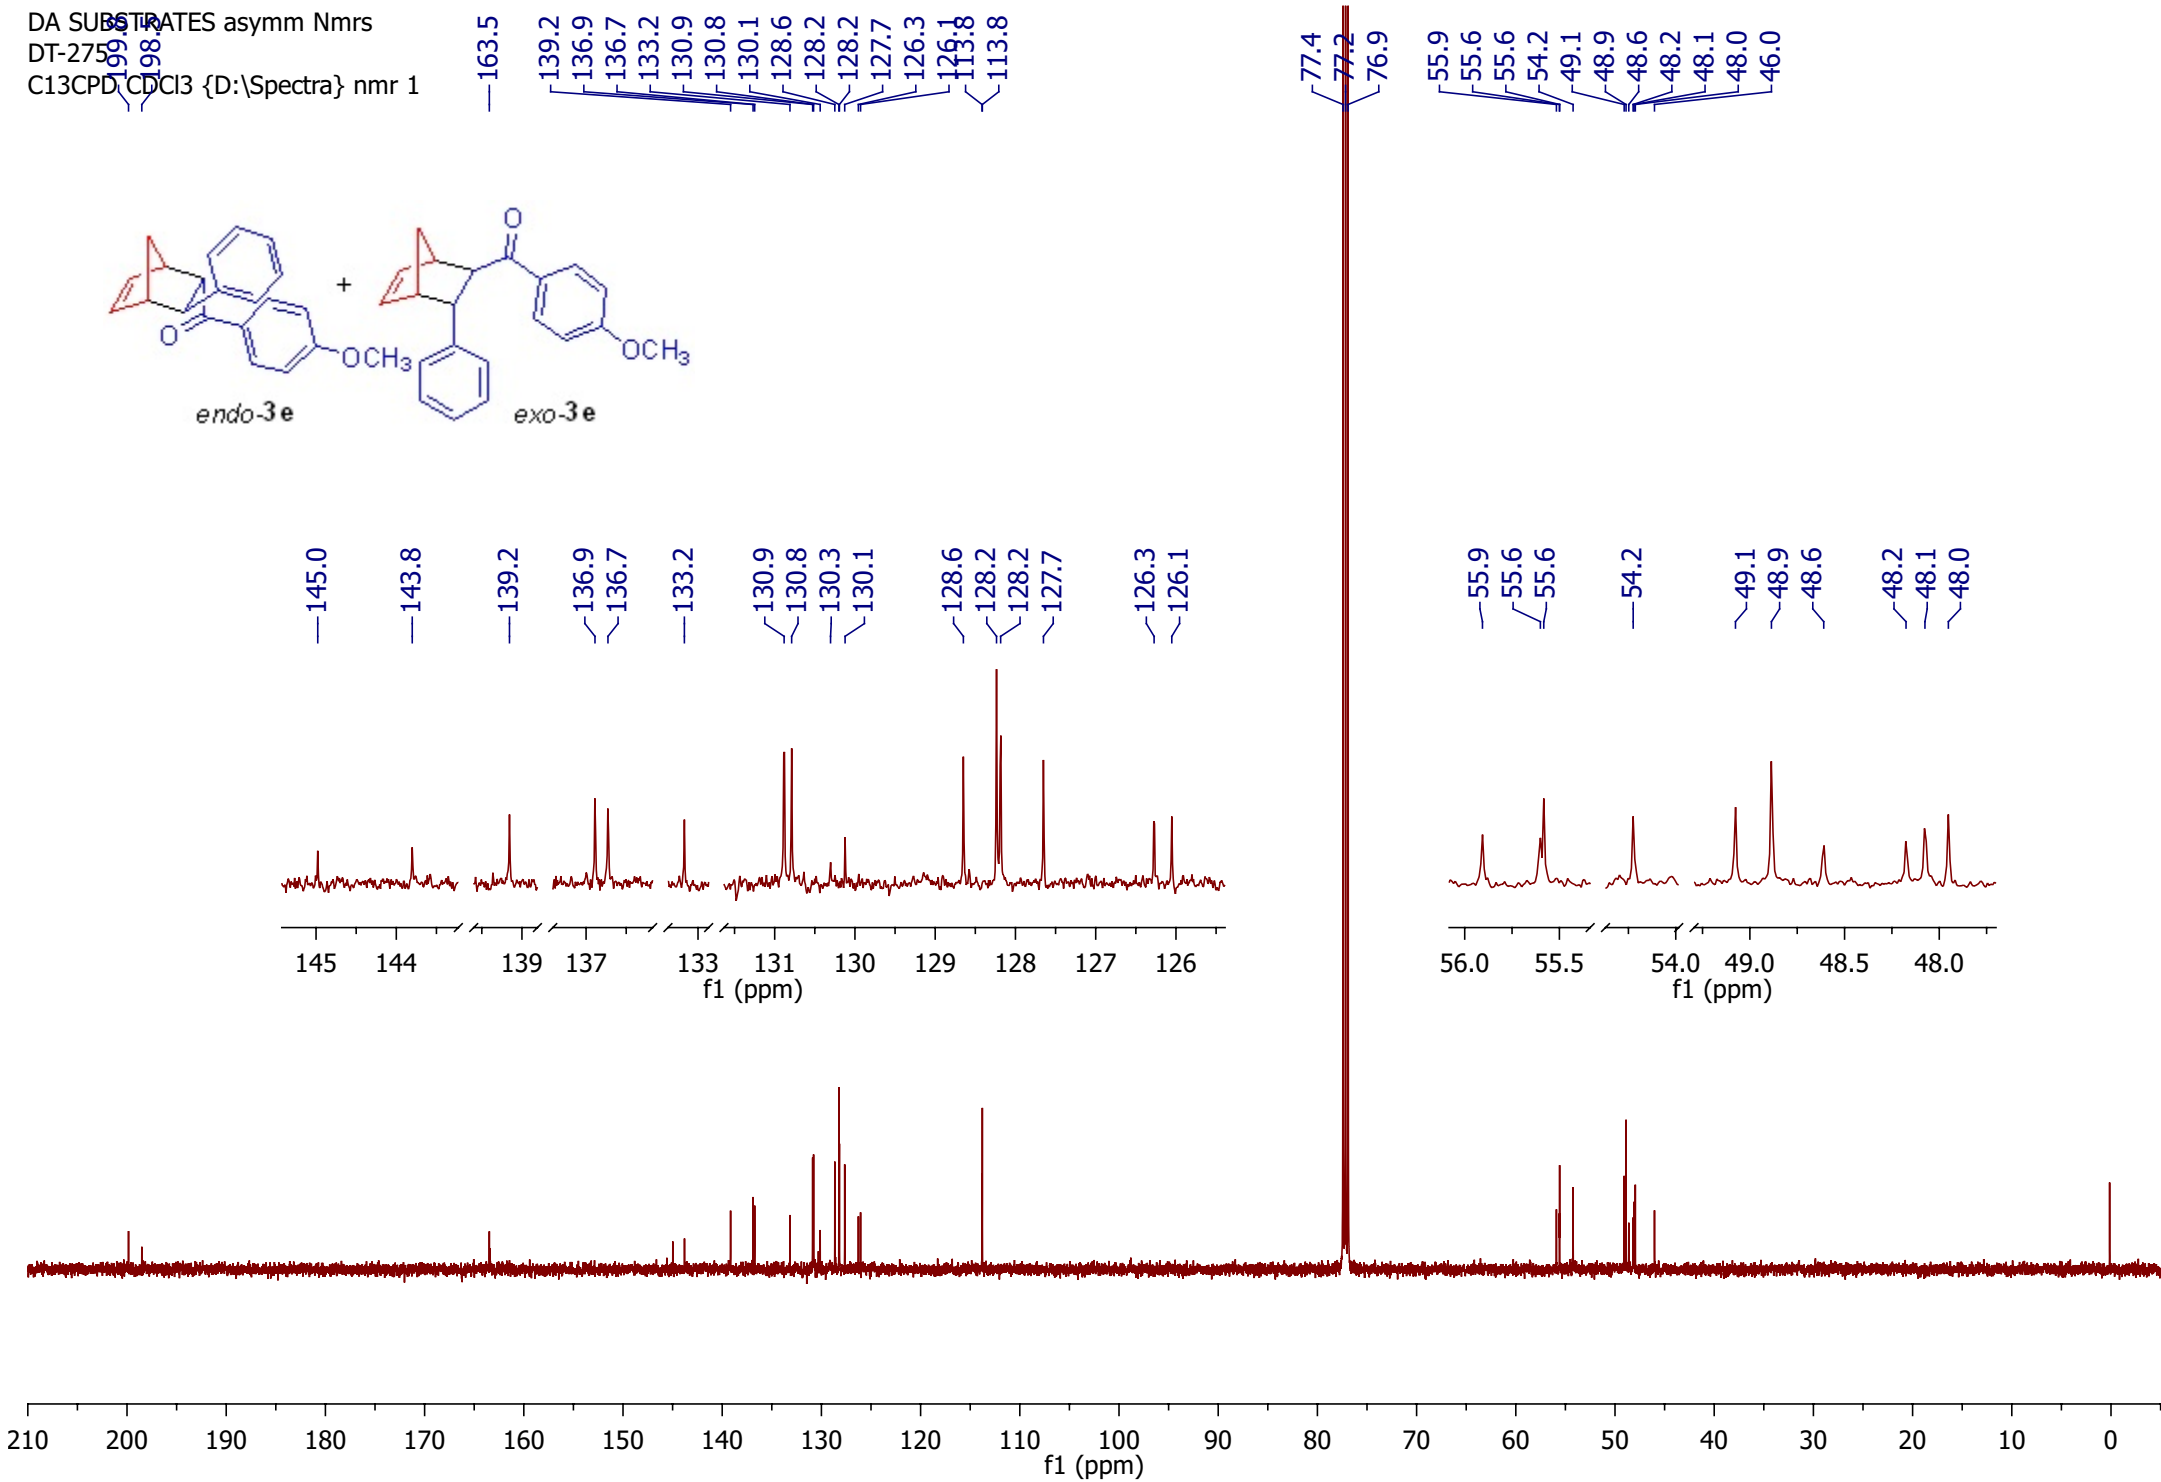

DA SUBSTRATES asynon Nmr1  
 1H scan CDCl3 (D:\Spectra\hmr1  
 7.934 7.932 7.917 7.915 7.868  
 7.545 7.530 7.523 7.456 7.440 7.425 7.416 7.399 7.260 7.235 7.224 7.221 7.218 7.207 7.104 7.093 6.986 6.972 6.968 6.964 6.951 6.932 6.915 6.898 6.462 6.456 6.451 6.445 5.871 5.865 5.860 5.854 3.842 3.835 3.832 3.825 3.447 3.438 3.345 3.138 3.134 3.131 3.076 3.073 1.999 1.982 1.887 1.869

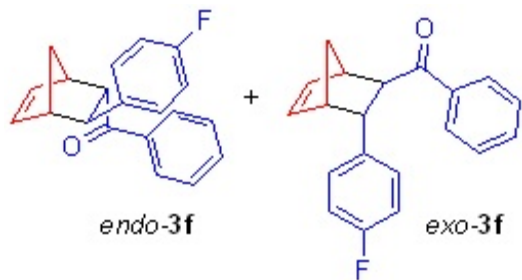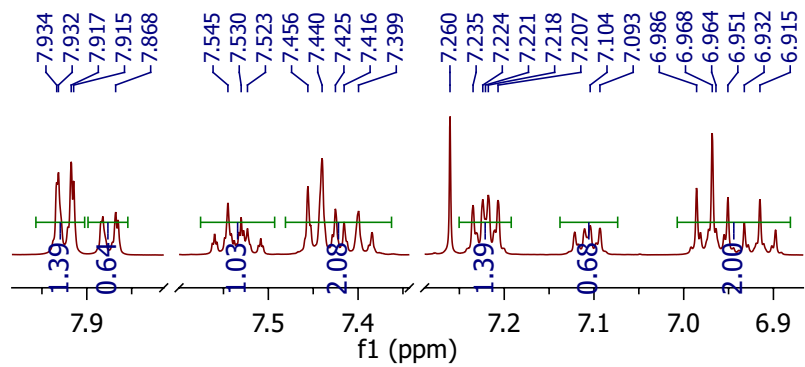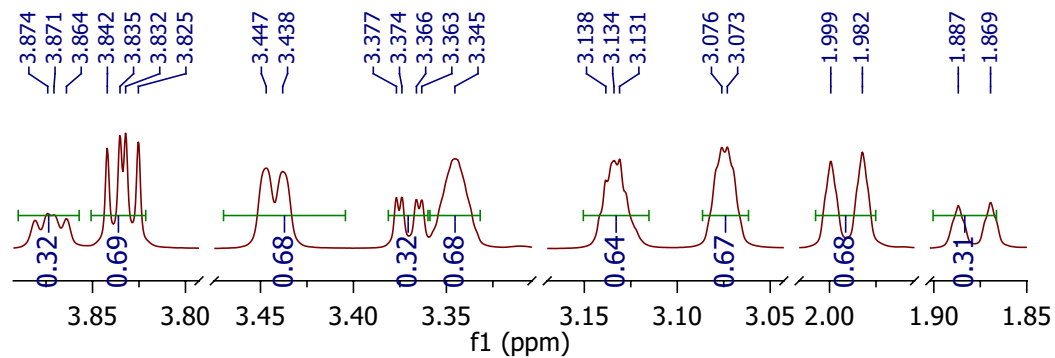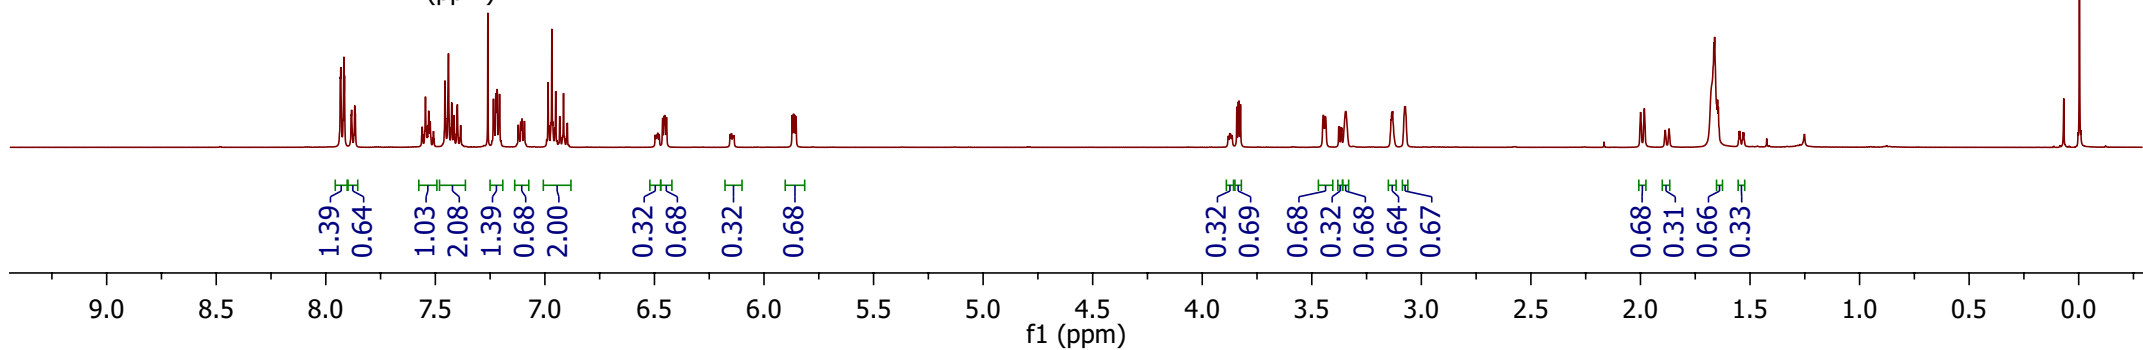

DA SUBSTRATES asymm Nmrs  
DT-278  
C13CPD CDCl3 {D:\Spectra} nmr 1

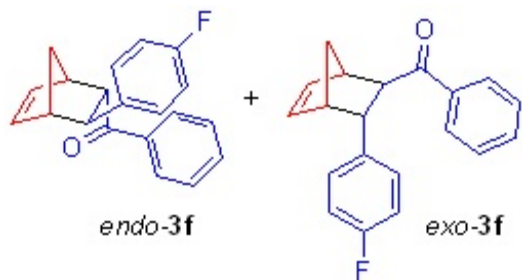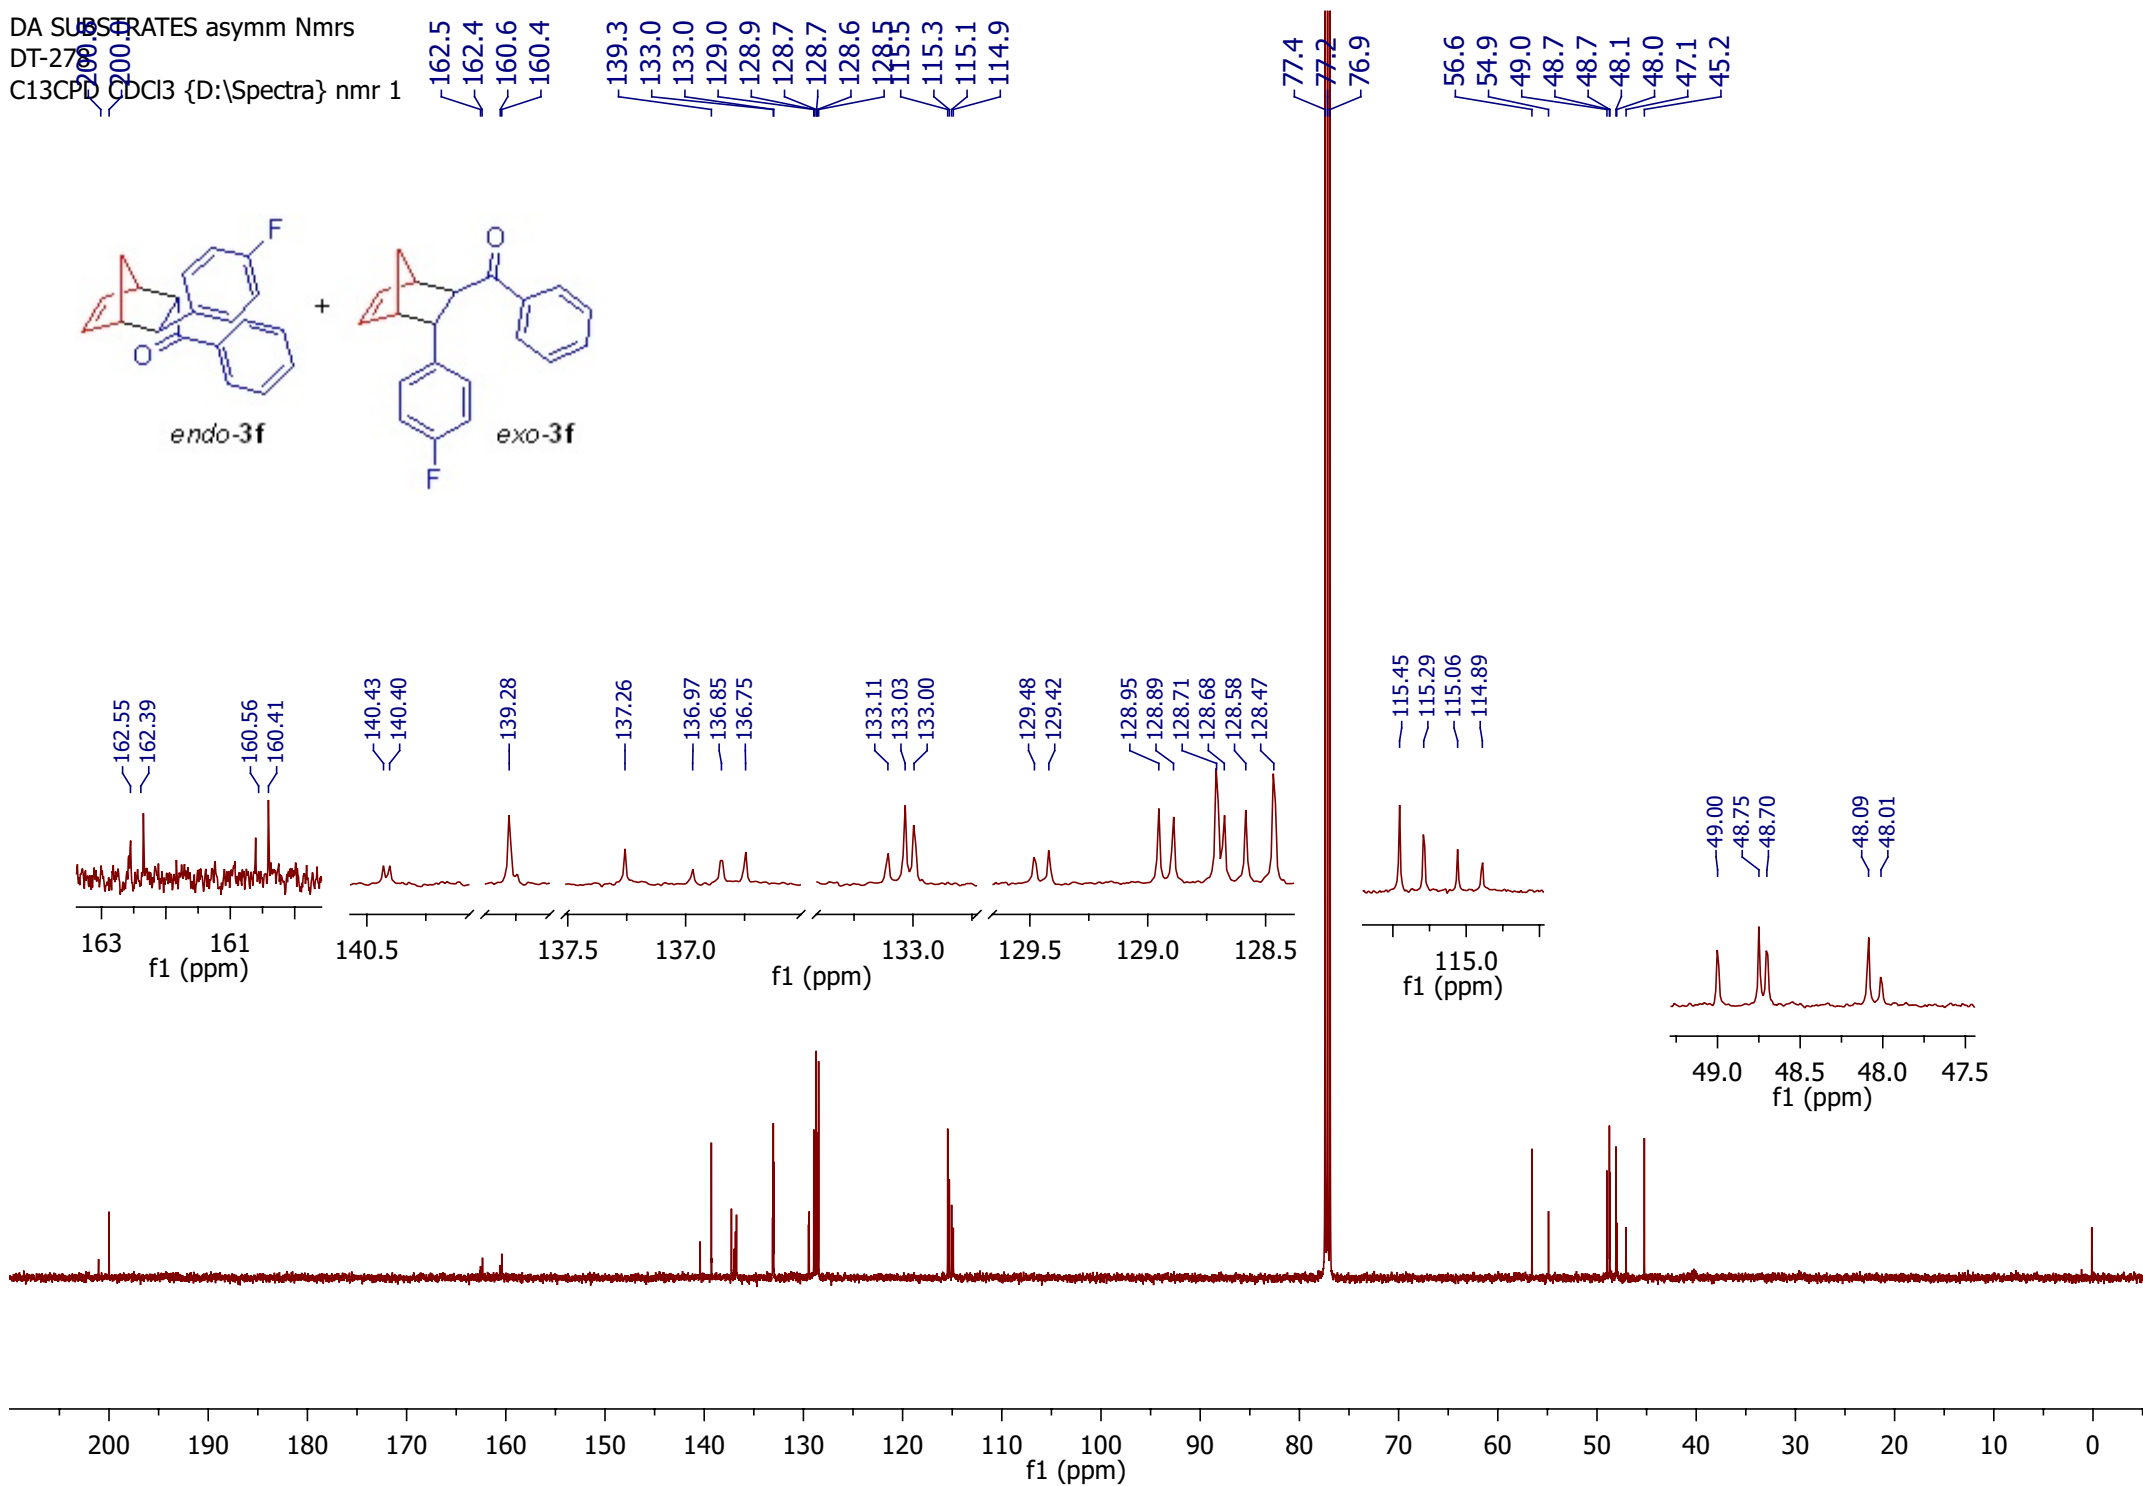

DA SUBSTRATES asymmetric Nmr  
 D8  
 1H Scan CDCl3 3D Spectra  
 7.911  
 7.899  
 7.911  
 7.891  
 7.891  
 7.877  
 7.877  
 7.545  
 7.545  
 7.530  
 7.528  
 7.457  
 7.454  
 7.441  
 7.426  
 7.422  
 7.407  
 7.406  
 7.391  
 7.256  
 7.252  
 7.243  
 7.239  
 7.234  
 7.208  
 7.204  
 7.200  
 7.190  
 7.187  
 7.090  
 7.073  
 6.459  
 6.453  
 6.448  
 6.442  
 5.869  
 5.864  
 5.858  
 5.853  
 3.839  
 3.832  
 3.829  
 3.822  
 3.454  
 3.452  
 3.445  
 3.442  
 3.381  
 3.379  
 3.371  
 3.368  
 3.349  
 3.142  
 3.139  
 3.136  
 3.133  
 3.082  
 3.079  
 1.978  
 1.961  
 1.887  
 1.870  
 1.664  
 1.661  
 1.647  
 1.644  
 1.550  
 1.547  
 1.533  
 1.529  
 1.588

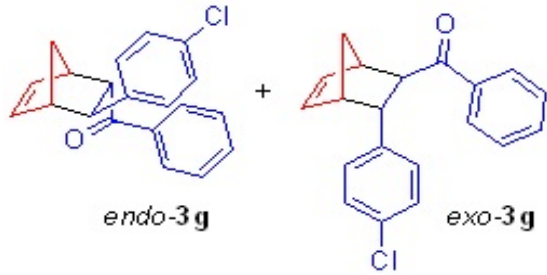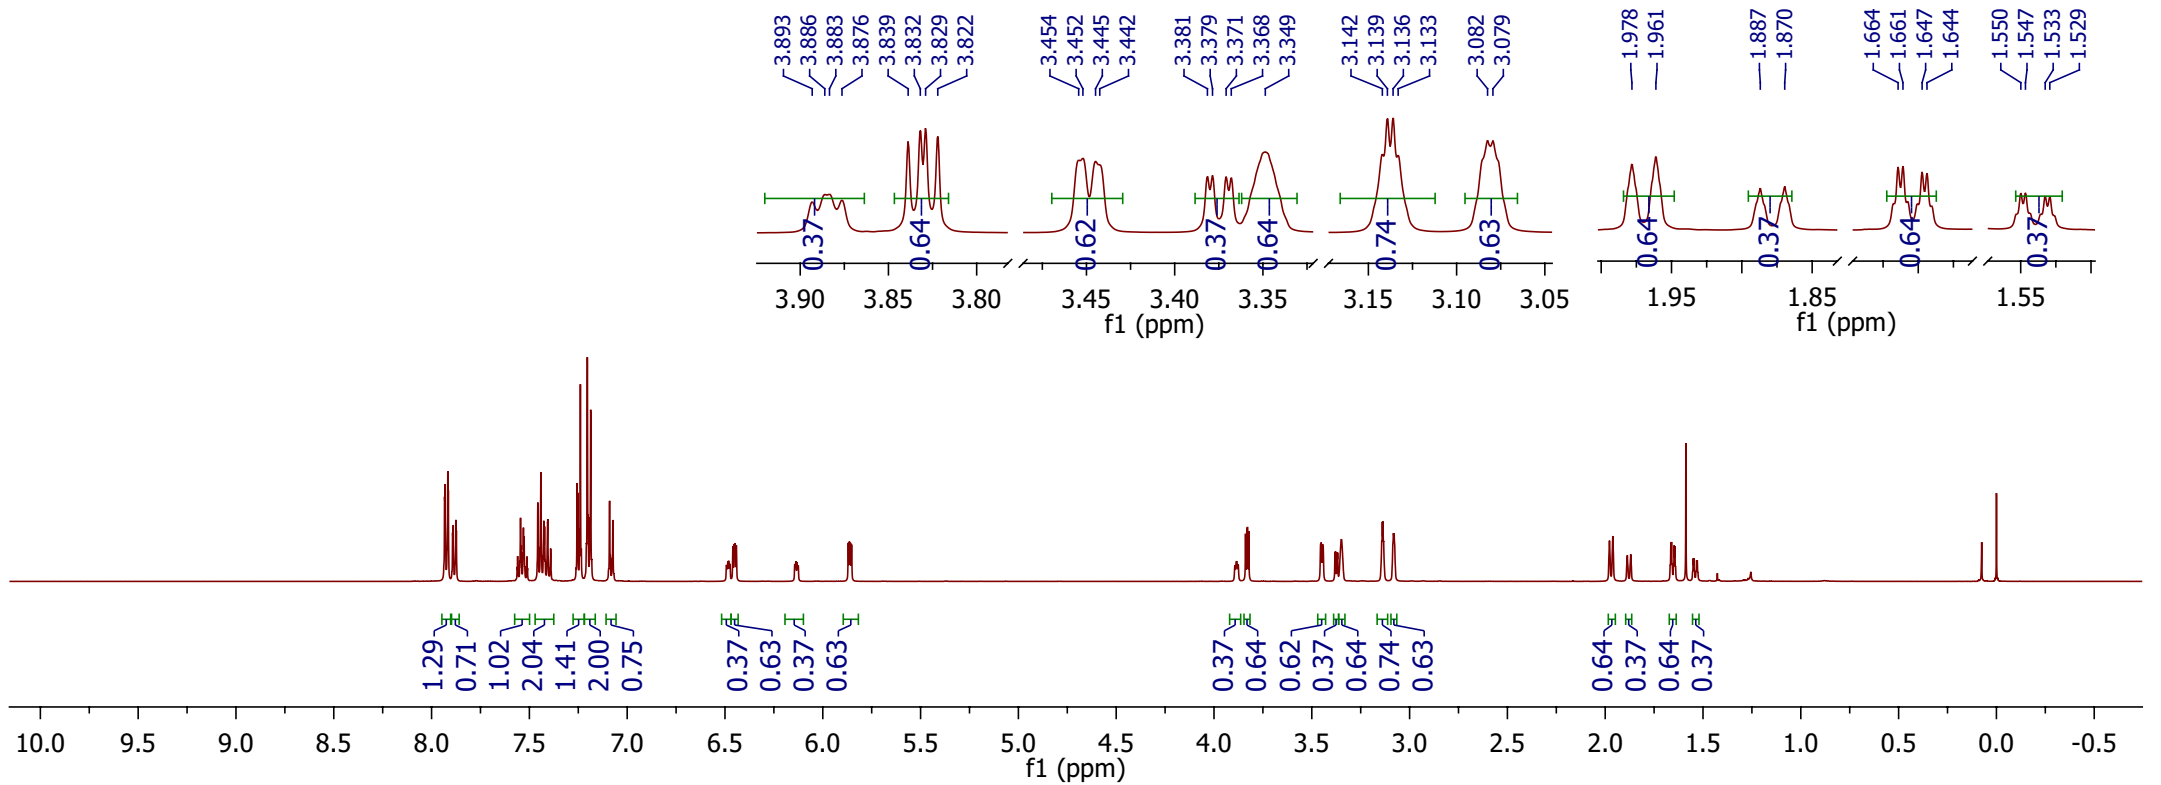

DA SUBSTRATES asymm Nmrs  
DT-279  
C13CPD CDCI3 {D:\Spectra} nmr 1

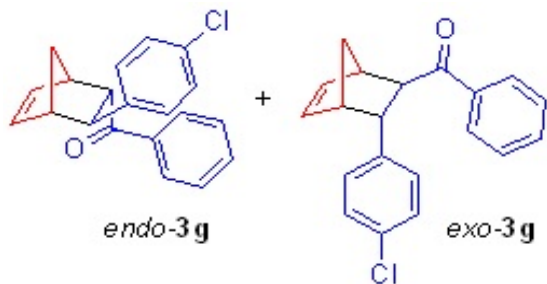

143.3  
142.1  
139.2  
137.2  
136.9  
136.7  
133.1  
133.1  
133.0  
132.1  
131.8  
129.4  
128.9  
128.7  
128.7  
128.6  
128.5  
128.3

77.4  
77.2  
76.9

56.5  
54.7  
49.0  
48.9  
48.8  
48.5  
48.1  
48.0  
47.2  
45.3

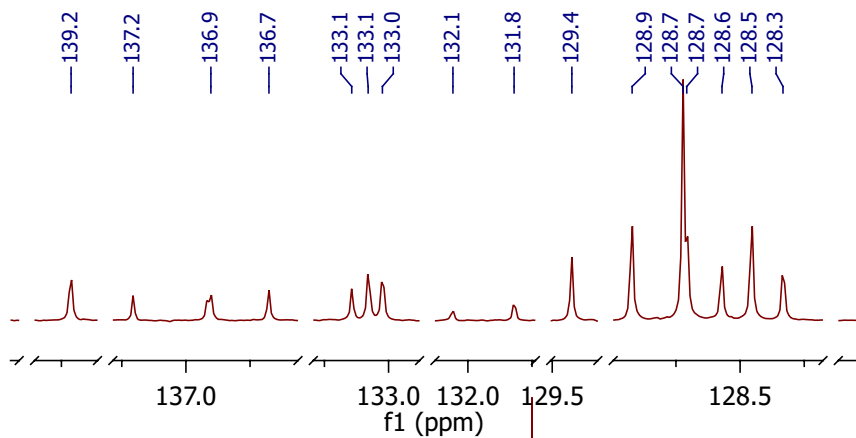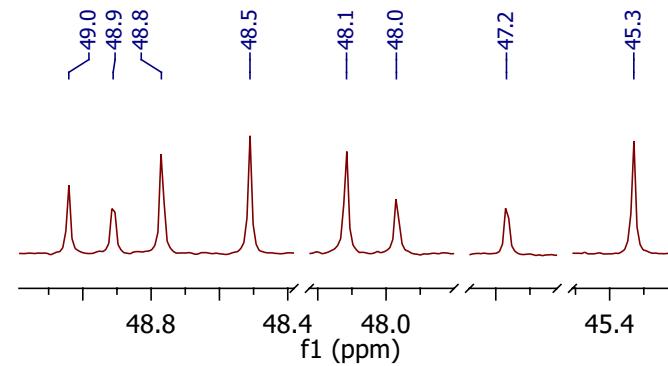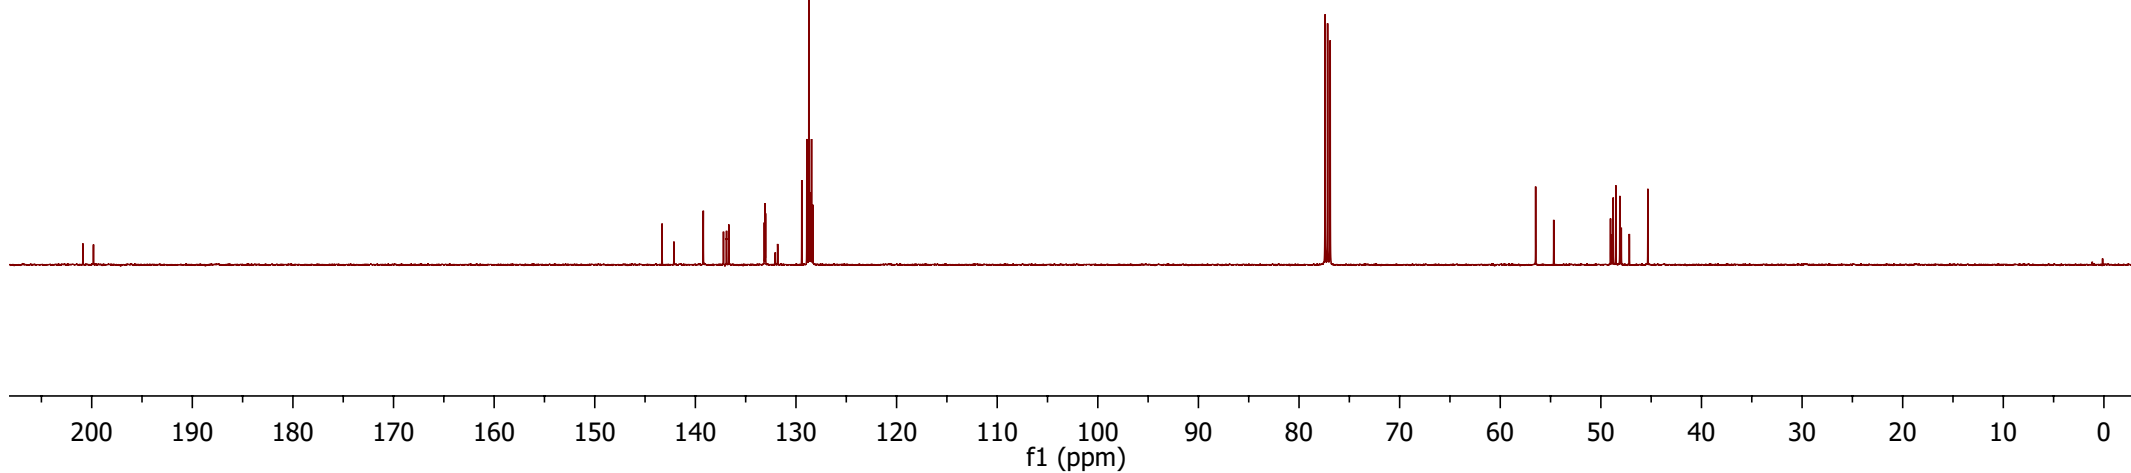

DA SUBSTRATE  
 D81  
 1H scan CDCl3 (D:\Spectra\hmr8  
 7.984  
 7.981  
 7.922  
 7.918  
 7.917  
 7.899  
 7.895  
 7.877  
 7.877  
 7.555  
 7.550  
 7.538  
 7.536  
 7.521  
 7.448  
 7.433  
 7.431  
 7.414  
 7.411  
 7.398  
 7.394  
 7.358  
 7.341  
 7.260  
 7.153  
 7.137  
 7.038  
 7.036  
 7.024  
 7.022  
 6.463  
 6.456  
 6.452  
 6.445  
 5.871  
 5.865  
 5.860  
 5.854  
 3.838  
 3.831  
 3.828  
 3.821  
 3.439  
 3.431  
 3.380  
 3.377  
 3.369  
 3.366  
 3.351  
 3.143  
 3.140  
 3.136  
 3.087  
 3.084  
 1.976  
 1.959  
 1.888  
 1.870  
 1.668  
 1.664  
 1.651  
 1.647  
 1.959  
 1.870  
 1.668  
 1.664  
 1.651  
 1.647  
 1.536  
 1.532

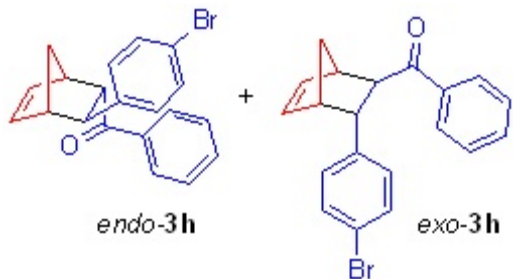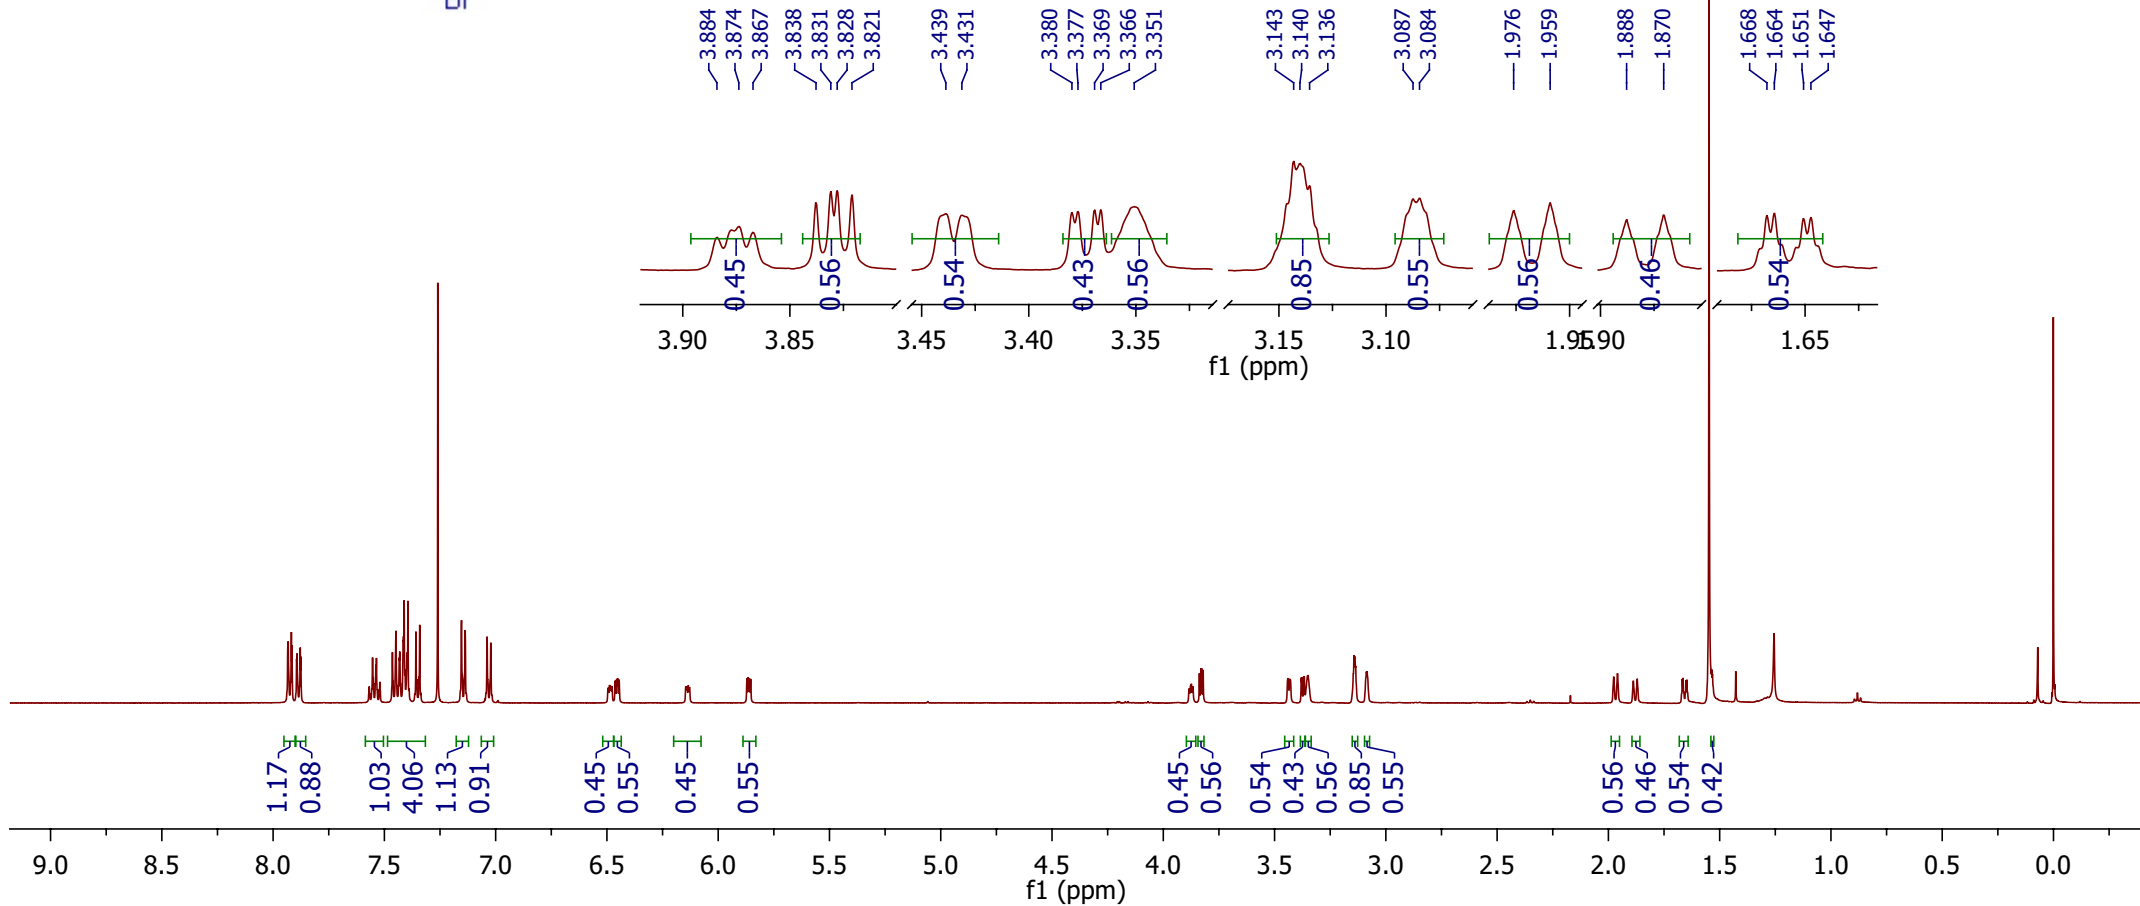

DA SUBSTRATES asymm Nmrs  
DT-28  
C13CPD CDCl3 {D:\Spectra} nmr 8

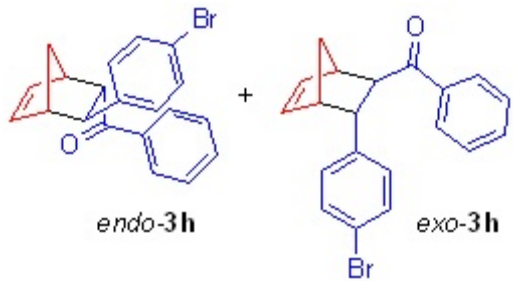

139.2  
137.2  
136.9  
136.7  
133.2  
133.1  
133.1  
131.7  
131.3  
129.8  
129.4  
128.7  
128.6  
128.5

77.4  
77.2  
76.9

56.5  
54.7  
49.1  
48.9  
48.8  
48.5  
48.1  
48.0  
47.2  
45.4

139.2  
137.2  
136.9  
136.7  
133.2  
133.1  
133.1  
131.7  
131.3  
129.8  
129.4  
128.7  
128.6  
128.5

49.1  
48.9  
48.8  
48.5  
48.1  
48.0  
47.2

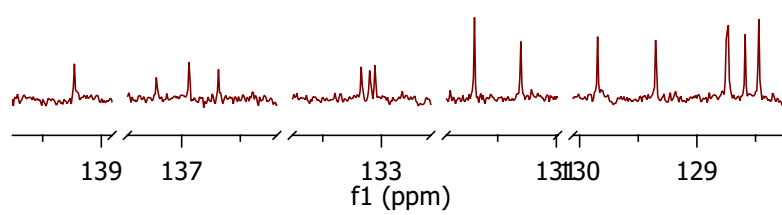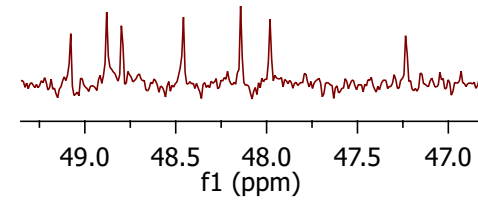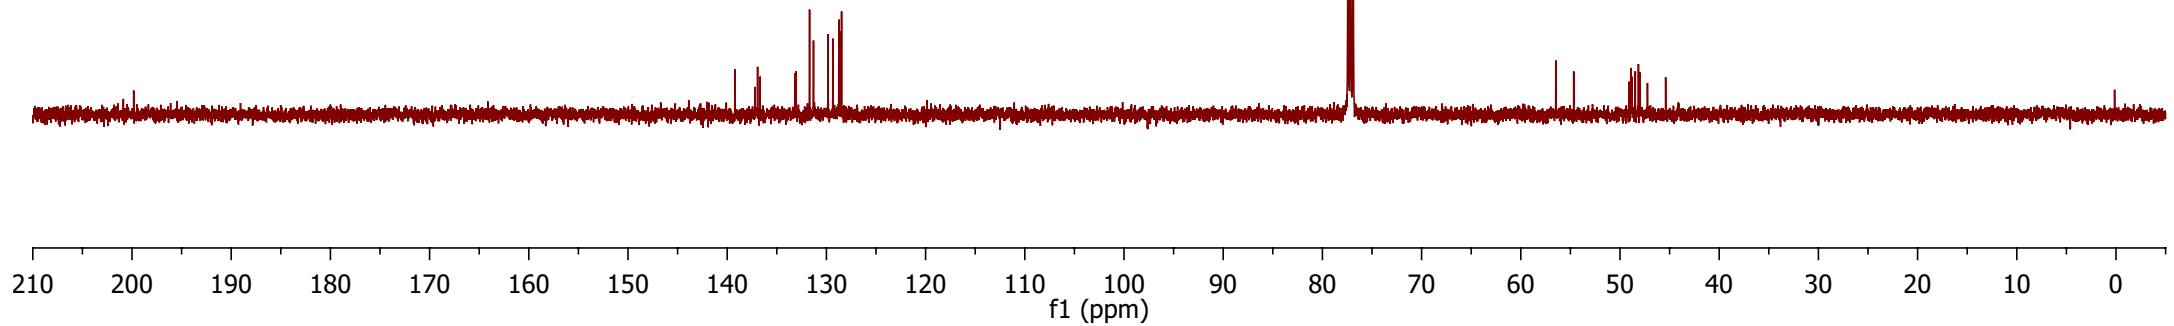



DA SUBSTRATES asymm Nmrs  
DT-288  
C13CPD CDCl3 {D:\Spectra} nmr 13

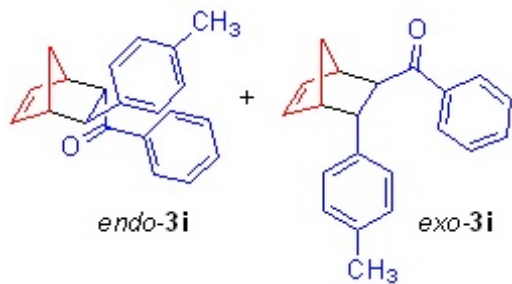

141.7  
140.6  
139.3  
137.4  
137.1  
137.0  
136.6  
135.8  
135.6  
133.0  
133.0  
132.9  
129.3  
128.9  
128.6  
128.6  
128.5  
128.0  
127.5

77.4  
77.2  
76.9

56.3  
54.7  
49.0  
48.9  
48.8  
48.7  
48.1  
47.9  
47.5  
45.6  
30.5  
29.8  
21.1  
21.1

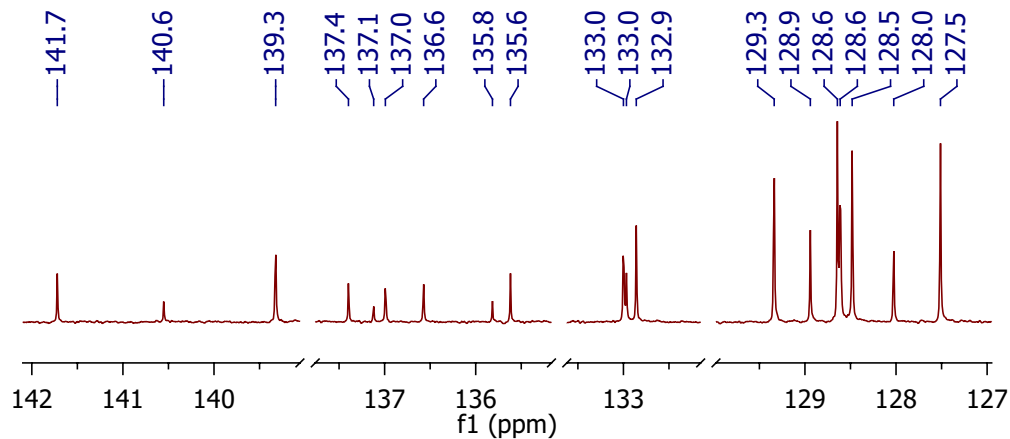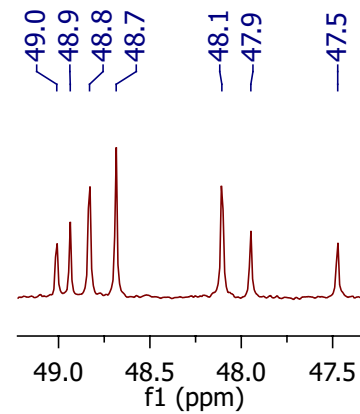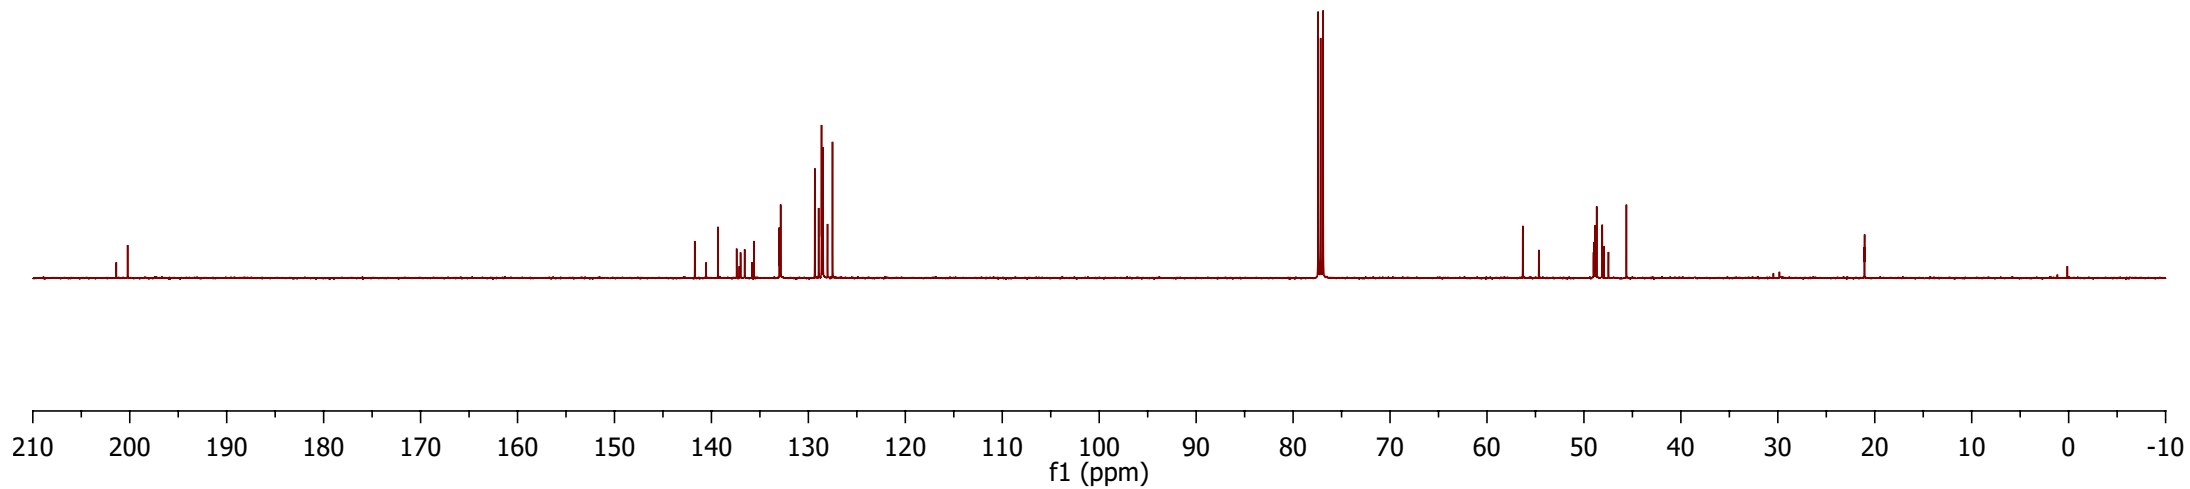

DA SUBSTRATES  
D44  
1H Scan (CDCl3) (D:\Spectra\hmr1  
8.122  
8.122  
8.122  
8.091  
8.088  
8.074  
7.955  
7.949  
7.933  
7.935  
7.932  
7.929  
7.927  
7.912  
7.910  
7.570  
7.557  
7.555  
7.479  
7.476  
7.463  
7.454  
7.451  
7.448  
7.439  
7.438  
7.436  
7.429  
7.425  
7.415  
7.412  
7.318  
7.301  
7.260  
6.484  
6.477  
6.473  
6.466  
5.882  
5.877  
5.871  
5.865  
3.861  
3.854  
3.851  
3.844  
3.627  
3.619  
3.463  
3.460  
3.452  
3.450  
3.416  
3.180  
3.177  
3.174  
1.983  
1.966  
1.903  
1.885  
1.732  
1.729  
1.726  
1.722  
1.715  
1.712  
1.709  
1.705  
1.589  
1.586  
1.575  
1.572  
1.569

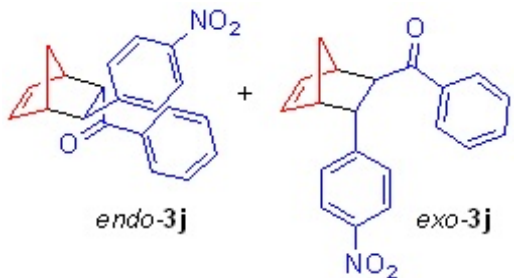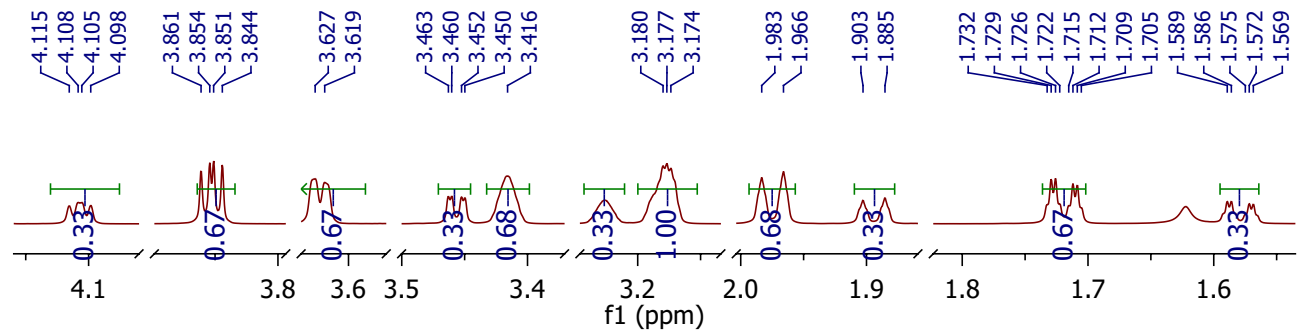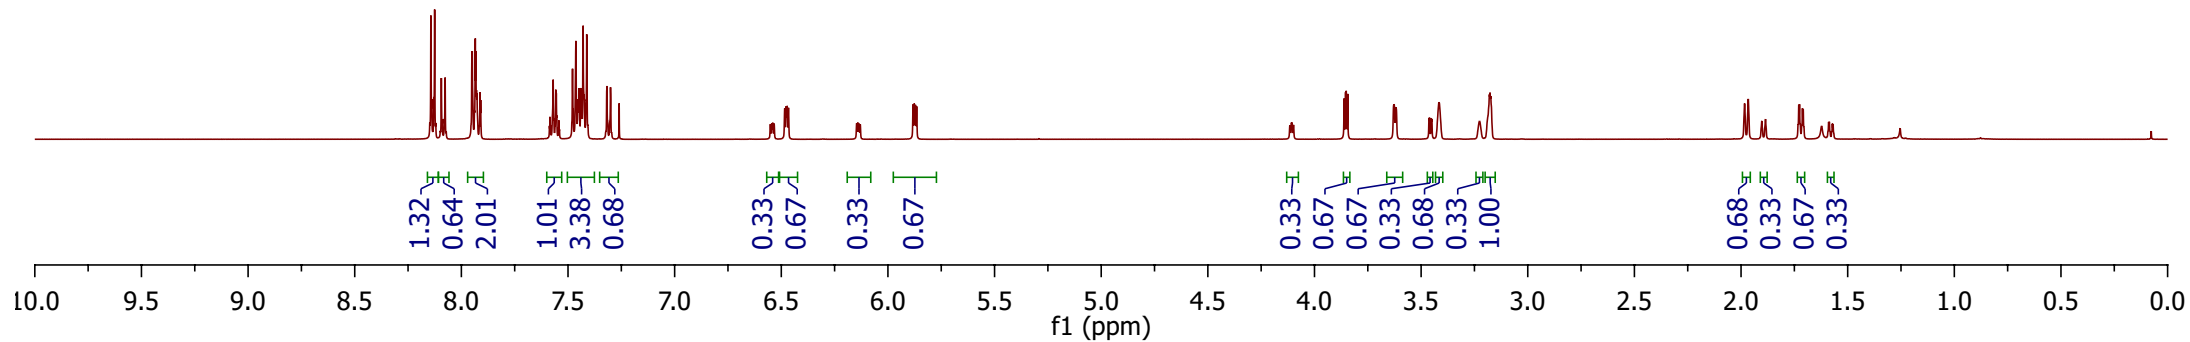

DA SUBSTRATES asymm Nmrs  
DT-288  
C13CPD CDCl3 {D:\Spectra} nmr 1

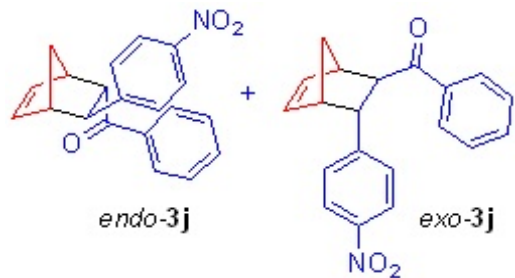

152.9  
151.7  
146.6  
146.4  
139.1  
137.3  
136.9  
136.6  
136.4  
133.4  
133.2  
133.2  
128.8  
128.8  
128.6  
128.4  
128.3  
123.9  
123.5

77.4  
77.2  
76.9

56.7  
54.7  
49.3  
49.0  
48.9  
48.2  
48.1  
47.9  
47.5  
45.8

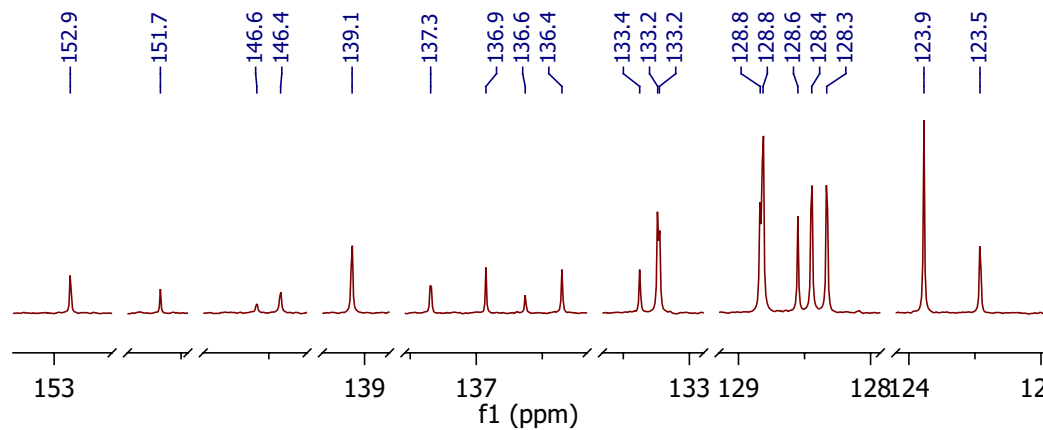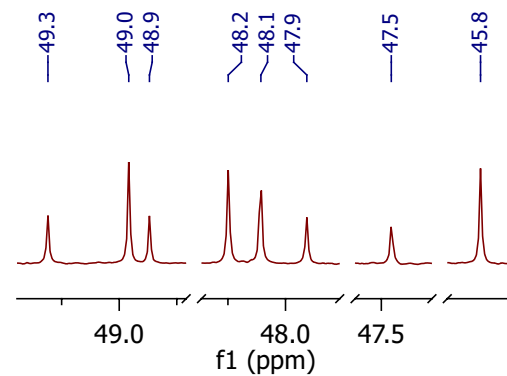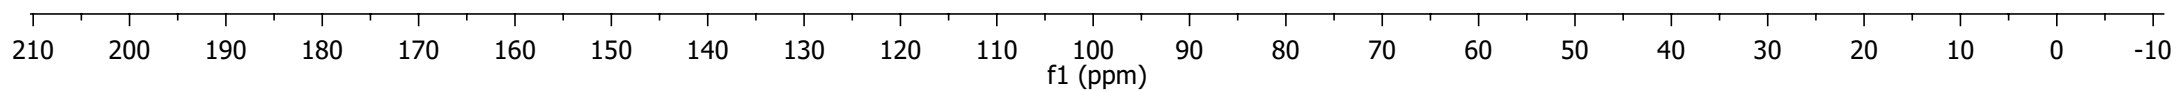

DA SUBSTRATES asymmetric NMR  
 D4 7.846  
 1H 7.836  
 7.922  
 7.922  
 7.911  
 7.911  
 7.898  
 7.896  
 7.582  
 7.565  
 7.556  
 7.556  
 7.529  
 7.513  
 7.477  
 7.461  
 7.450  
 7.446  
 7.435  
 7.434  
 7.379  
 7.363  
 7.266  
 7.261  
 7.250  
 6.529  
 6.523  
 6.518  
 6.512  
 6.138  
 6.132  
 6.126  
 6.121  
 5.874  
 5.869  
 5.863  
 4.043  
 4.040  
 4.033  
 3.839  
 3.839  
 3.832  
 3.829  
 3.822  
 3.572  
 3.564  
 3.426  
 3.424  
 3.416  
 3.413  
 3.396  
 3.201  
 3.199  
 3.172  
 3.169  
 3.147  
 3.144  
 1.960  
 1.943  
 1.890  
 1.873  
 1.709  
 1.706  
 1.692  
 1.688  
 1.577  
 1.574  
 1.560

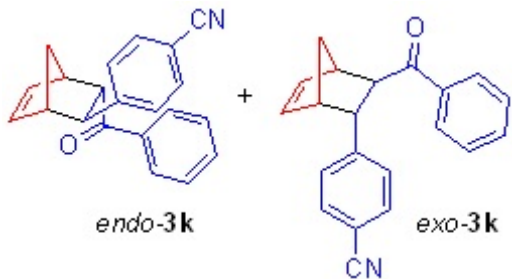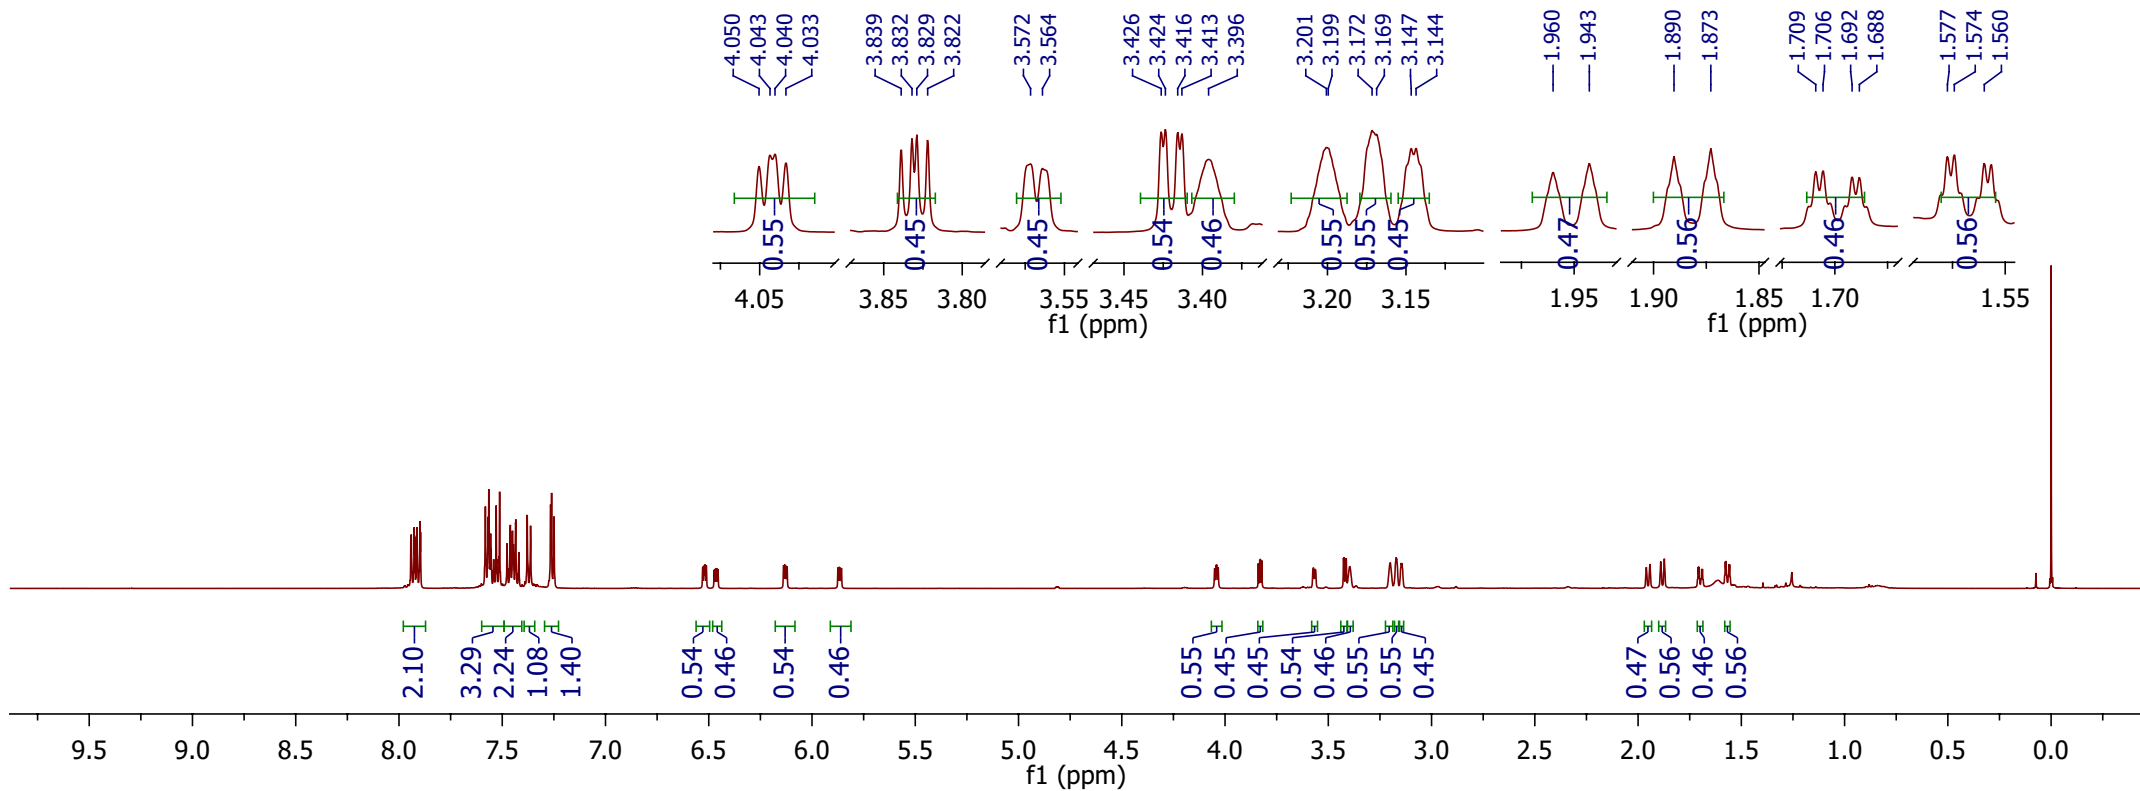

DA SUBSTRATES asymm Nmrs  
DT-286  
C13CPD CDCl3 (D:\Spectra} nmr 19

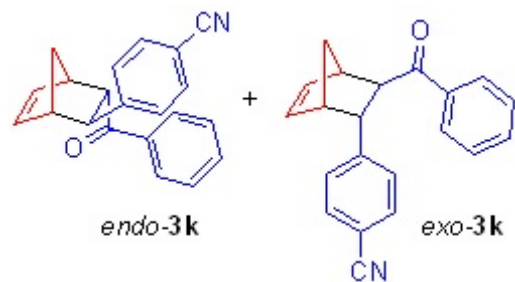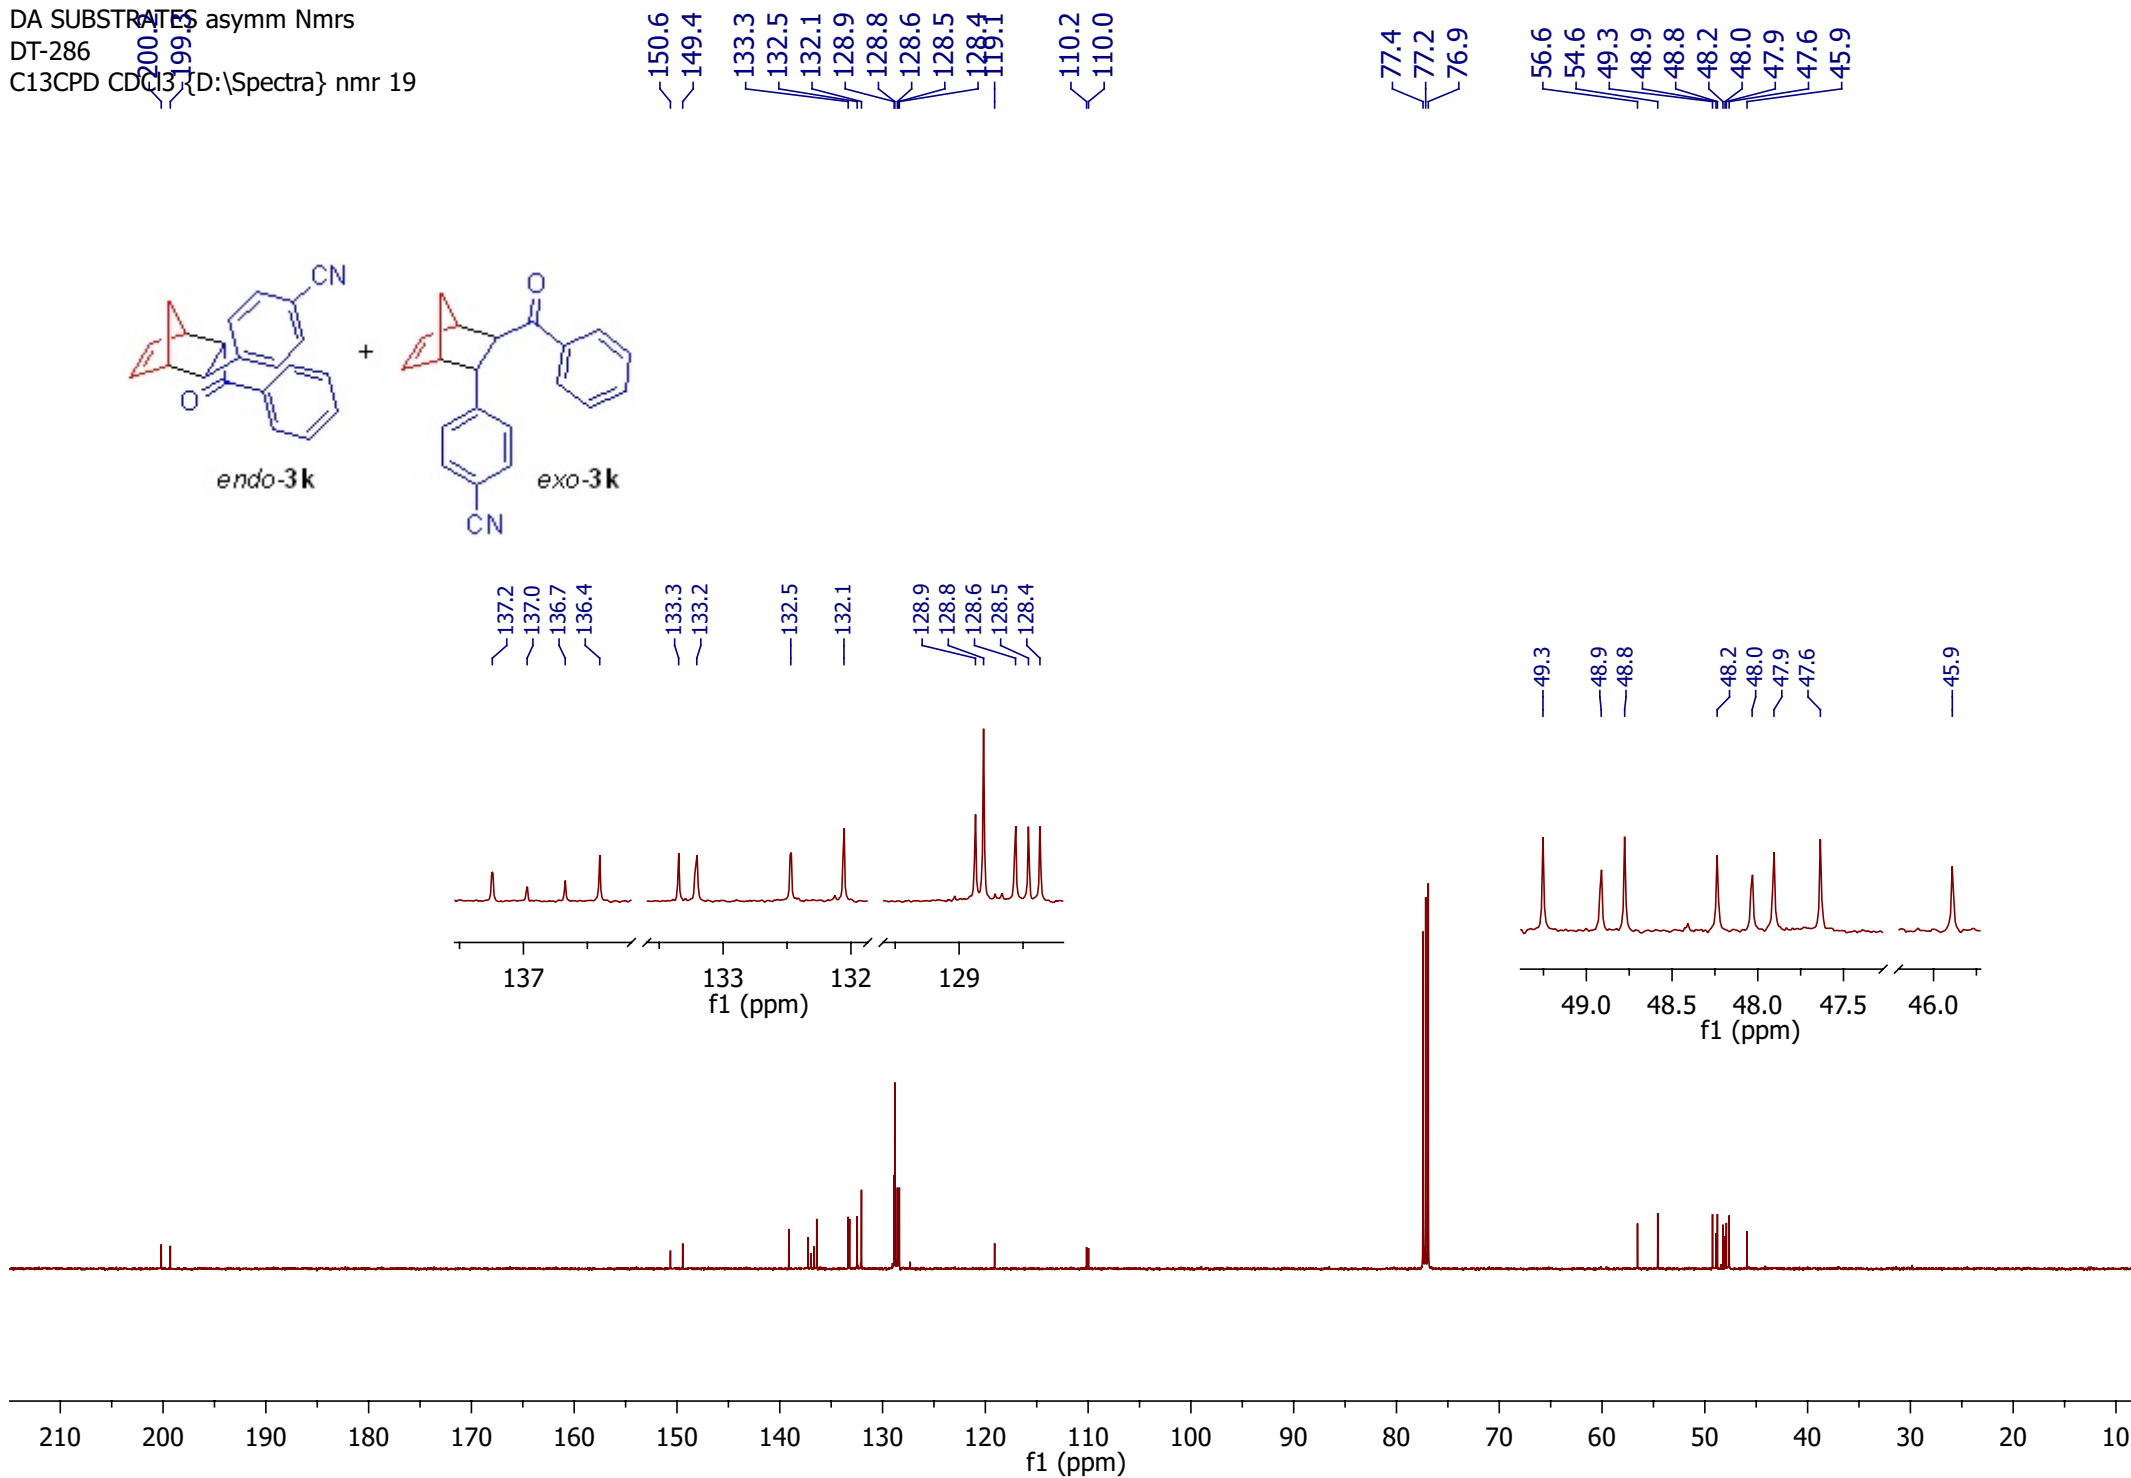

DA SUBSTRATE AcEsasymm Nmr  
 D6  
 1H scan CDCl3 (D) Spectra nmr4

7.764  
7.755  
7.742  
7.746  
7.936  
7.891  
7.888  
7.888  
7.888  
7.888  
7.877  
7.260  
7.173  
7.157  
7.116  
7.111  
7.106  
7.100  
7.094  
7.090  
7.076  
7.060  
7.055  
7.048  
7.045  
7.039  
7.025  
6.466  
6.460  
6.455  
6.449  
6.449  
5.889  
5.884  
5.878  
5.873  
3.850  
3.843  
3.840  
3.833  
3.792  
3.785  
3.781  
3.774  
3.396  
3.388  
3.351  
3.348  
3.341  
3.338  
3.310  
3.136  
3.129  
3.121  
3.079  
3.076  
2.033  
2.016  
2.306  
2.033  
2.016  
2.016  
1.891  
1.873  
1.653  
1.649  
1.636  
1.632  
1.636  
1.632  
1.632  
1.632  
1.569  
1.556  
1.552

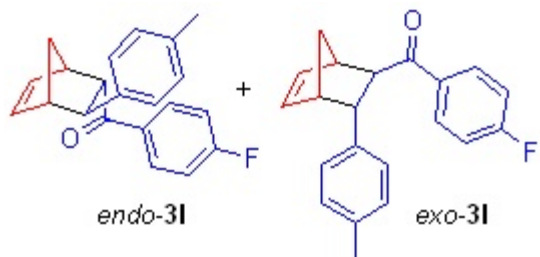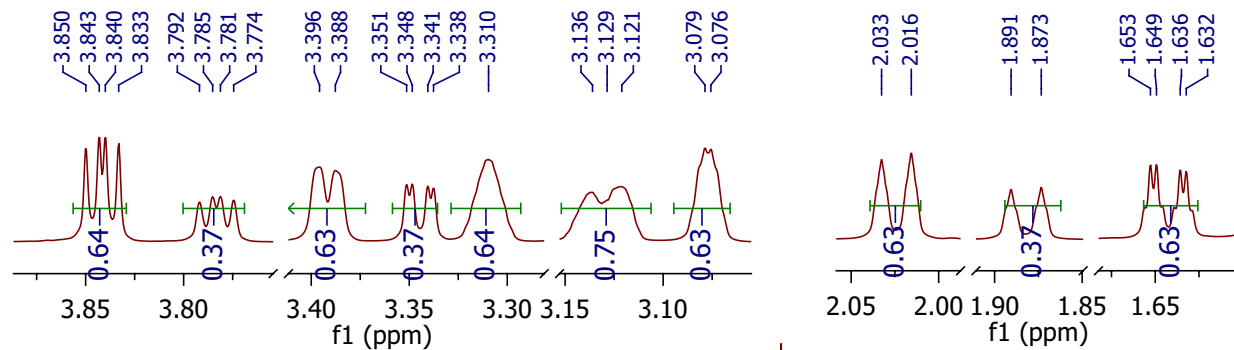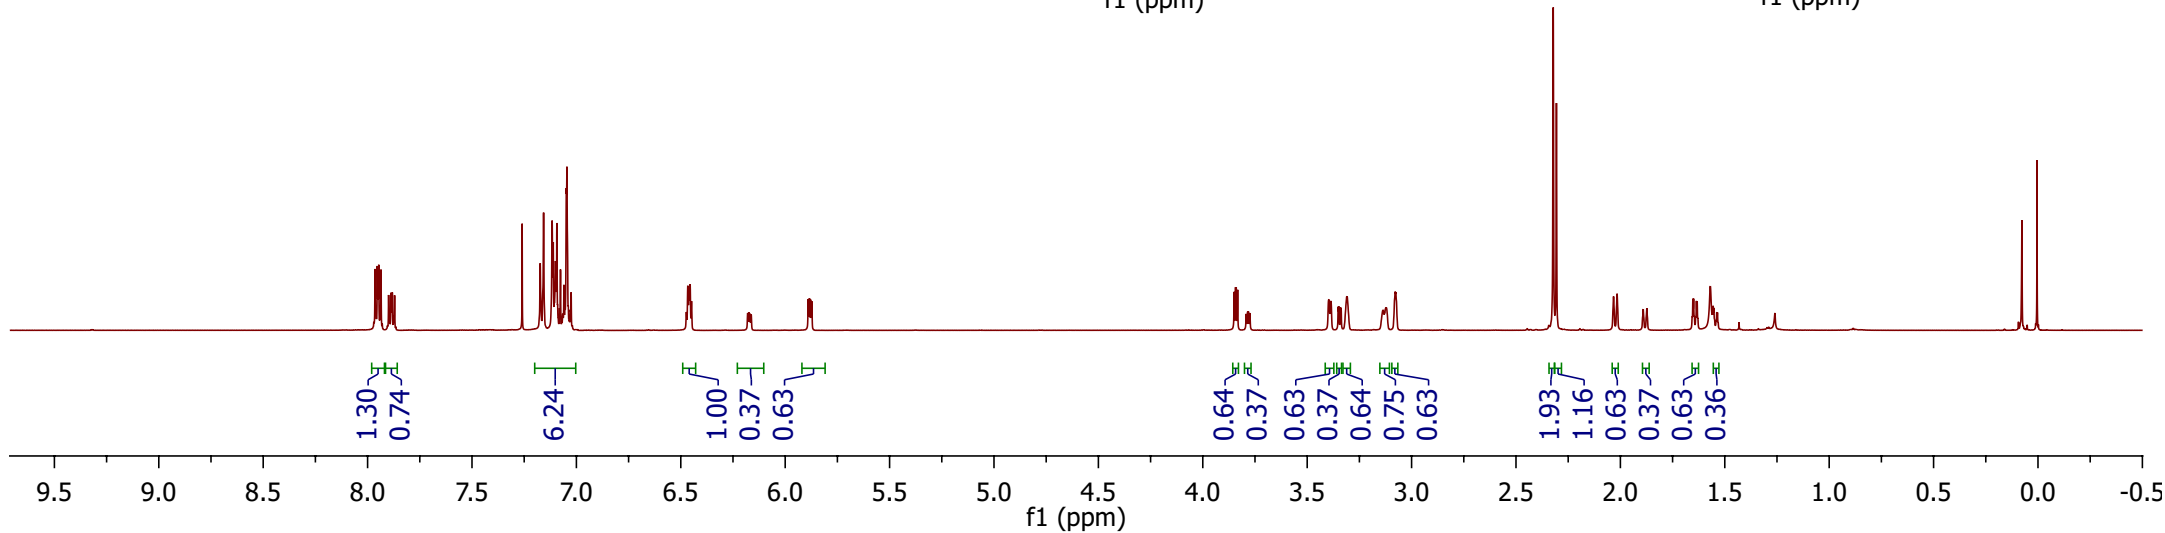

DA SUBSTRATES asymm Nmrs  
DT-282  
C13CPD CDCl3 {D:\Spectra} nmr 52

200.6  
198.7  
166.7  
164.7  
141.6  
139.3  
137.0  
135.7  
133.0  
131.2  
131.1  
131.0  
129.4  
129.0  
128.0  
127.5  
115.8  
115.7  
115.6  
115.6

77.4  
77.2  
76.9

56.3  
54.7  
49.1  
48.9  
48.8  
48.6  
48.2  
48.1  
47.8  
45.9

21.1

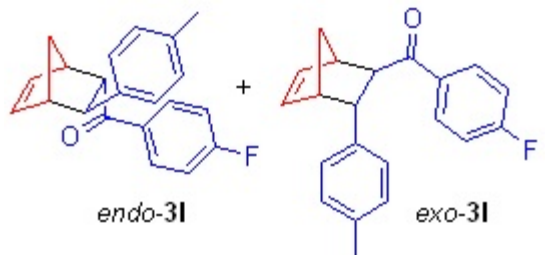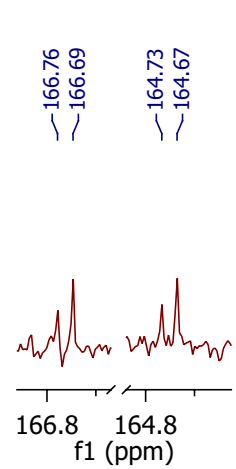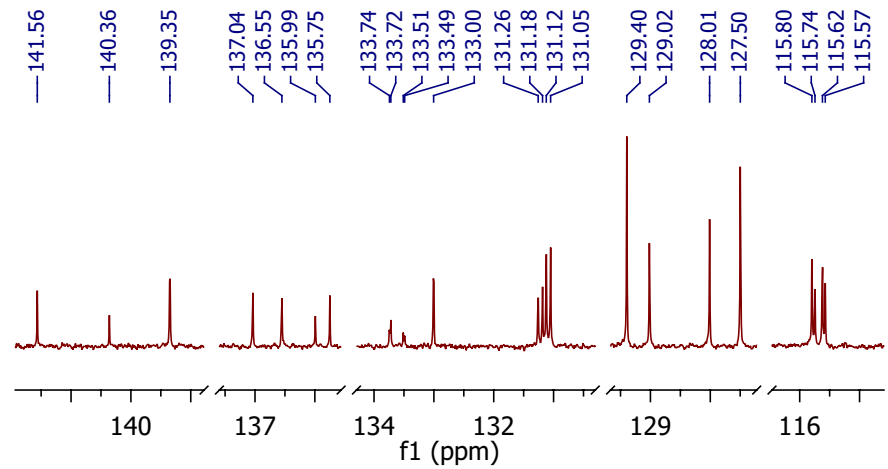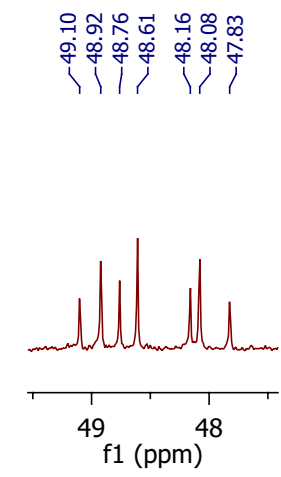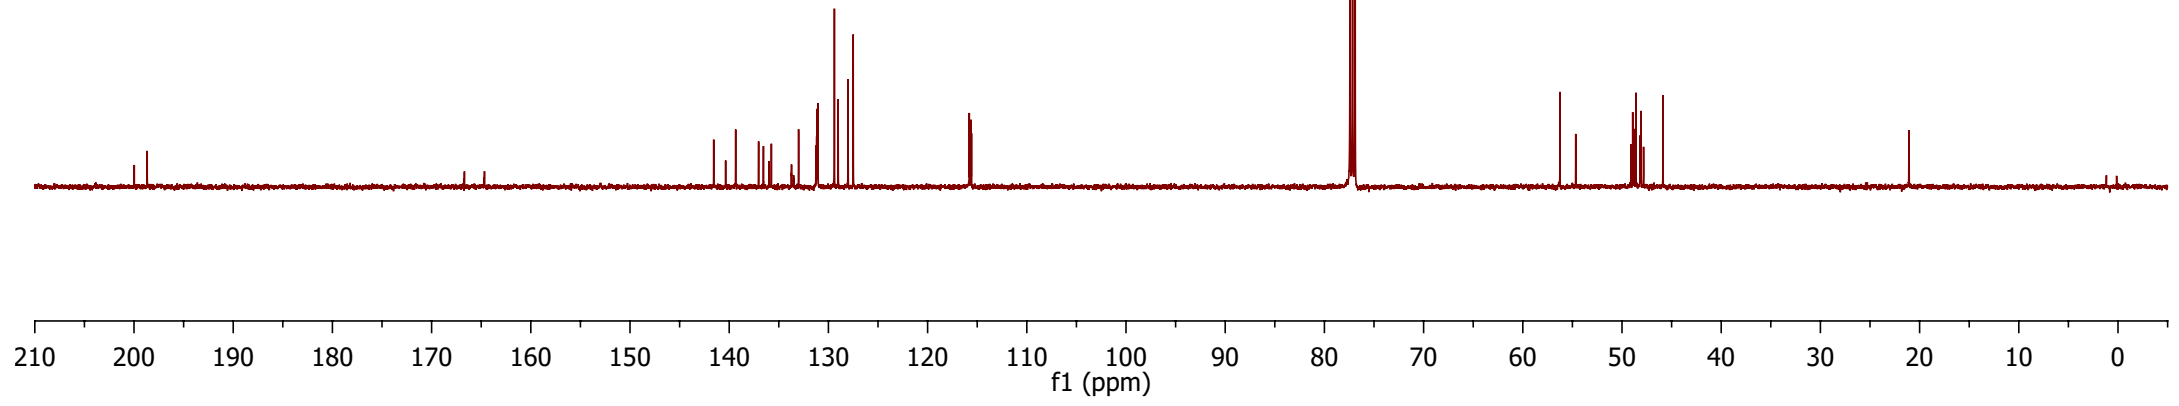

D:\SUBSTRATES\asymm\Nmr\1H scan CDCl3 (D)\Spectra\hmr31

7.866  
7.863  
7.866  
7.858  
7.843  
7.841  
7.799  
7.795  
7.784  
7.788  
7.410  
7.405  
7.401  
7.395  
7.391  
7.387  
7.383  
7.352  
7.348  
7.338  
7.334  
7.260  
7.168  
7.152  
7.115  
7.099  
7.046  
7.039  
6.461  
6.454  
6.449  
6.443  
5.879  
5.873  
5.867  
5.862  
3.837  
3.830  
3.827  
3.820  
3.767  
3.763  
3.385  
3.377  
3.336  
3.333  
3.325  
3.322  
3.298  
3.132  
3.117  
3.074  
3.071  
2.027  
2.010  
1.878  
1.861  
1.649  
1.645  
1.632  
1.628  
1.628  
1.429

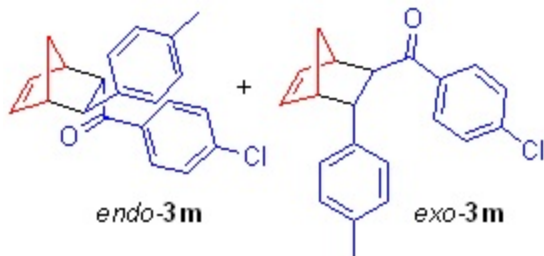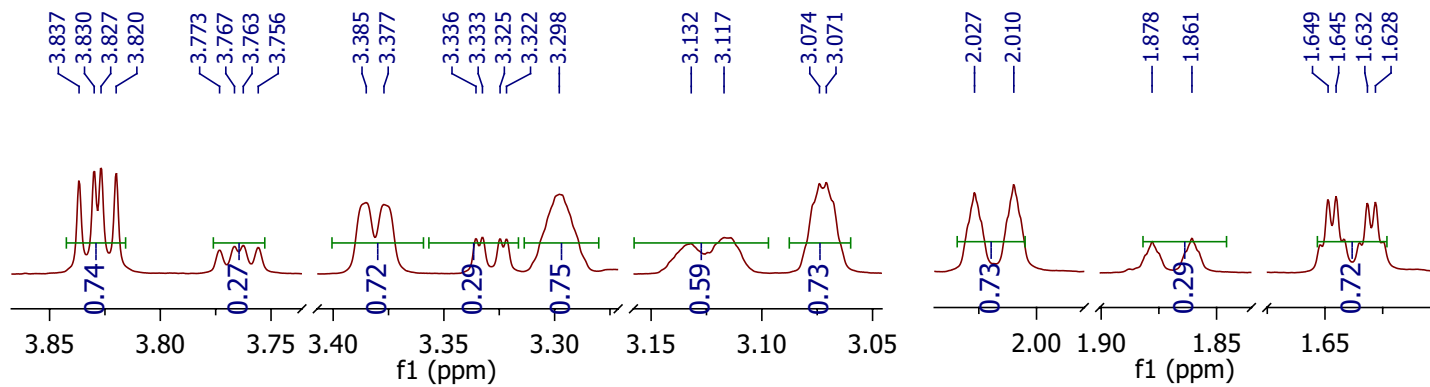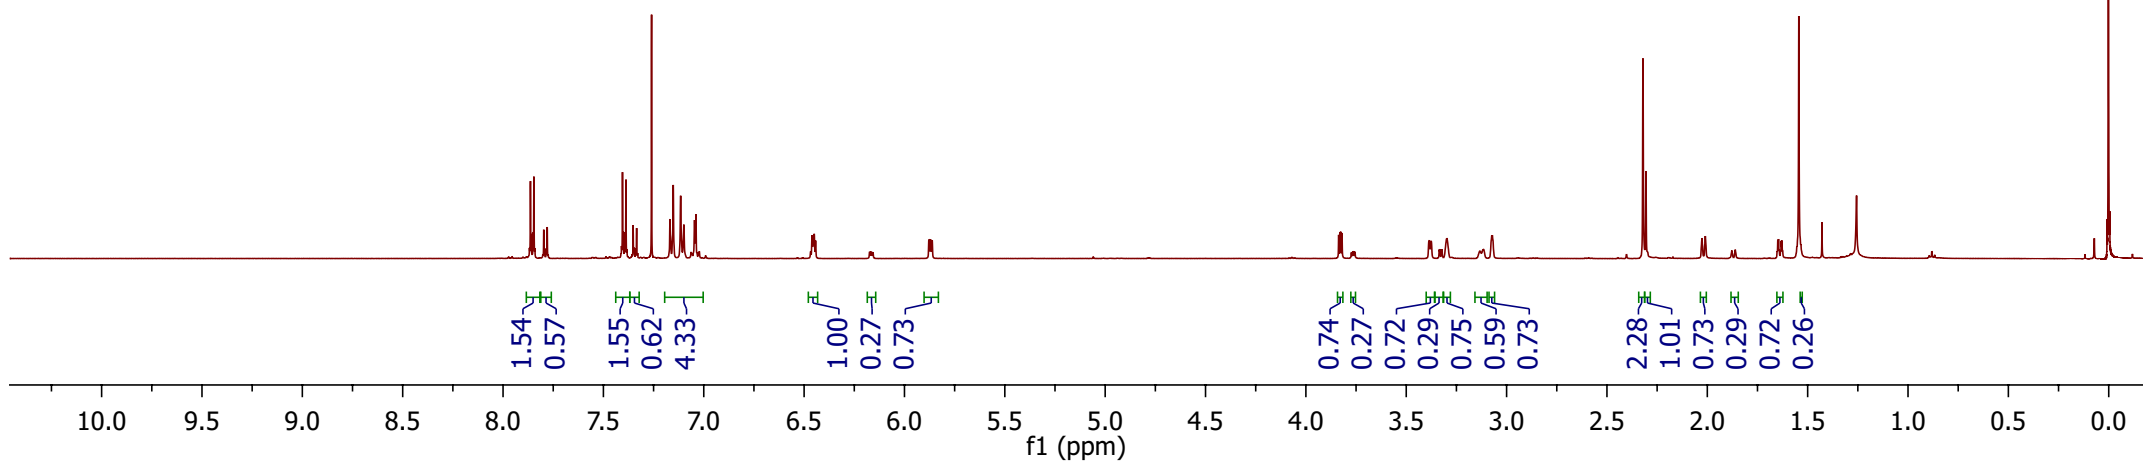

DA SUBSTRATES asymm Nmrs  
DT-283  
C13CPD CDCl3 {D:\Spectra} nmr 31

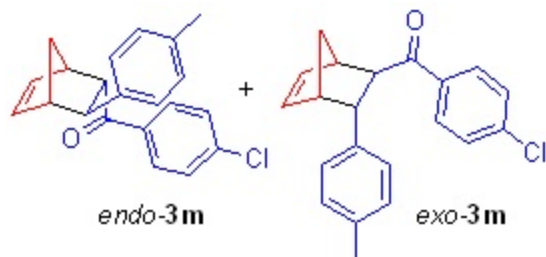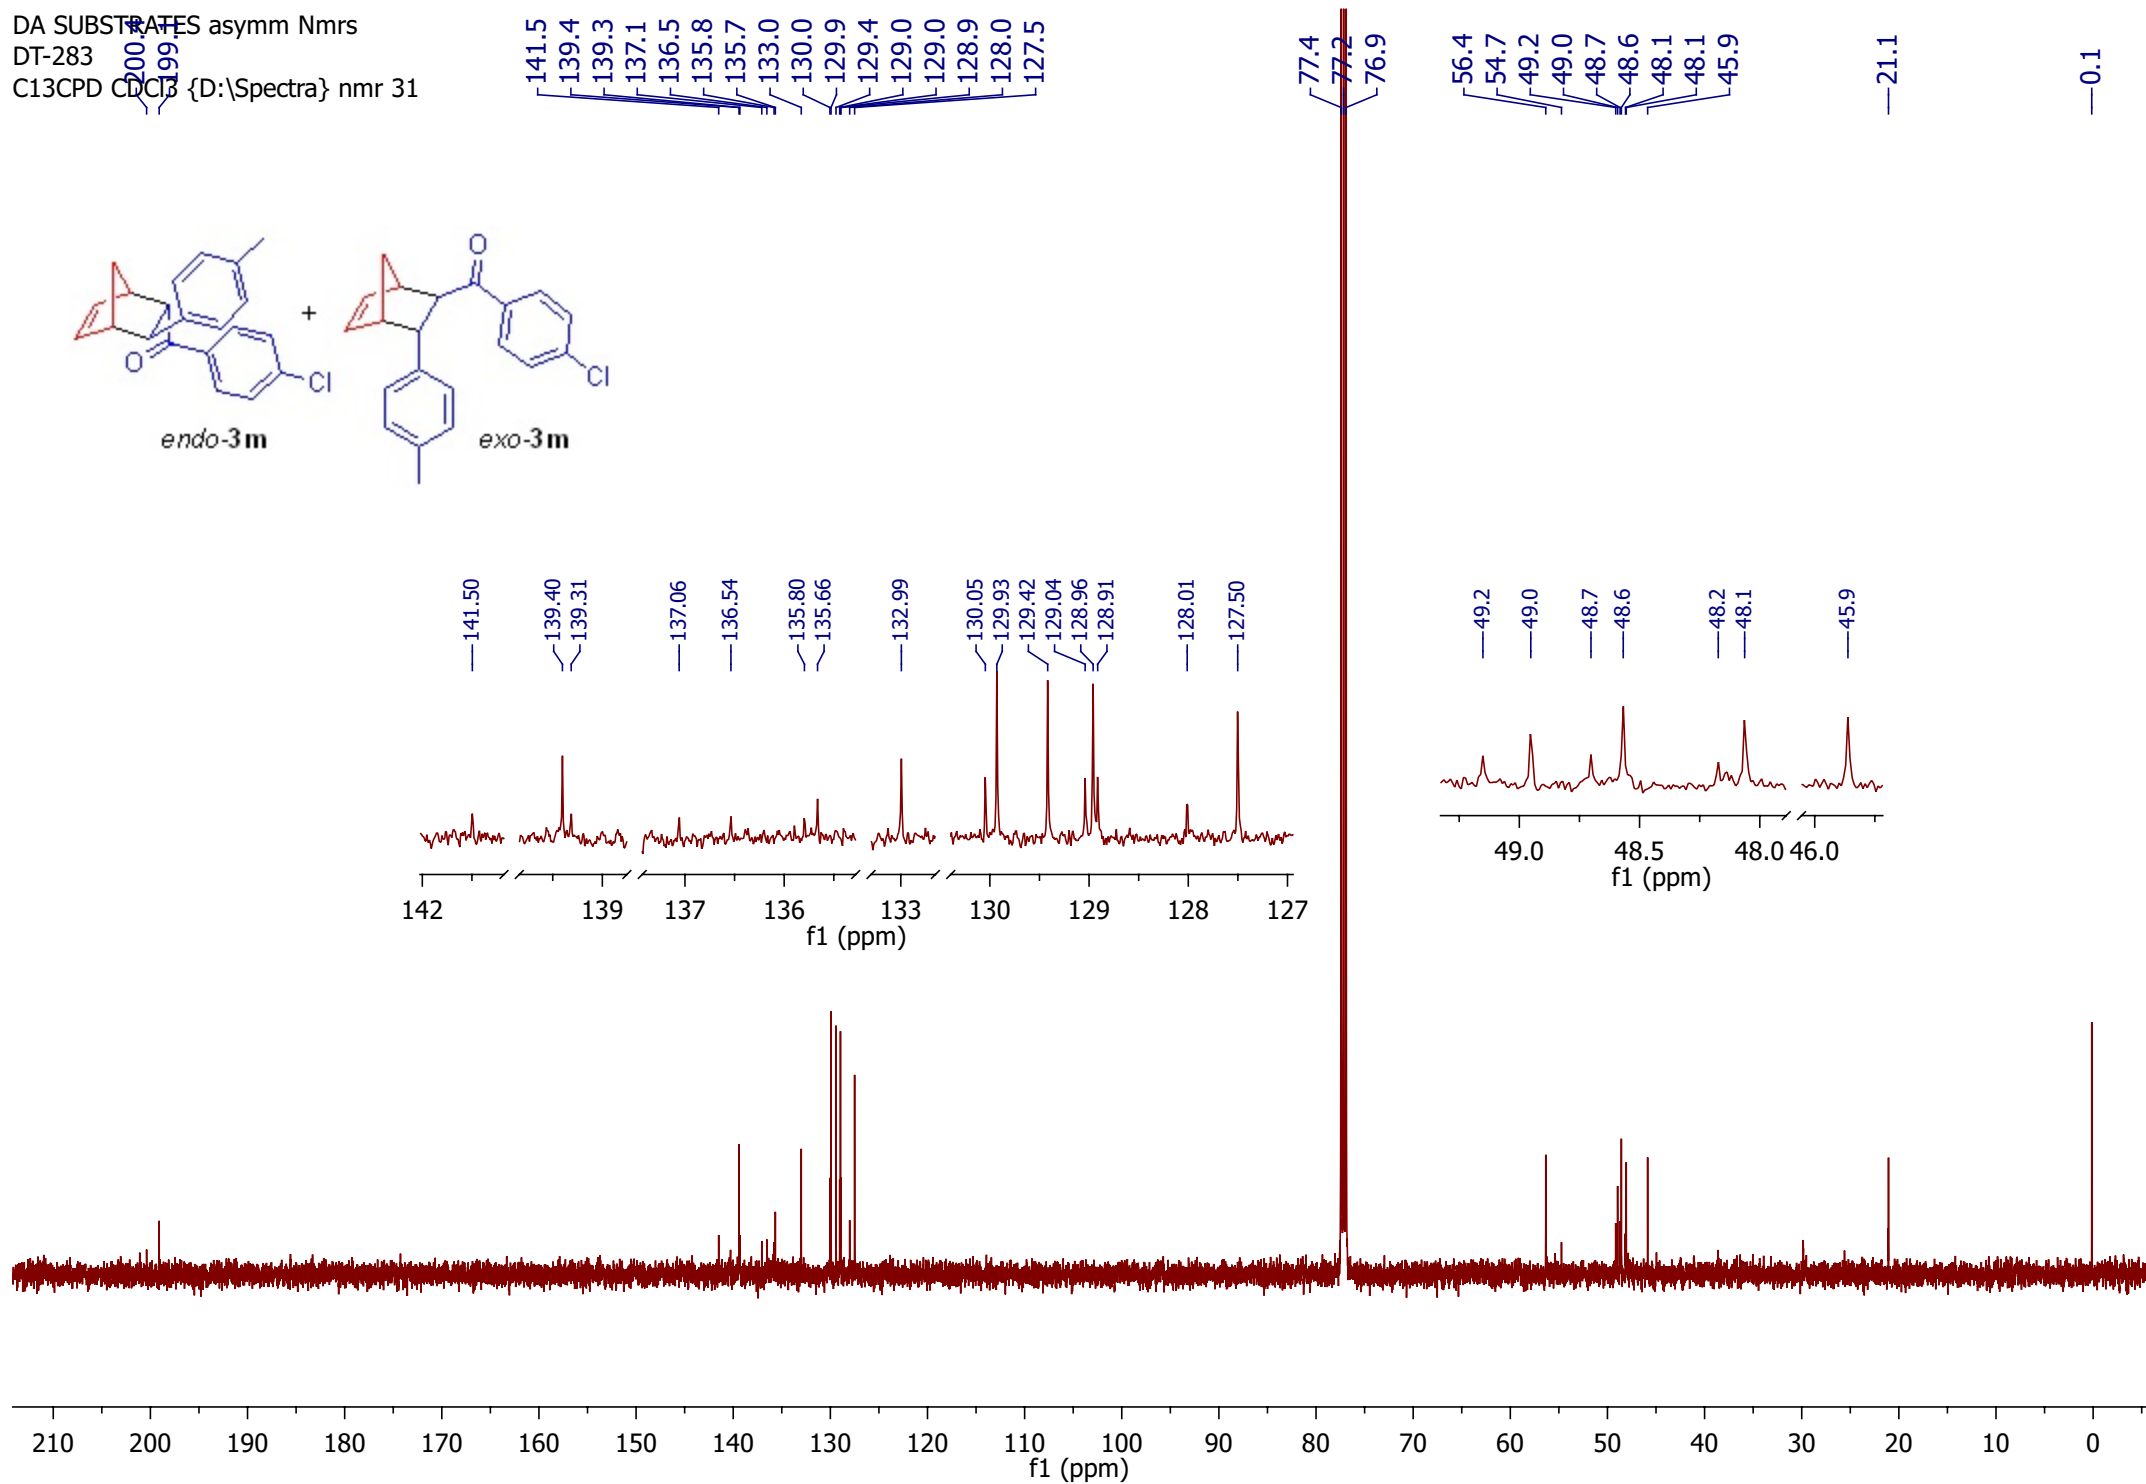

DA SUBSTRATES Asymmetric  
 1H NMR Scan CDCl3 (DMSO-d6) Spectra pmr 55

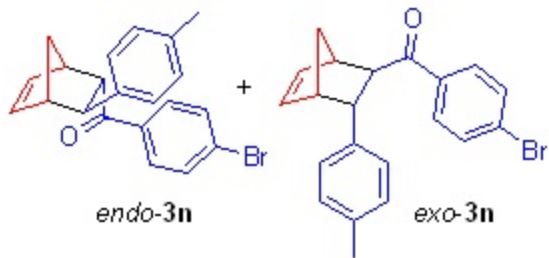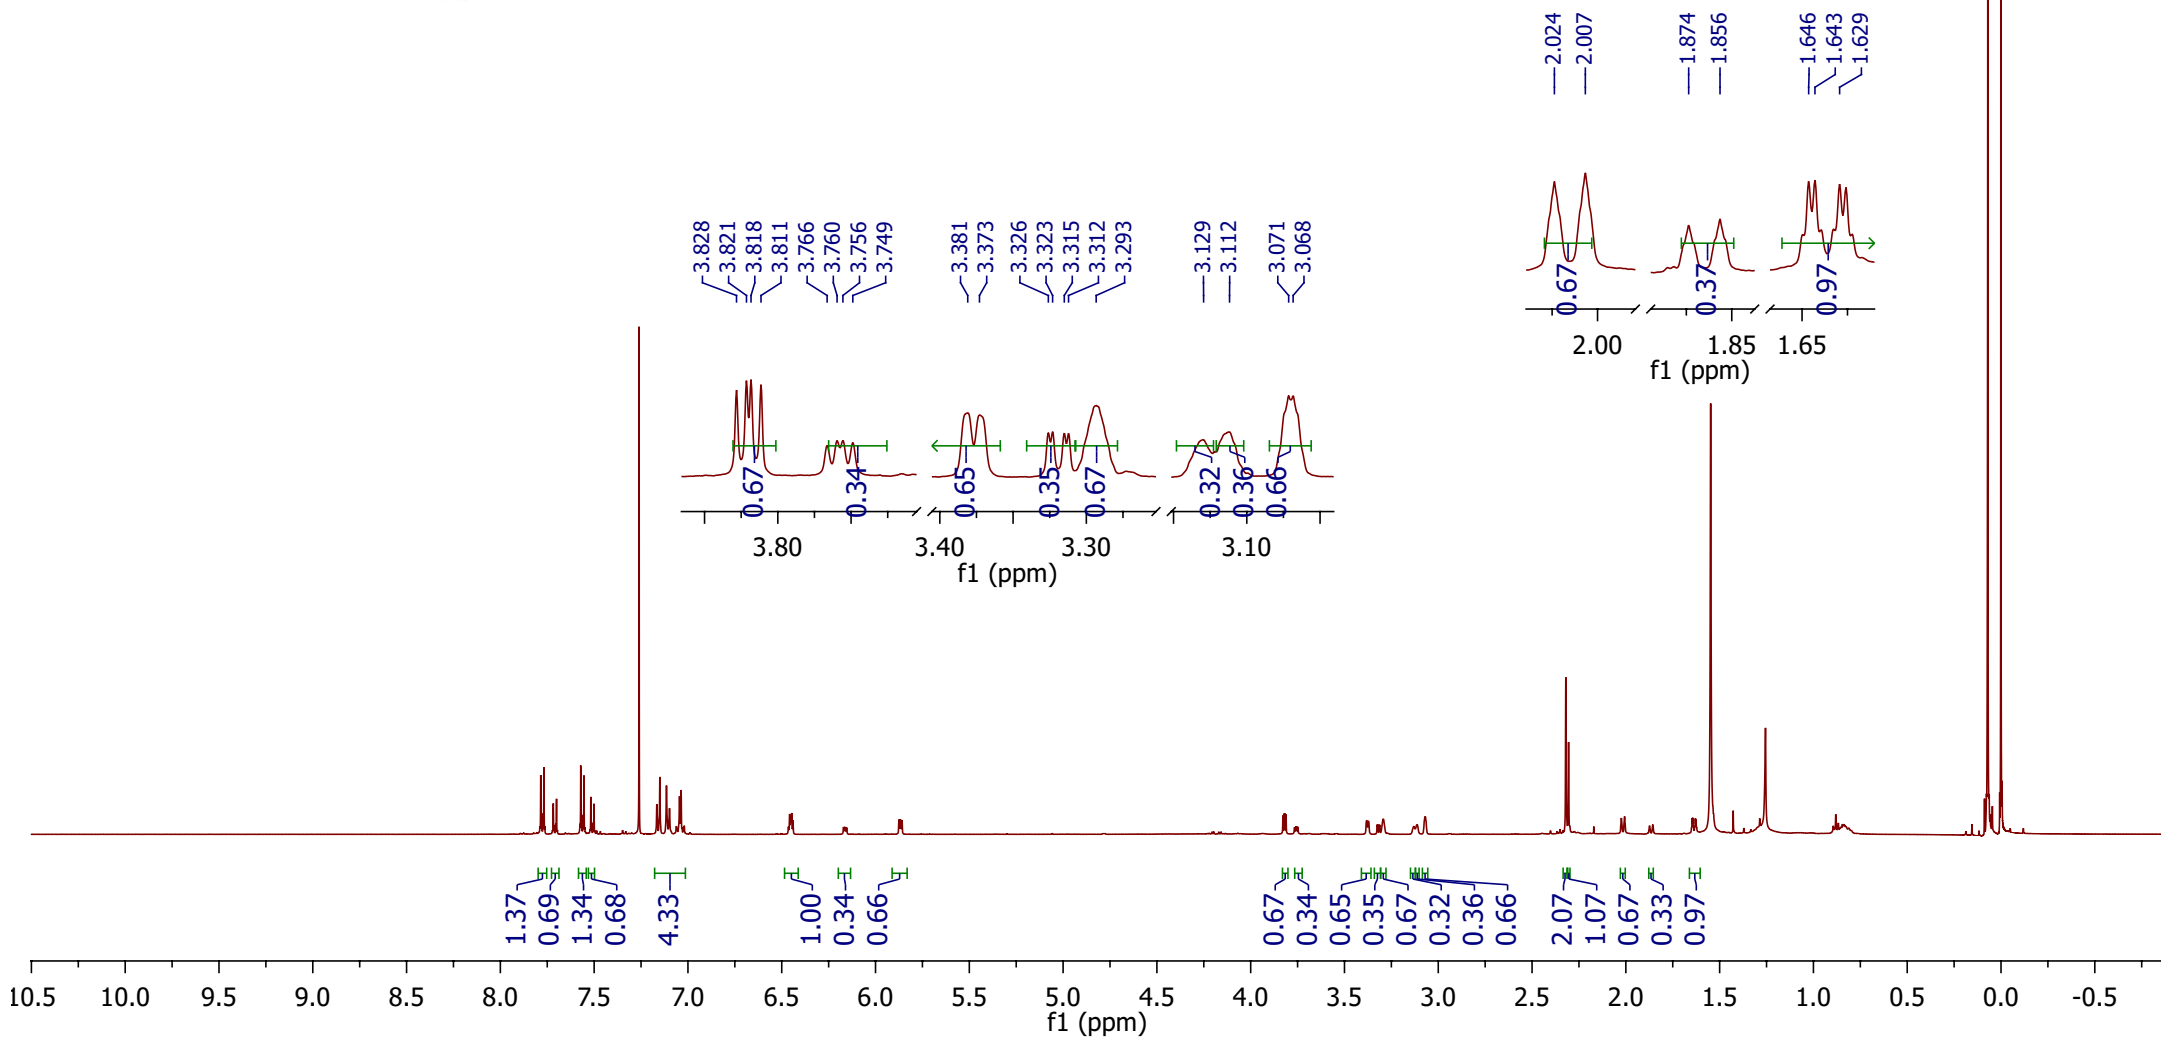

DA SUBSTRATES asymm Nmrs  
DT-28  
C13CPD CDCl3 {D:\Spectra} nmr 55

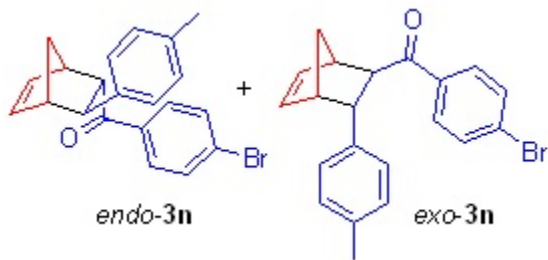

141.6  
139.4  
138.6  
137.2  
137.1  
136.0  
135.8  
135.1  
133.0  
132.0  
131.9  
131.9  
130.2  
130.1  
129.4  
129.0  
128.0  
127.5

77.4  
77.2  
76.9

56.3

49.2  
49.0  
48.7  
48.6  
48.6  
48.2  
48.1  
47.9

21.1

141.62

139.41

138.61

137.21

137.06

136.02

135.80

135.07

133.00

131.95

131.91

131.88

130.19

130.08

129.42

129.03

128.01

127.50

49.2

49.0

48.7

48.6

48.6

48.2

48.1

47.9

142 140 138 136 134 f1 (ppm)

48.5 47.5 f1 (ppm)

210 200 190 180 170 160 150 140 130 120 110 100 90 80 70 60 50 40 30 20 10 0 f1 (ppm)

DA SUBSTRATES asymmetric  
D 285 CH<sub>3</sub>/OCH<sub>3</sub>  
1H scan CDCl<sub>3</sub> (D:\Spectra\hmr14

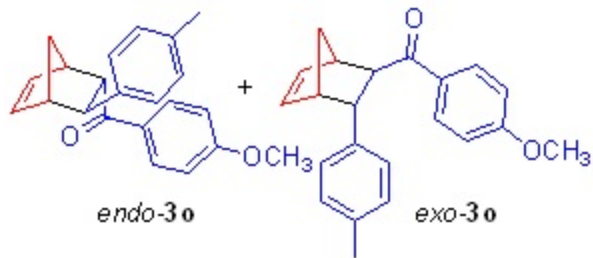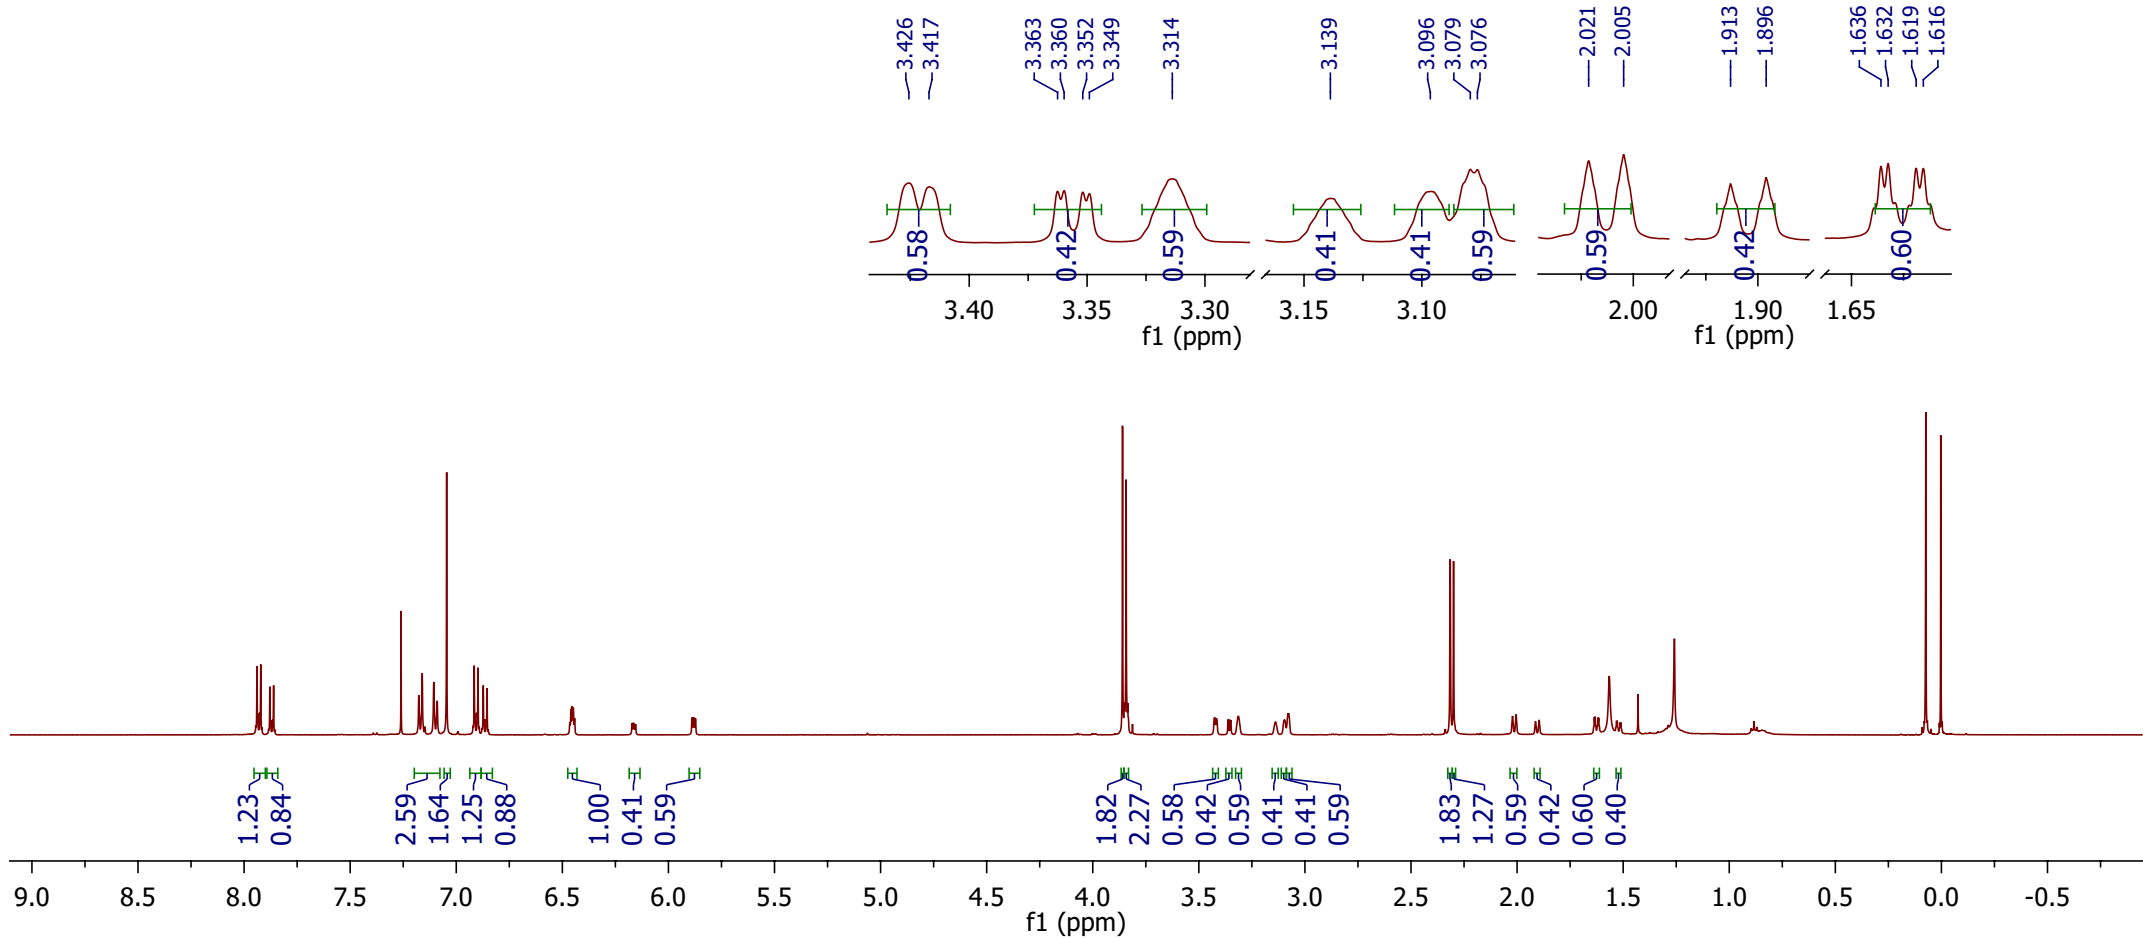

DA SUBSTRATES asymm Nmrs  
DT-285 CH3/OCH3  
C13CPD CDCl3 {D:\Spectra} nmr 14

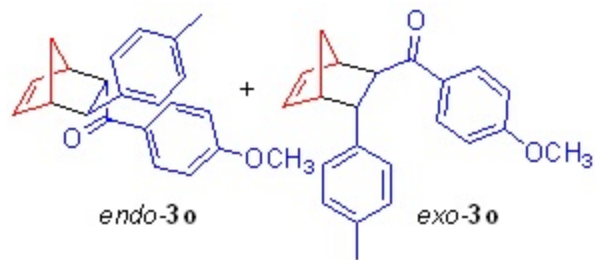

163.4  
163.4  
141.9  
139.2  
136.9  
136.7  
135.8  
133.1  
130.9  
130.8  
129.3  
128.9  
128.1  
127.5  
113.8  
113.8

77.4  
77.2  
76.9  
55.9  
55.6  
55.6  
54.3  
49.1  
48.9  
48.8  
48.8  
48.1  
48.1  
47.6  
45.7  
29.8  
21.1  
21.1

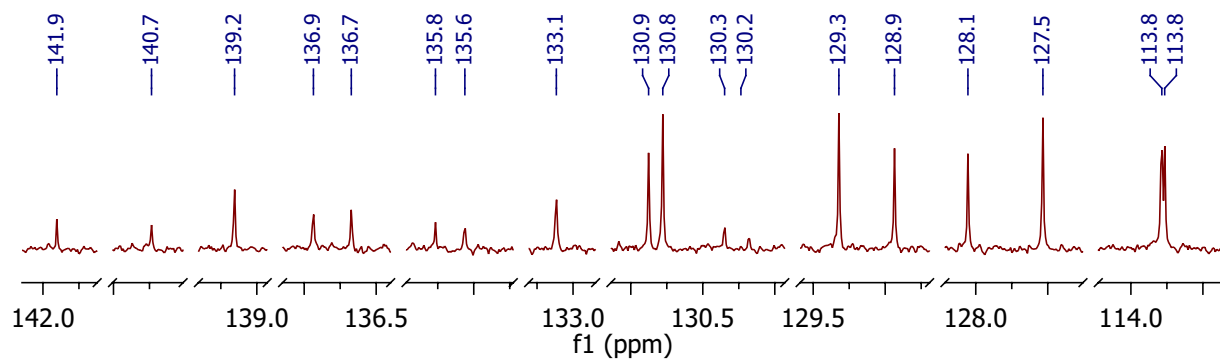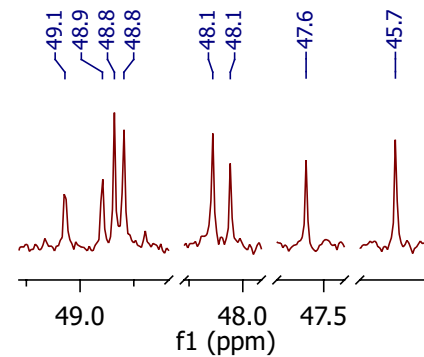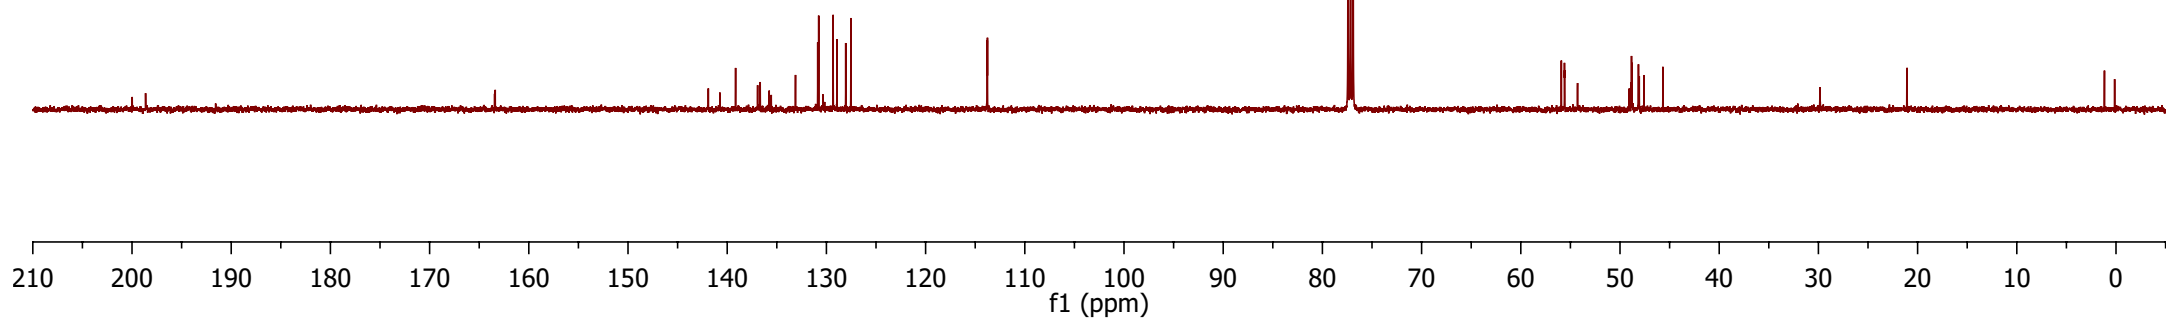

Supplement: d6gc01518b1.pdf [file d6gc01518b1.pdf]
